1 **Short structural variation fuelled CAM evolution within an explosive bromeliad radiation**

2

3 Clara Groot Crego<sup>1,2</sup>, Jaqueline Hess<sup>1,3</sup>, Gil Yardeni<sup>1,4</sup>, Marylaure de La Harpe<sup>1,5</sup>, Francesca

4 Beclin<sup>1,2,6</sup>, Luiz A. Cauz-Santos<sup>1</sup>, Sarah Saadain<sup>1</sup>, Thelma Barbará<sup>1</sup>, Eva M. Temsch<sup>1</sup>, Hanna

5 Weiss-Schneeweiss<sup>1</sup>, Michael H.J. Barfuss<sup>1</sup>, Walter Till<sup>1</sup>, Karolina Heyduk<sup>7,8</sup>, Christian Lexer<sup>1</sup>,

6 Ovidiu Paun<sup>1\*</sup>, Thibault Leroy<sup>1,9\*</sup>

7

8 <sup>1</sup>Department of Botany and Biodiversity Research, University of Vienna, Vienna, Austria

9 <sup>2</sup>Vienna Graduate School of Population Genetics, Vienna, Austria

10 <sup>3</sup>Cambrium GmbH, Max-Urich-Str. 3, 13055 Berlin, Germany

11 <sup>4</sup>Institute of Computational Biology, Department of Biotechnology, University of Life Sciences  
12 and Natural Resources (BOKU), Muthgasse 18, 1190 Vienna, Austria.

13 <sup>5</sup>Office for Nature and Environment, Canton of Grisons, Chur, Switzerland

14 <sup>6</sup>Gregor Mendel Institute, Austrian Academy of Sciences, Vienna BioCenter, Vienna, Austria

15 <sup>7</sup>School of Life Sciences, University of Hawai‘i at Mānoa, Honolulu, HI USA

16 <sup>8</sup>Ecology and Evolutionary Biology, University of Connecticut, Storrs, CT USA

17 <sup>9</sup>GenPhySE, INRAE, INP, ENVT, Université de Toulouse, Castanet-Tolosan, France

18

19 \*Shared authorship

20

21 Correspondence to: [clara.groot.crego@univie.ac.at](mailto:clara.groot.crego@univie.ac.at), ORCID: 0000-0002-4547-3608

22

## 23        **1. Abstract**

24

25    Identifying the drivers of trait evolution and diversification is central to understanding plant  
26    diversity and evolution. The subgenus *Tillandsia* (Bromeliaceae) belongs to one of the fastest  
27    radiating clades in the plant kingdom and is characterised by the repeated evolution of the water-  
28    conserving Crassulacean Acid Metabolism (CAM). Despite its complex genetic basis, CAM has  
29    evolved independently across many plant families and over short timescales. By producing the  
30    first high-quality genome assemblies of a species pair representing a recent CAM/C3 shift, we  
31    were able to pinpoint the genomic drivers of trait evolution and diversification in *Tillandsia*. We  
32    combined genome-wide investigations of synteny, TE dynamics, sequence evolution, gene family  
33    evolution and differential expression to highlight the crucial role of rapid gene family expansion  
34    and transposable element activity associated with differentially expressed genes in fuelling  
35    CAM/C3 shifts in this vast plant radiation.

36

## 37        **2. Introduction**

38

39        The evolution of key innovation traits as a means to access novel niches has been described  
40    as an important mechanism that stimulates species diversification<sup>1,2</sup>. The water-conserving mode  
41    of photosynthesis known as Crassulacean Acid Metabolism (CAM) is an important trait for plant  
42    adaptation to arid environments and the epiphytic lifeform<sup>3</sup>. CAM functions as a carbon  
43    concentrating mechanism by shifting CO<sub>2</sub> assimilation to the night-time. This has the dual effect  
44    of enhancing the efficiency of both Rubisco, the first enzyme of the Calvin cycle, and of overall  
45    water use, as stomata remain closed during the day, which prevents evapotranspiration<sup>4</sup>. CAM has  
46    evolved repeatedly in at least 35 plant families<sup>5</sup>, raising questions on the possible mechanisms

47 allowing this complex trait to continuously re-emerge throughout plant history. Achieving a better  
48 understanding of the repeated evolution of CAM does not only contribute to our understanding of  
49 complex traits but also provides opportunities to enhance the water use efficiency of agricultural  
50 crops, a pressing matter in a future shrouded by drought and food insecurity linked to climate  
51 change<sup>4</sup>.

52         Though abundant ecological opportunity is traditionally regarded as the main driver of  
53 rapid diversification in adaptive radiations, it is unclear what mechanisms can provide genetic  
54 variation rapidly enough to be recruited over short timescales. Recent studies on adaptive radiation  
55 have pointed at the role of large-scale rearrangements<sup>6</sup>, indels<sup>7</sup>, transposable element (TE)  
56 dynamics<sup>8</sup>, coding sequence evolution and regulatory divergence<sup>8</sup> as intrinsic drivers shaping  
57 diversification, suggesting that lineages with elevated rates of genome evolution, also coined as  
58 “genomic potential”<sup>7</sup>, may be more prone than others to rapidly diversify and evolve key  
59 innovation traits such as CAM.

60         TE dynamics can generate functional variation which has been shown to play a role in local  
61 adaptation in *Arabidopsis*<sup>9</sup> and in the evolution of reproductive barriers in *Corvus*<sup>10</sup>. Chromosomal  
62 fusions, inversions or translocations can increase linkage between co-adapted alleles and generate  
63 reproductive barriers<sup>11,12</sup>. Both TE activity and chromosomal fusion have been associated with  
64 elevated speciation rates<sup>13,14</sup>. Gene duplication occurs at higher rates than point mutation in many  
65 lineages<sup>15</sup> and can lead to novel functional variation through dosage effects, neo-functionalization,  
66 or subfunctionalization, as observed in teleost fish<sup>16,17</sup> and orchids<sup>18</sup>.

67         The adaptive radiation of *Tillandsia* subgenus *Tillandsia* (Bromeliaceae) is part of one of  
68 the fastest diversifying clades known in the plant kingdom (Tillandsioideae)<sup>19</sup> and is characterized  
69 by multiple key innovation traits driving extraordinary diversity both on the taxonomic and

70 ecological level<sup>20</sup>. CAM has been described as an ecological driver of diversification in the  
71 subgenus *Tillandsia*<sup>20</sup>, and across Bromeliaceae in general<sup>19</sup>. Though Bromeliaceae are regarded  
72 as a homoploid radiation with conserved chromosome counts and little genome size variation<sup>21</sup>,  
73 more recent work has pointed at the high “genomic potential” of the subgenus *Tillandsia*, notably  
74 from elevated gene loss and duplication rates<sup>22</sup> and high transposable element dynamics (Neil  
75 McNair, personal communication).

76 In this study, we present and investigate the *de novo* assembled genomes of two  
77 ecologically divergent members of the subgenus *Tillandsia* to further our understanding of the  
78 drivers of this recent radiation. *Tillandsia fasciculata* (Fig. 1a). displays a set of phenotypes  
79 typically described as “grey” *Tillandsia*<sup>23</sup>: a dense layer of absorptive trichomes, CAM  
80 photosynthesis<sup>22,24</sup> and occurrence in arid places with high solar incidence and low rainfall. On the  
81 other hand, *T. leiboldiana* (Fig. 1b) is a typical “green” *Tillandsia*: a C3 plant<sup>22,24</sup> that displays  
82 tank formation, lacks a dense layer of trichomes and occurs in cooler, wetter regions. The two  
83 species belong to sister clades representing a clear CAM/C3 shift (Fig. 1c). This is the first study  
84 to produce high-quality bromelioid reference genomes representing a CAM/C3 shift at short  
85 evolutionary timescales. By investigating synteny, molecular evolution, gene family evolution and  
86 differential gene expression, we find evidence that CAM/C3 differences are largely regulatory, but  
87 have been aided by gene family expansion and transposon activity.

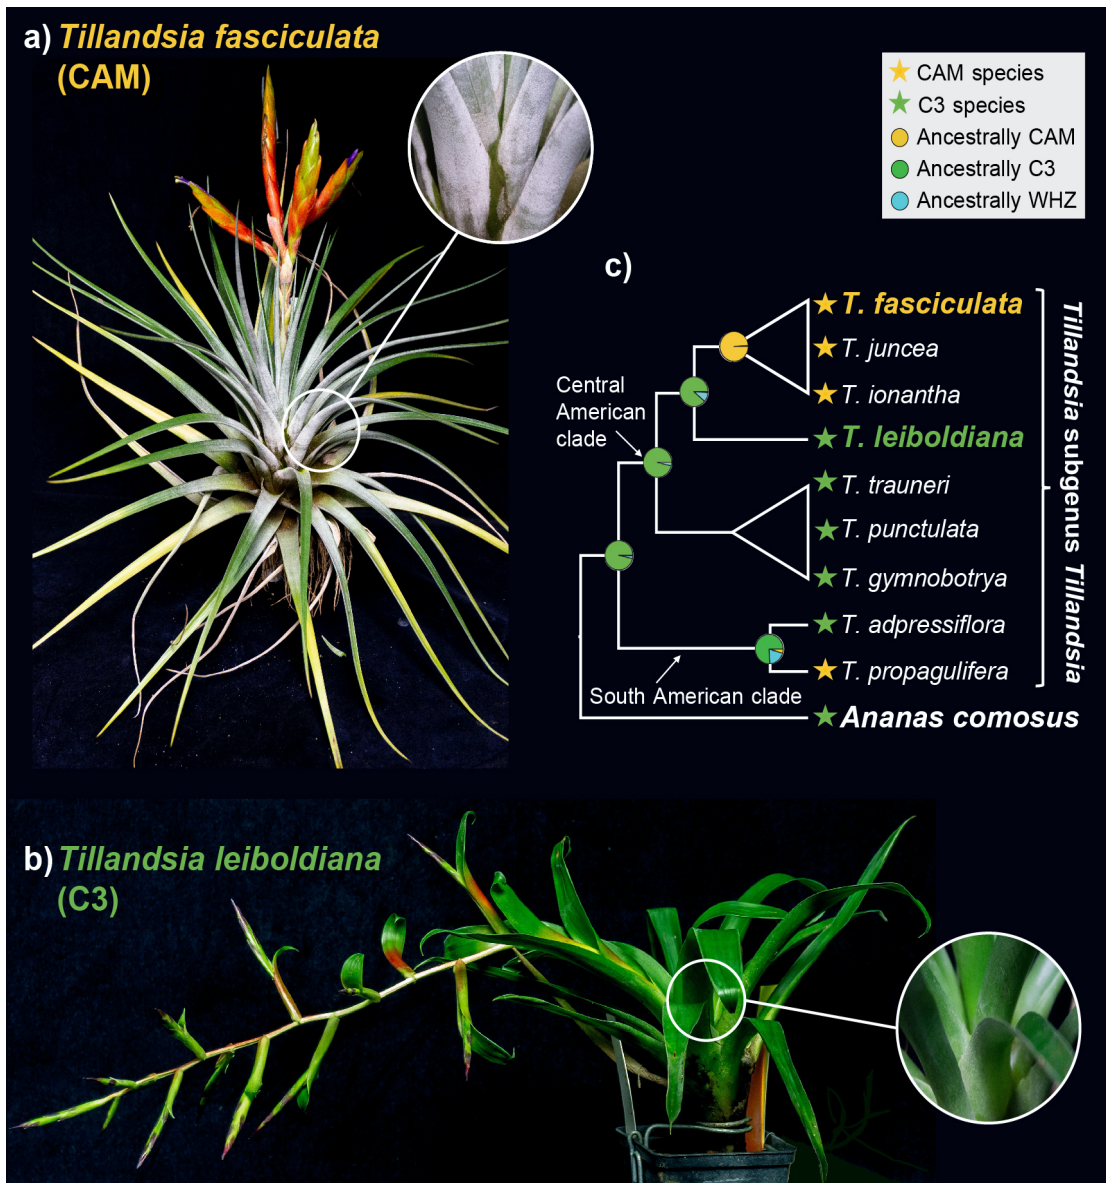

88

89 **Figure 1:** a) *Tillandsia fasciculata*, a typical “grey” *Tillandsia* with a dense layer of trichomes and CAM  
90 photosynthesis. b) *Tillandsia leiboldiana*, a green *Tillandsia* with C3 photosynthesis, an impounding tank  
91 and few trichomes. c) Schematic representation of the evolutionary relationship between the two  
92 investigated species of *Tillandsia*. Stars indicate whether a species performs CAM or C3<sup>22</sup>. Pie charts at  
93 internal nodes show the ancestral state of photosynthetic metabolism as reported in <sup>22</sup>. WHZ stands for  
94 Winter-Holtum Zone and represents intermediate forms of the CAM/C3 spectrum.

95

96

97

98

## 99        **3. Results**

100

### 101        **3.1. Genome assembly and annotation**

102

103            We constructed *de novo* haploid genome assemblies for both species (Table S1) using a  
104 combination of long-read (PacBio), short read (Illumina) and chromosome conformation capture  
105 (Hi-C) data. This resulted in assemblies of 838 Mb and 1198 Mb with an N50 of 23.6 and 43.3 Mb  
106 in *T. fasciculata* and *T. leiboldiana* respectively. The assembly sizes closely match the estimated  
107 genome size of each species based on flow cytometry and k-mer analysis (Table S2, SI Note 1,2).  
108 The 25 and respectively 26 longest scaffolds (hereafter referred to as ‘main scaffolds’) contain 72  
109 % and 75.5 % of the full assembly, after which scaffold sizes steeply decline (SI Note 3, Fig. S1).  
110 This number of main scaffolds corresponds with the species karyotype in *T. fasciculata*, but  
111 deviates from the *T. leiboldiana* karyotype (SI Note 1), suggesting that a few fragmented  
112 chromosome sequences remain in this assembly.

113            Structural gene annotation resulted in a total of 34,886 and 38,180 gene models in *T.*  
114 *fasciculata* and *T. leiboldiana* respectively, of which 92.6 % and 71.9 % are considered robust  
115 based on additional curation (Methods, Section 5). Annotation completeness was evaluated with  
116 BUSCO using the liliopsida dataset resulting in a score of 89.7 % complete genes in *T. fasciculata*  
117 and 85.3 % in *T. leiboldiana* (Table S2).

118

### 119        **3.2. Genic, repetitive and GC content**

120

121            TE annotation performed with EDTA<sup>25</sup> revealed a total repetitive content of 65.5 % and  
122 77.1 % in *T. fasciculata* and *T. leiboldiana* respectively. This closely matches estimates derived

123 from k-mer analyses (66 % and 75 %, SI Note 2). Compared to *T. fasciculata*, the repetitive content  
124 in *T. leiboldiana* is enriched for Gypsy LTR retrotransposon and *Mutator* DNA transposon content,  
125 with a 1.7-fold and 4.2-fold increase in genomic length, respectively (Table S3). *Mutator* DNA  
126 transposons have high transposition rates and often insert in or near genes<sup>26</sup>.

127 Repetitive content per scaffold is negatively correlated with gene count in both assemblies  
128 (Kendall's correlation coefficient: -0.79 in *T. fasciculata*, -0.82 in *T. leiboldiana*, p-values < 2.2e<sup>-</sup>  
129 <sup>16</sup>), with gene-rich regions primarily in distal positions (Fig. 2a, green track) and repetitive regions  
130 in median positions (Fig. 2a, yellow track). This pattern is accentuated in *T. leiboldiana*: on  
131 average, the repetitive-to-exonic content per scaffold is 1.6 times larger compared to *T. fasciculata*  
132 (Mann Whitney U, p-values = 4.3x10<sup>-4</sup>). The genome size difference between the two assemblies  
133 is therefore mostly explained by differential accumulation of TE content in heterochromatic  
134 regions.

135 Surprisingly, GC content is negatively correlated with gene content in both species  
136 (Kendall's correlation coefficient: -0.68 in *T. fasciculata*, -0.71 in *T. leiboldiana*, p-values < 2.2e<sup>-</sup>  
137 <sup>16</sup>, Fig. 2a, red track, Fig. 2b). By visualizing GC and TE content across a syntenic chromosome  
138 triplet of *A. comosus*, *T. fasciculata* and *T. leiboldiana*, we show that this unusual relationship can  
139 be mostly explained by elevated GC content in repetitive regions (Fig. 2b). TE-rich regions indeed  
140 exhibit a much higher GC content than TE-poor regions, a pattern which is exacerbated as the  
141 overall TE content per species increases (Fig. 2b, SI Note 5).

142

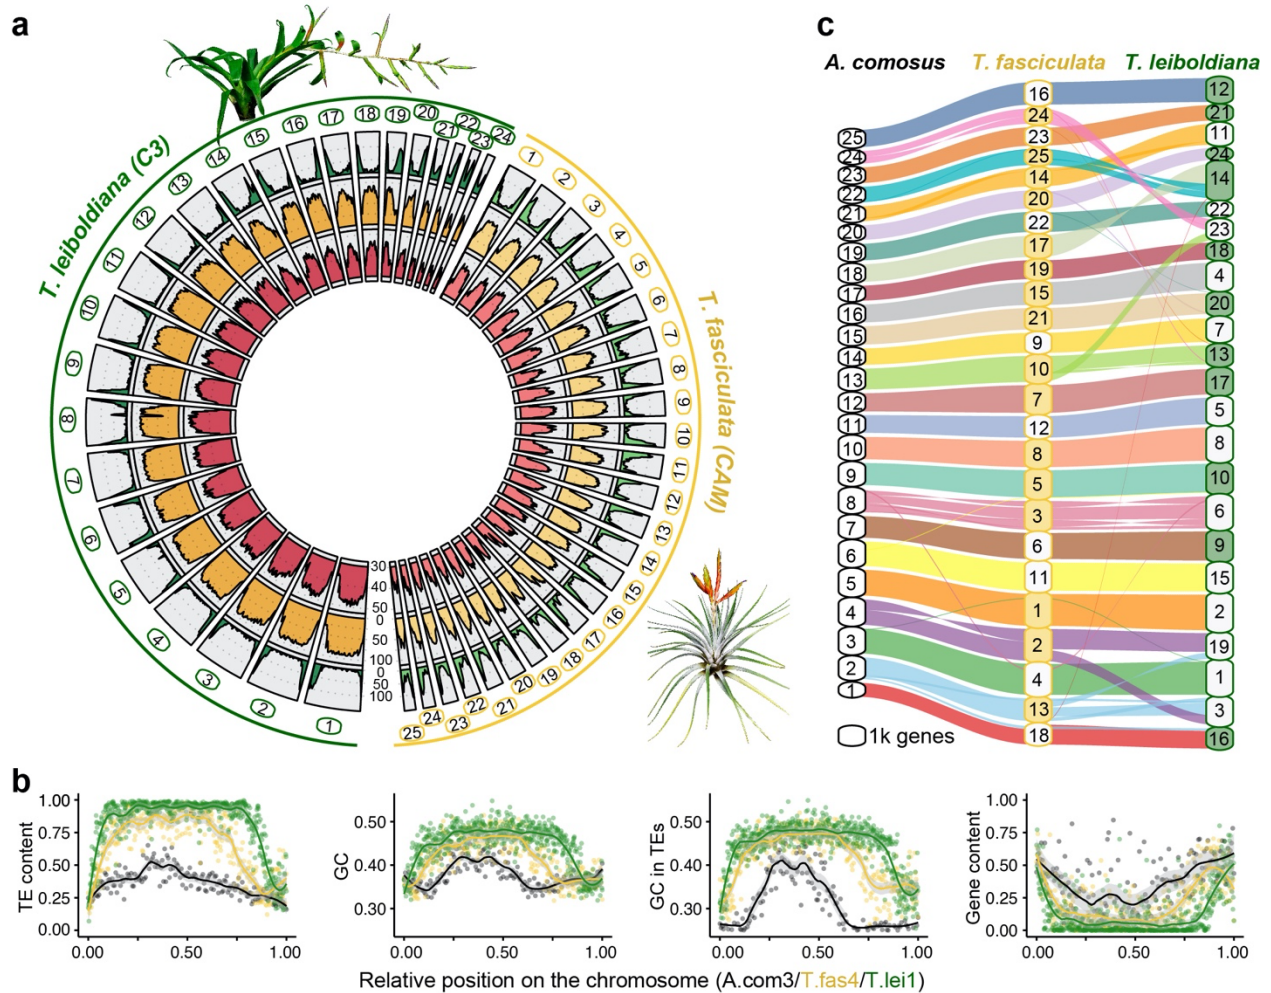

143

144 **Figure 2: a** Circular overview of the main scaffolds of the *T. fasciculata* (right) and *T. leiboldiana* (left)  
 145 genome assemblies. Scaffolds 25 and 26 of *T. leiboldiana* are not shown due to their small size. In inward  
 146 direction, the tracks show: (1, green) Gene count, (2, yellow) proportion of repetitive content, (3, red), and  
 147 GC content per 1-Mb windows. **b** Distribution of TE and GC content, GC content exclusively in TEs, and  
 148 genic content in a triplet of syntenic scaffolds between *Ananas comosus* (LG3, black), *T. fasciculata*  
 149 (scaffold 4, grey) and *T. leiboldiana* (scaffold 1, green; see Fig. S2 for other syntenic chromosomes). **c**  
 150 Syntenic plot linking blocks of orthologous genes between *A. comosus*, *T. fasciculata* and *T. leiboldiana*.  
 151 The size of each scaffold on the y-axis is determined by genic content and therefore doesn't represent the  
 152 true size of the scaffold. Color-filled boxes indicate scaffolds with reversed coordinates as compared to the  
 153 sequences in the reference.

154

155

156



## 157 3.2. Synteny and chromosomal evolution

158

159 Cytogenetic karyotyping revealed a difference of six chromosome pairs between *T.*  
160 *fasciculata* ( $2n = 50$ ) and *T. leiboldiana* ( $2n = 38$ ), an unexpected finding for a clade that was  
161 believed to be largely homoploid with constant karyotype<sup>21,27</sup> (See SI Note 1). To investigate  
162 orthology and synteny, we inferred orthogroups between protein sequences of *Ananas comosus*<sup>28</sup>  
163 (pineapple), *T. fasciculata* and *T. leiboldiana* using Orthofinder<sup>29</sup>. This resulted in 21,045 (78 %),  
164 26,325 (87.5 %) and 23,584 (75 %) gene models assigned to orthogroups respectively, of which  
165 10,021 were single-copy orthologs between all three species (Table S4).

166 Syntenic blocks were then defined across all three assemblies using Genespace<sup>30</sup> (Fig. 2c).  
167 Despite the observed karyotype difference, these blocks reveal highly conserved synteny between  
168 the two assemblies, consistent with a scenario of chromosomal fusions in *T. leiboldiana*. We found  
169 clear evidence of such a fusion on scaffold 14 in *T. leiboldiana* (Fig. 2c, Fig. S3a), which was  
170 confirmed with in-depth analyses of potential breakpoints (SI Note 6). We also detected two major  
171 reciprocal translocations (Fig. 2c, hereafter referred as Translocation 1 and 2, Fig. S3b and Fig.  
172 S3c).

173

## 174 3.3. Gene family evolution

175

176 6,261 genes in *T. fasciculata* and 4,693 genes in *T. leiboldiana* were assigned to non-unique  
177 gene families with multiple gene copies in at least one species, after correcting gene family sizes  
178 (Table S4, SI Note 7). On average, the multicopy gene family size is 1.3x larger in *T. fasciculata*  
179 than in *T. leiboldiana* (Mann Whitney U, p-value:  $8.8e^{-16}$ , Fig. 3a).

180 To investigate the role of expanded gene families in CAM evolution, we performed gene  
181 ontology (GO) term enrichment tests on multicopy orthogroups (SI Note 8). This highlighted  
182 several multi-copy gene families with functions putatively related to CAM (Table S5), such as two  
183 malate dehydrogenase families (MDH) which reversibly convert malate to oxaloacetate, two  
184 families of enolases, which catalyse the penultimate step in the glycolysis resulting in PEP, and  
185 two subunits of succinate dehydrogenase, a protein complex that is both part of the tricarboxylic  
186 acid cycle and the electron transport chain (see Fig. 5). Interestingly, succinate dehydrogenase also  
187 plays a role in stomatal regulation, which is relevant for diel cycling in CAM<sup>31</sup>. Another salient  
188 gene family in this list is XAP5 CIRCADIAN TIMEKEEPER (XCT), a regulator of circadian  
189 rhythm and disease resistance<sup>32</sup> which was previously identified as undergoing rapid gene family  
190 evolution in *Tillandsia*<sup>32</sup>.

191 For many of these gene families, we also observe circadian- and species-related differential  
192 gene expression (see Results, section 3.5). In these CAM-analogous gene families, evidence for  
193 gene copy number increases in both *T. fasciculata* and *T. leiboldiana* suggest that loss or gain of  
194 gene copies could be contributing to the shift of C3/CAM metabolisms.

195

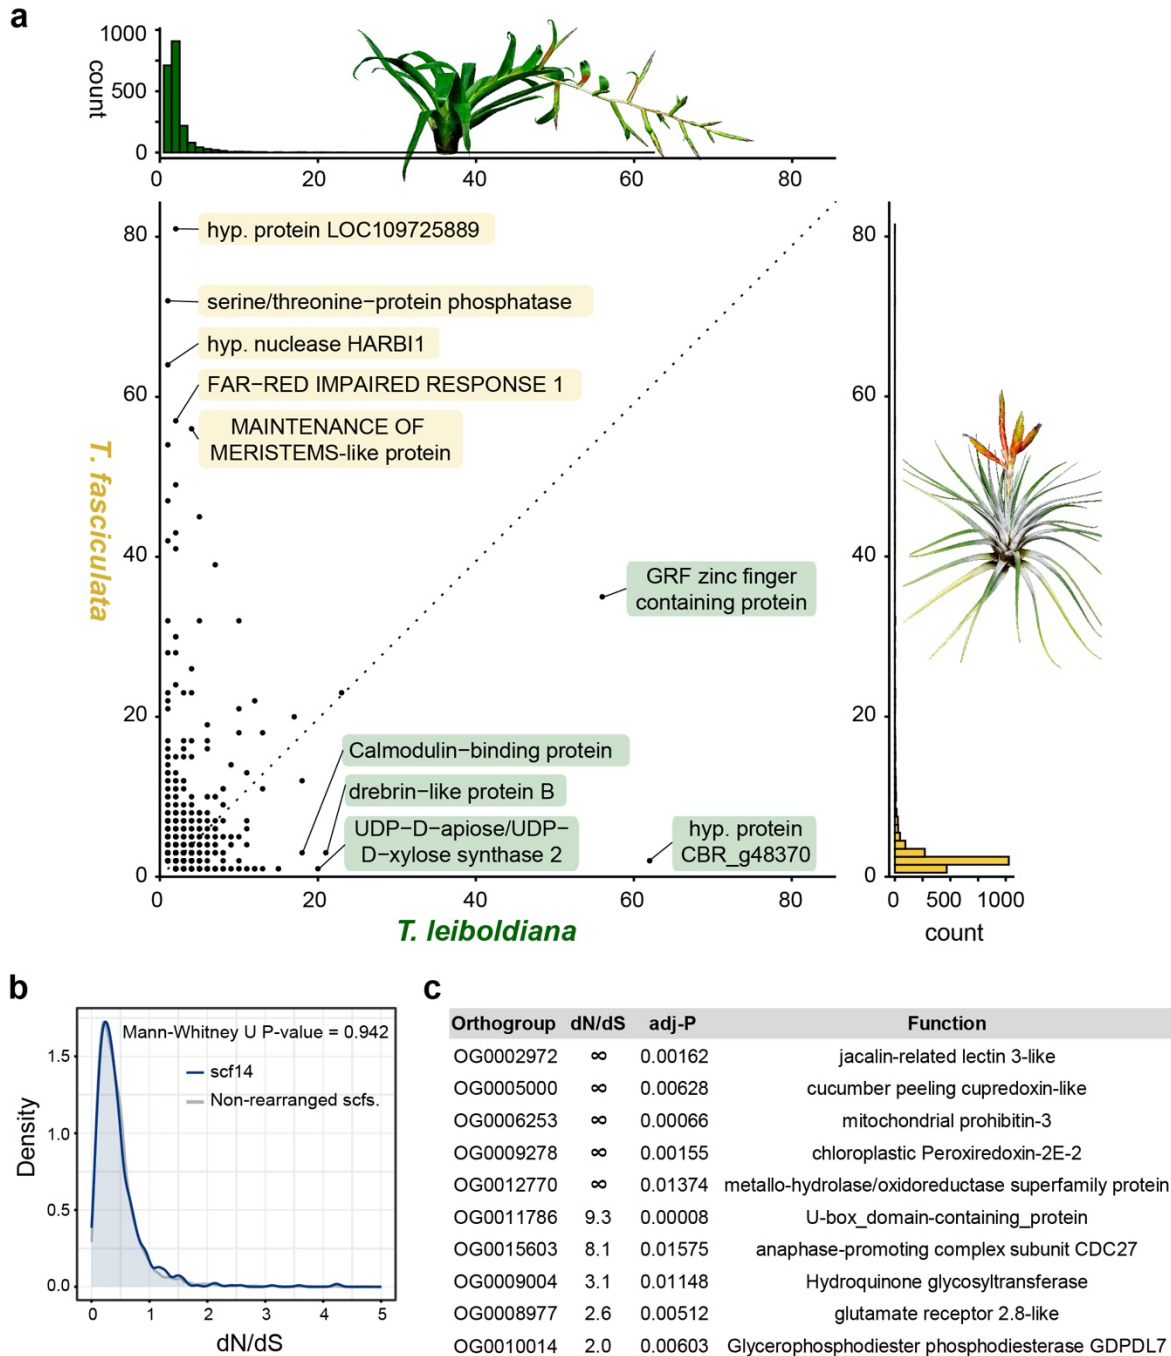

196

197 **Figure 3: a)** Scatterplot: composition of per-species gene counts among orthogroups. Labels indicate the  
 198 functions of the top 5 largest orthogroups in each species. Upper histogram: distribution of per-orthogroup  
 199 gene count in *T. fasciculata*. Lower histogram: distribution of per-orthogroup gene count in *T. leiboldiana*.  
 200 **b)** Distribution of  $d_N/d_S$  values of one-to-one orthologs across non-rearranged scaffolds (grey profile) and  
 201 scaffold 14 in *T. leiboldiana* (blue profile), which is the result of a fusion. **c)** Top 10 single-copy orthogroups  
 202 with highest significant  $d_N/d_S$  values and their functions. Infinite  $d_N/d_S$  values characterize genes which  
 203 accumulated no synonymous substitutions due to the young divergence between the two species. Further  
 204 explanation about the biological significance of these functions can be found in SI Note 9.

### 205 3.4. Adaptive sequence evolution

206

207 Adaptive sequence evolution was evaluated in 9,077 orthologous gene pairs using the non-  
208 synonymous to synonymous substitution ratio ( $\omega = d_N/d_S$ ). Little among-scaffold variation in  $d_N/d_S$   
209 was observed, with per-scaffold median  $d_N/d_S$  values ranging from 0.32 to 0.39 in *T. fasciculata*  
210 and 0.31 to 0.4 in *T. leiboldiana* (Fig. S4a). Regions of large chromosomal rearrangement such as  
211 the fused scaffold 14 in *T. leiboldiana* do not exhibit strong signatures of fast coding sequence  
212 evolution (Fig. 3b), though for Translocation 1,  $d_N/d_S$  values are slightly yet significantly lower  
213 for scaffold 13 in *T. fasciculata* and scaffold 19 in *T. leiboldiana* (Fig. S4b, SI Note 6).

214 Among the 9,077 orthologous gene pairs, 13 candidates (0.21%) exhibit a significant  $\omega >$   
215 1 (Fig. 3c, Table S6, SI Note 9). Notably, we recover a significant signal in a  
216 glycerophosphodiester phosphodiesterase (GDPDL-7). GDPDL's are involved in cell wall  
217 cellulose accumulation and pectin linking, and play a role in trichome development<sup>33</sup>, a main trait  
218 differentiating the two species and more broadly, green and grey *Tillandsia*.

219 A glutamate receptor (GLR) 2.8-like also exhibits a significant  $\omega > 1$ . By mediating  $Ca^{2+}$   
220 fluxes, GLRs act as signalling proteins and mediate a number of physiological and developmental  
221 processes in plants<sup>34</sup>, including stomatal movement<sup>35</sup>. Although it is associated with drought-stress  
222 response in *Medicago trunculata*<sup>36</sup>, the specific function of GLR2.8 still remains unknown.

223

### 224 3.5. Co-expression analyses

225

226 To study gene expression differences linked to CAM/C3 shifts, we performed a time-series  
227 RNA-seq experiment using six plants of each species (Table S1), sampled every four hours in a  
228 circadian cycle. We recovered 907 genes with a differential expression (DE) profile between *T.*

229 *fasciculata* and *T. leiboldiana* across time points. GO term enrichment revealed many CAM-  
230 related functions such as malate and oxaloacetate transport, circadian rhythm, light response, water  
231 and proton pumps, sucrose and maltose transport and starch metabolism (Table S7). Nine of 22  
232 genes reported by De La Harpe et al. 2020 as candidates for adaptive sequence evolution during  
233 C3 / CAM transitions in *Tillandsia* were recovered in this subset (Table S7). Core CAM enzymes  
234 phosphoenolpyruvate carboxylase (PEPC) and phosphoenolpyruvate carboxylase kinase (PEPC  
235 kinase) display clear temporal expression cycling in *T. fasciculata* (Fig. 4c, S5). However, PEPC  
236 kinase also shows an increase in expression in *T. leiboldiana* (Fig. S5), a phenomenon that has  
237 been documented before in C3 *Tillandsia*<sup>36</sup> and also in other plant systems with a recent shift to  
238 CAM<sup>37</sup>.

239 Clustering analysis distributed DE genes across seven clusters with sizes ranging from 209  
240 to 38 genes (Table S7). CAM-related genes were distributed across six of seven clusters,  
241 highlighting the diversity of expression profiles associated with CAM (Fig. S6). While core CAM  
242 genes (see Fig. 5) are mainly found in cluster 5, we find malate transporters in cluster 1, circadian  
243 regulators in clusters 2 and 3, sugar transport in clusters 3 and 6, and vacuolar transport regulators  
244 in clusters 2, 4 and 6. Cluster 7, though not containing any core CAM candidate genes, was  
245 enriched for salt and heat stress response and contains a mitochondrial isocitrate dehydrogenase,  
246 which is predicted to increase in activity in CAM plants<sup>38</sup>.

247 The expression curves of the respective clusters (Fig. S6), demonstrate a complex web of  
248 expression changes between CAM and C3. Generally, we find the following patterns: (i) an overall  
249 increase in expression across all timepoints in the CAM species compared to the C3 species  
250 (stomatal regulation, starch metabolism, drought stress response - clusters 2,5 and 6), (ii) an overall  
251 increase in expression in the C3 species (malate transmembrane transport, aquaporins, vacuolar

252 transport regulators - clusters 4 and 7), (iii) switches from a linear time signal to a circadian pattern  
253 (PEPC), and (iv) amplifications of circadian patterns in one species compared to the other (PEPC  
254 Kinase, cluster 3).

255

### 256 3.5.1. Differentially expressed genes have more TE insertions

257

258 To investigate whether TE activity and differential gene expression are associated in  
259 *Tillandsia*, we tested whether intronic TE insertions are significantly enriched in DE genes in both  
260 species. Genic TE insertions are generally more common in *T. leiboldiana* than in *T. fasciculata*,  
261 further highlighting the increased TE dynamics in this species observed across the entire genome  
262 (See Results section 3.2.). While DE genes in both genomes contain a similar proportion of genes  
263 with one or more transposable element insertions in intronic regions compared to the full gene set,  
264 the average number of TE insertions per gene is significantly higher in DE than in non-DE genes  
265 (Table 1). An elevated intronic TE insertion rate in DE genes, both in the CAM and C3 species,  
266 points at the potential role of TE dynamics providing expression changes that lead to more CAM-  
267 or C3-like circadian profiles.

Table 1: Statistical test results on TE insertions in DE versus non-DE genes

| <i>Presence of TE insertions</i>            |                              |                                           |                        |
|---------------------------------------------|------------------------------|-------------------------------------------|------------------------|
|                                             | DE genes with a TE insertion | Total number of genes with a TE insertion | Chi-square p-value     |
| In <i>T. fasciculata</i>                    | 473 (52 %)                   | 15844 (50 %)                              | 0.2324                 |
| In <i>T. leiboldiana</i>                    | 472 (54.6 %)                 | 18251 (54.6 %)                            | 0.9645                 |
| <i>Average TE insertion counts per gene</i> |                              |                                           |                        |
|                                             | in DE genes                  | in non-DE genes                           | Mann-Whitney U p-value |
| In <i>T. fasciculata</i>                    | 3.66                         | 2.88                                      | 0.0179                 |
| In <i>T. leiboldiana</i>                    | 4.2                          | 3.27                                      | 0.0159                 |

268

### 269 3.5.2. Differentially expressed genes belong more often to multi-copy orthogroups

270

271 To investigate the consequences of gene family evolution on gene expression, we tested  
272 whether the proportion of multi-copy orthogroups underlying DE genes was significantly elevated  
273 to that of the whole-genome set of orthogroups in both species (Fig. 4b, SI Note 10). The 907 DE  
274 genes in *T. fasciculata* are found in 738 orthogroups containing a total of 2,141 and 910 genes in  
275 *T. fasciculata* and *T. leiboldiana*, respectively. Genes from multi-copy orthogroups are more likely  
276 to be differentially expressed: while multi-copy orthogroups account for 24 % of all orthogroups  
277 in the genome, they represent 31 % of DE genes. This difference is primarily explained by a 3.2x  
278 larger proportion of multi-copy orthogroups with a larger family size in *T. fasciculata* than in *T.*  
279 *leiboldiana* in the DE subset compared to the whole genome (Chi-square  $P = 1.59e^{-66}$ ).

280 Reciprocally, the DE analysis on the *T. leiboldiana* genome (See SI Note 10) resulted in  
281 836 DE genes belonging to 714 orthogroups, of which 489 overlap with the DE orthogroups  
282 resulting from the analysis on the *T. fasciculata* genome. As in the analysis on the *T. fasciculata*  
283 genome, we find that orthogroups with a larger family size in *T. leiboldiana* are enriched among  
284 differentially expressed genes. This suggests that gene families undergoing expansion or  
285 contraction play a role in time-specific gene expression, in part related to photosynthetic  
286 metabolism, in both species. Additionally, both analyses point at a significant enrichment for  
287 multi-copy orthogroups with equal family sizes in both species, suggesting that also older  
288 duplications preceding the split of *T. fasciculata* and *T. leiboldiana* play a role in day-night  
289 regulatory evolution. This highlights the importance not only of novel, but also ancient variation  
290 in fuelling trait evolution in *Tillandsia*.

291

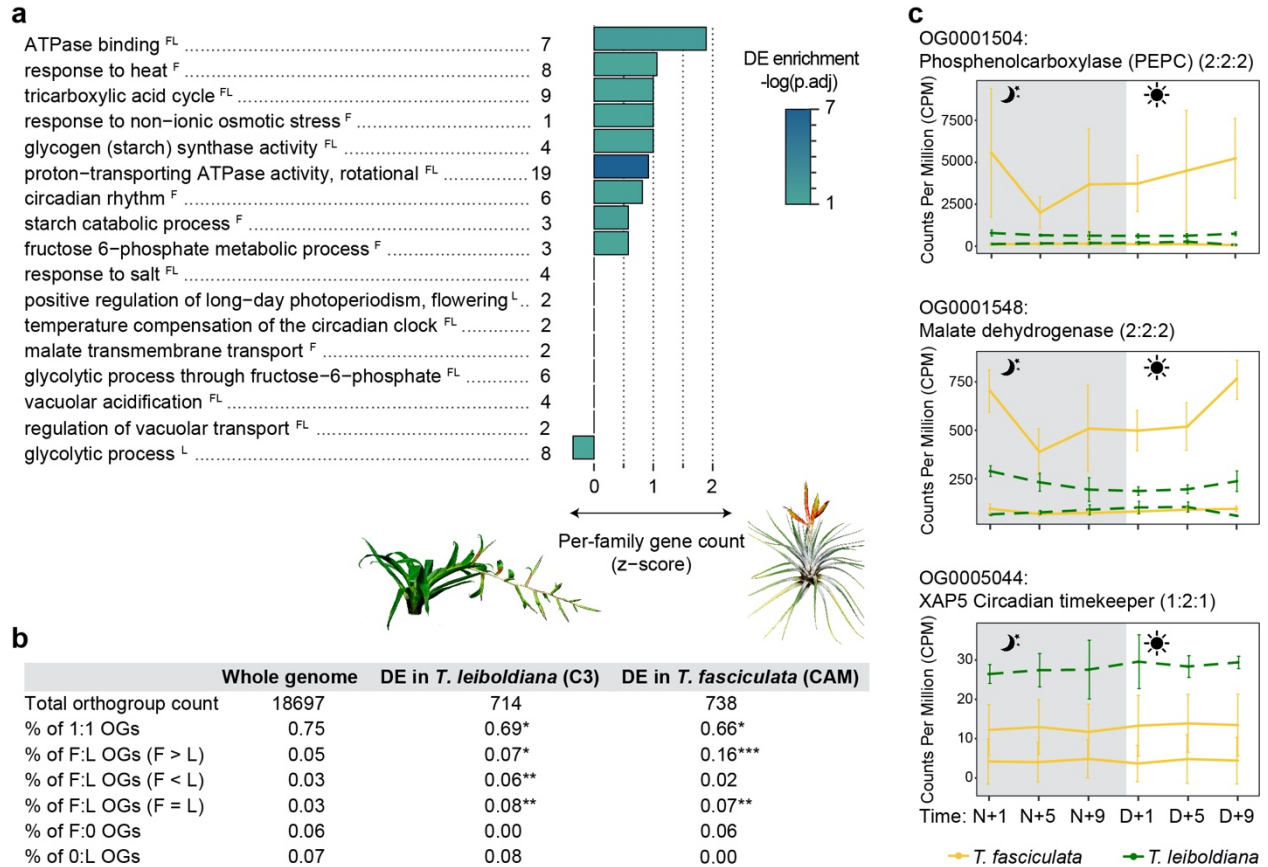

292

293 **Figure 4: a)** CAM-related enriched GO terms among differentially expressed (DE) genes between *T.*  
 294 *fasciculata* and *T. leiboldiana*. The genome in which a GO term has been found to be enriched among DE  
 295 genes is shown by <sup>F</sup> and <sup>L</sup> for *T. fasciculata* and *T. leiboldiana*, respectively. The family size difference for  
 296 the underlying orthogroups is represented as a Z-score: a negative score indicates a tendency towards gene  
 297 families with larger size in *T. leiboldiana* than in *T. fasciculata*, and vice versa. The p-value displayed  
 298 represents the significance of the GO-term enrichment among DE genes in *T. fasciculata*, unless the term  
 299 was only enriched in *T. leiboldiana*. The number of DE genes underlying each function is shown next to the  
 300 GO-term name. **b)** Proportion of orthogroup types by gene family size relationship between *T. fasciculata*  
 301 (F) and *T. leiboldiana* (L) across the whole genome and in DE orthogroups in each species. A chi-square  
 302 test was applied to all categories between the whole genome and each DE subset. Contribution of each  
 303 category to the total Chi-square score is indicated as follows: \*2-10 %, \*\*10-50%, \*\*\*50-100% **c)**  
 304 Examples of the circadian expression of individual CAM-related gene families (PEPC, MDH and XCT)  
 305 displayed at the orthogroup level. We show two families with older duplications preceding the split of *T.*  
 306 *fasciculata* and *T. leiboldiana* (PEPC and MDH) and one gene family with a recent duplication in *T.*  
 307 *fasciculata* (XCT).

308

309 Certain CAM-related biological functions appear associated with gene family expansion

310 or contraction (Fig. 4a). Most notable is the unequal number of functions tending to larger gene



311 families in *T. fasciculata* than in *T. leiboldiana* (nine versus one). Functions associated with V-  
312 ATPase proton pumps especially tend to have larger gene family size in *T. fasciculata* than in *T.*  
313 *leiboldiana* (ATPase binding, proton-transporting ATPase activity).

314 Examples of CAM-related, differentially expressed genes that belong to multi-copy  
315 orthogroups are (i) XAP5 CIRCADIAN TIMEKEEPER (XCT), which has an extra copy in *T.*  
316 *fasciculata*, (ii) a family of malate dehydrogenase (MDH) with two copies in both species, and  
317 (iii) core CAM enzyme Phosphoenolpyruvate carboxylase (PEPC), which shares an ancient  
318 duplication among monocots<sup>39</sup> (Fig. 4c). A candidate gene family with larger gene family size in  
319 *T. leiboldiana* is a probable aquaporin PIP2-6 (OG0005047, Fig. S7), which is involved in water  
320 regulation and follows a circadian pattern in pineapple (*A. comosus*)<sup>40</sup>.

321

#### 322 4. Discussion

323

324 The sources of variation fuelling trait evolution in rapid radiations have been a long-  
325 standing topic in evolutionary biology<sup>41</sup>. By integrating comparative genomics using *de novo*  
326 assembly and in-depth gene expression analyses of two *Tillandsia* species representing a CAM/C3  
327 shift, we found support for TE dynamics, gene family expansion and adaptive sequence evolution  
328 as drivers of trait evolution (Fig. 5).

329 Differences between the two genomes related to a CAM/C3 shift can be primarily found  
330 on the regulatory level, with DE genes between species across a circadian cycle significantly  
331 enriched for many CAM-related functions. These reveal a complex web of underlying expression  
332 changes (Fig. S6). Genes underlying the same function can show multiple types of expression  
333 changes: salt stress response genes both increase and decrease in expression in the CAM species,

334 while circadian rhythm regulators show all possible pattern changes and are widely distributed  
335 across co-expression clusters. These findings emphasize the complexity of CAM regulation,  
336 lacking both a master regulator and a clear direction of expression changes<sup>42,43</sup>.

337         Though we observe a karyotype difference of 6 chromosome pairs between *T. fasciculata*  
338 and *T. leiboldiana* and identified one fusion in the *T. leiboldiana* assembly, along with two  
339 reciprocal translocations, we did not find detectable consequences of large-scale rearrangements  
340 for either functional diversification or adaptation in *Tillandsia* unlike other studies<sup>5,43</sup> (Fig. 3b, S4,  
341 S6, SI Note 10, but see SI Note 6 and 11).

342         We did identify relevant associations, however, between shorter structural variants and trait  
343 evolution in *Tillandsia*. While TE insertions in genic regions are overall more common in *T.*  
344 *leiboldiana*, both species showed significantly elevated transposition rates in differentially  
345 expressed genes, suggesting a potential role of TEs in modifying gene regulation towards the  
346 evolution of a CAM/C3 shift.

347         Gene family expansion has been previously witnessed in CAM lineages<sup>5,44</sup> and suggested  
348 as a driver of CAM evolution<sup>45</sup>. Strikingly, the subset of differentially expressed genes was  
349 significantly enriched for multicopy gene families. Several enriched CAM-related functions show  
350 a bias towards expanded gene families in *T. fasciculata* (circadian rhythm, vacuolar ATPase  
351 activity, tricarboxylic acid cycle and starch metabolism), and glycolysis showed a bias towards  
352 expansion in *T. leiboldiana* (Fig. 4a). More ancient duplications, preceding the split of *T.*  
353 *fasciculata* and *T. leiboldiana* are also significantly associated with day-night expression changes  
354 (Fig. 4b).

355

356

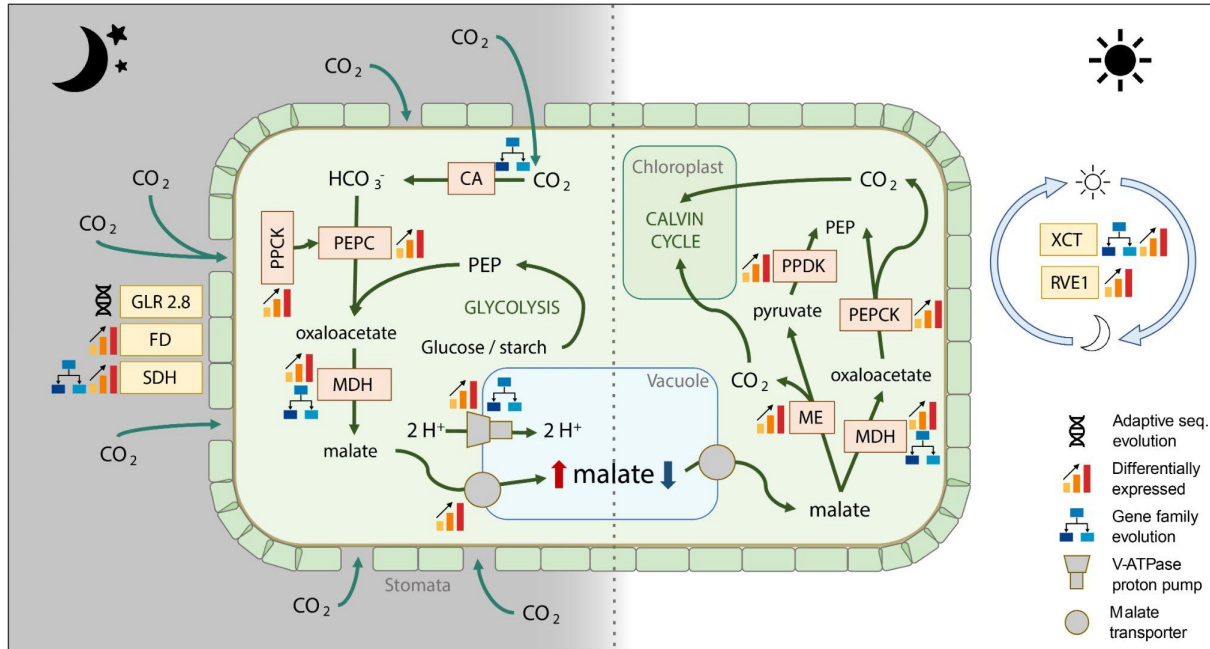

357 **Figure 5:** Pathway of Crassulacean Acid Metabolism (CAM), highlighting underlying genes detected in  
 358 this study as differentially expressed, with gene family expansion and/or with signature of adaptive  
 359 sequence evolution. CO<sub>2</sub> is absorbed at night and first converted to HCO<sub>3</sub><sup>-</sup> by carbonic anhydrase (CA).  
 360 Then, it is converted to malate by carboxylating phosphoenol pyruvate (PEP), a key component of the  
 361 glycolysis. In a first step, PEP carboxylase (PEPC) converts PEP to oxaloacetate, after being activated by  
 362 PEPC kinase. In a second step, malate dehydrogenase (MDH) converts oxaloacetate to malate. Malate is  
 363 then transported into the vacuole by two possible transporters, either a tonoplast dicarboxylate transporter  
 364 or an aluminum-activated malate transporter, which are assisted by V-ATPase proton pumps. During the  
 365 day, the accumulated malate becomes the main source of CO<sub>2</sub> for photosynthesis. This allows the stomata  
 366 to remain closed, which greatly enhances the water use efficiency (WUE) of the plant. Malate is again  
 367 transported out of the vacuole and reconverted to PEP by two possible mechanisms. One possibility is that  
 368 malate is converted to oxaloacetate by MDH, and then decarboxylated to PEP and CO<sub>2</sub> by PEP  
 369 carboxykinase (PEPCK). Another option is that malate is decarboxylated into pyruvate and CO<sub>2</sub> by malic  
 370 enzyme (ME). Pyruvate is then reconverted into PEP by pyruvate orthophosphate dikinase (PPDK). The  
 371 CO<sub>2</sub> will cycle through the Calvin cycle and generate sugars. Though it is known that in *A. comosus* the  
 372 main decarboxylase is PEPCK, we recovered circadian differential gene expression in both  
 373 decarboxylases, and therefore display both possible pathways. While enzymes that are part of the CAM  
 374 core pathway are highlighted in orange boxes, regulators of stomatal movement and circadian clock are  
 375 highlighted in yellow boxes.

376

377 The expression curves of DE multicopy gene families with a potential link to CAM reveal  
 378 a multitude of expression behaviours (Fig. 4c), which supports that complex regulatory evolution  
 379 on the transcriptional level underlie CAM evolution. Our findings suggest that gene family

380 evolution played a significant role in modulating regulatory changes underlying a C3 to CAM shift  
381 in *Tillandsia*. As gene family expansion leads to increased redundancy, selection on the individual  
382 gene copies and their expression relaxes, facilitating changes in expression leading to the evolution  
383 of a more CAM or C3-like expression profile<sup>46</sup>.

384 Candidate genes under positive selection underlie a broad array of functions and had no  
385 immediate link to CAM photosynthesis, except for glutamate receptor 2.8-like (OG0008977), a  
386 potential regulator of stomatal movement<sup>35</sup>. The lack of overlap between regulatory and adaptive  
387 sequence evolution is in line with previously proposed mechanisms of CAM evolution largely  
388 relying on regulatory changes<sup>39</sup> (but see SI Note 10).

389 The two *de novo* assemblies presented in this study are the first tillandsioid and third  
390 bromeliad genomes published so far. To our knowledge, these are also the first CAM/C3 species  
391 pair assembled so far at such short evolutionary timescales. Despite both genomes exhibiting one  
392 of the highest TE contents reported to date for a non-polyploid plant species<sup>47</sup>, the joint use of  
393 long-read sequencing and chromatin conformation capture successfully led to highly contiguous  
394 assemblies with high-quality gene sets (SI Note 4). Along with other recently developed resources  
395 for Bromeliaceae<sup>48,49</sup>, these genomes will be crucial in future investigations of this highly diverse  
396 and species-rich plant family, and in further studies of CAM evolution.

397 Our analyses reveal genomic changes of all scales between two members of an adaptive  
398 radiation representing a recent CAM/C3 shift (but see SI Note 11). Large scale rearrangements  
399 observed so far seem unlinked from functional divergence, more likely affecting reproductive  
400 isolation<sup>50,51</sup>. We however find a clear link between one of the fundamental key innovation traits  
401 of this radiation, CAM, and regulatory changes, which have potentially been driven by smaller-  
402 scale structural variants<sup>52</sup> such as gene family expansion and transposable element activity (Fig.

403 5). Our findings support a crucial role of small-scale genome evolution in shaping novel variation  
404 that fuels trait evolution in adaptive radiation.

405

## 406 **5. Online Methods**

407

### 408 **5.1. Flow cytometry and cytogenetic experiments**

409

#### 410 **5.1.1. Genome size measurements**

411 Approximately 25 mg of fresh leaf material was co-chopped according to the chopping method of  
412 Galbraith et al. (1983)<sup>53</sup> together with an appropriate reference standard (*Solanum*  
413 *pseudocapsicum*, 1.295 pg/1C)<sup>54,55</sup> in Otto's I buffer<sup>56</sup>. After filtration through a 30 µm nylon mesh  
414 (Saatile Hitech, Sericol GmbH, Germany) and incubation with RNase A (0.15mg/ml, Sigma-  
415 Aldrich, USA) at 37°C, Otto's II buffer<sup>56</sup> including propidium iodide (PI, 50mg/L, AppliChem,  
416 Germany) was added. Staining took place in the refrigerator for at least one hour or up to over-  
417 night. Measurement was conducted on a CyFlow ML or a CyFlow Space flow cytometer  
418 (Partec/Sysmex, Germany) both equipped with a green laser (532nm, 100mW, Cobolt AB,  
419 Sweden). The fluorescence intensity (FI) of 10,000 particles were measured per preparation and  
420 the 1C-value calculation for each sample followed the equation:  $1C_{Obj} = (FI_{peak\ mean_{G1\ Obj}} / FI_{peak\ mean_{G1\ Std}}) \times 1C_{Std}$   
421

422

#### 423 **5.1.2. Karyotyping**

424 Actively growing root meristems of genome assembly accessions (see Table S1) were harvested  
425 and pretreated with 8-hydroxyquinoline for 2 hrs at room temperature and 2 hrs at 4°C. The roots

426 were then fixed in Carnoy's fixative (3 : 1 ethanol : glacial acetic acid) for 24 hours at room  
427 temperature and stored  $-20^{\circ}\text{C}$  until use. Chromosome preparations were made after enzymatic  
428 digestion of fixed root meristems as described in Jang and Weiss-Schneeweiss (2015)<sup>57</sup>.  
429 Chromosomes and nuclei were stained with 2 ng/ $\mu\text{l}$  DAPI (4',6-diamidino-2-2-phenylindole) in  
430 Vectashield antifade medium (Vector Laboratories, Burlingame, CA, USA). Preparations were  
431 analyzed with an AxioImager M2 epifluorescent microscope (Carl Zeiss) and images were  
432 captured with a CCD camera using AxioVision 4.8 software (Carl Zeiss). Chromosome number  
433 was established based on analyses of several preparations and at least five intact chromosome  
434 spreads. Selected images were contrasted using Corel PhotoPaint X8 with only those functions  
435 that applied equally to all pixels of the image and were then used to prepare karyotypes.

436

## 437 **5.2. Genome Assembly**

438

### 439 **5.2.1. Plant material selection and sequencing**

440

441 Genome assemblies were constructed from the plant material of one accession per species  
442 (see Table S1). The accessions were placed in a dark room for a week to minimize chloroplast  
443 activity and recruitment, after which the youngest leaves were collected and flash frozen with  
444 liquid nitrogen. High molecular weight extraction for ultra-long reads, SMRTbell library  
445 preparation and PacBio Sequel sequencing was performed by Dovetail Genomics<sup>TM</sup> (now Cantata  
446 Bio). Dovetail Genomics<sup>TM</sup> also prepared Chicago<sup>58</sup> and Hi-C<sup>59</sup> libraries which were sequenced  
447 as paired-end 150bp reads on an Illumina HiSeq X instrument. Additional DNA libraries were

448 prepared for polishing purposes using Illumina's TruSeq PCR-free kit, which were sequenced on  
449 a HiSeq2500 as paired-end 125 bp reads at the Vienna BioCenter Core Facilities (VBCF), Austria.

450 RNA-seq data of *T. fasciculata* used for gene annotation was sampled, sequenced and  
451 analyzed in De La Harpe et al. 2020 under SRA BioProject PRJNA649109. For gene annotation  
452 of *T. leiboldiana*, we made use of RNA-seq data obtained during a similar experiment, where  
453 plants were kept under greenhouse conditions and sampled every 12 hours in a 24-hour cycle.  
454 Importantly, while the *T. fasciculata* RNA-seq dataset contained three different genotypes, only  
455 clonal accessions were used in the *T. leiboldiana* experiment. For *T. leiboldiana*, total RNA was  
456 extracted using a QIAGEN RNeasy® Mini Kit, and poly-A capture was performed at the Vienna  
457 Biocenter Core Facilities (VBCF) using a NEBNext kit to produce a stranded mRNA library. This  
458 library was sequenced on a NovaSeq SP as 150 bp paired end reads.

459 For both species, sequencing data from different time points and accessions were merged  
460 into one file for the purpose of gene annotation. Before mapping, the data was quality-trimmed  
461 using AdapterRemoval<sup>60</sup> with default options (--trimns, --trimqualities). We allowed for  
462 overlapping pairs to be collapsed into longer reads.

463

### 464 **5.2.2. First draft assembly and polishing**

465

466 We constructed a draft assembly using long-read PacBio data with CANU v1.8<sup>61</sup> for both  
467 species. To mitigate the effects of a relatively low average PacBio coverage (33x), we ran two  
468 rounds of read error correction with high sensitivity settings (corMhapSensitivity=high  
469 corMinCoverage=0 corOutCoverage=200) for *T. fasciculata*. Additionally, we applied high  
470 heterozygosity (correctedErrorRate=0.105) settings, since K-mer based analyses pointed at an

471 elevated heterozygosity in this species (See SI Note 2, Figures S10-11), and memory optimization  
472 settings (corMhapFilterThreshold=0.0000000002 corMhapOptions=" --repeat-idf-scale 50"  
473 mhapMemory=60g mhapBlockSize=500).

474         Given that the coverage of *T. leiboldiana* PacBio averaged 40x, we limited error correction  
475 for this species to only one round. CANU was run with additional settings accommodating for  
476 high frequency repeats (ovlMerThreshold=500) and high sensitivity settings as mentioned above.

477         To minimize the retainment of heterozygous sequences as haplotigs in *T. fasciculata* (see  
478 SI Note 2), we reassigned allelic contigs using the pipeline Purge Haplotigs<sup>62</sup>. Raw PacBio data  
479 was mapped to the draft assembly produced in the previous step with minimap2<sup>63</sup>, before using  
480 the Purge Haplotigs pipeline.

481         Since the size of the *T. leiboldiana* draft assembly indicates, together with previous  
482 analyses, that this species is largely homozygous (SI Note 2, Figures S10-11), we did not include  
483 a purge\_haplotigs step. However, we did make use of the higher average coverage of the *T.*  
484 *leiboldiana* PacBio data to polish the assembly with two rounds of PBMM v.1.0 and Arrow v2.3.3  
485 (Pacific Biosciences).

486

### 487         **5.2.3. Scaffolding and final polishing**

488

489         Scaffolding of both assemblies was performed in-house by Dovetail Genomics<sup>TM</sup> using  
490 Chicago and Hi-C data and the HiRise scaffolding pipeline<sup>58</sup>. To increase base quality and correct  
491 indel errors, we ran additional rounds of polishing with high-coverage Illumina data (See above,  
492 section 2.1.) using Pilon v1.22<sup>64</sup>. The Illumina data was aligned to the scaffolded assembly using  
493 BWA-MEM<sup>65</sup>, and then Pilon was run on these alignments. We evaluated the result of each round



494 using BUSCO v.3<sup>66</sup> with the liliopsida library and proceeded with the best version. For *T.*  
495 *fasciculata*, polishing was performed twice, fixing SNPs and indels. We did not fix small structural  
496 variation in this genome due to the relatively low coverage (35x) of Illumina data. For *T.*  
497 *leiboldiana*, one round of polishing on all fixes (SNPs, indels and small structural variants) resulted  
498 in the highest BUSCO scores.

499

## 500 **5.3. Annotation**

501

### 502 **5.3.1. TE annotation and repeat masking**

503

504 *De novo* TE annotation of both genome assemblies was performed with EDTA v.1.8.5<sup>25</sup>  
505 with option `-sensitive`. To filter out genes that have been wrongly assigned as TEs, *A. comosus*  
506 (pineapple) coding sequences<sup>28</sup> were used in the final steps of EDTA.

507 Using the species-specific TE library obtained from EDTA, we masked both genomes  
508 using RepeatMasker v.4.0.7<sup>69</sup>. Importantly, we excluded all TE annotations marked as “unknown”  
509 for masking to prevent potentially genic regions flagged as TEs to be masked during annotation.  
510 The search engine was set to NCBI (`-e ncbi`) and simple and low-complexity repeats were left  
511 unmasked (`-nolow`). We produced both hard-masked and soft-masked (`--xsmall`) genomes.

512

### 513 **5.3.2. Transcriptome assembly**

514

515 We constructed transcriptome assemblies for both species using Trinity *de novo* assembler  
516 v.2.4.8.<sup>70</sup> using default parameters starting from the raw mRNA-seq data. These were evaluated  
517 with BUSCO. Additionally, before feeding the transcriptome assemblies to the gene annotation

518 pipeline, we ran a round of masking of interspersed repeats to avoid an overestimation of gene  
519 models due to the presence of active transposases in the RNA-seq data.

520

### 521 **5.3.3. Gene prediction and functional annotation**

522

523 Gene models were constructed using a combination of BRAKER<sup>71</sup> v.2.1.5 and MAKER2<sup>72</sup>  
524 v.2.31.11. Starting with BRAKER, we obtained splicing information from RNA-seq alignments  
525 to the masked genome as extrinsic evidence using the *bam2hints* script of AUGUSTUS v.3.3.3<sup>73</sup>.  
526 A second source of extrinsic evidence for BRAKER were single-copy protein sequences predicted  
527 by BUSCO when run on the masked genomes in genome mode with option --long. Predictions  
528 made by BRAKER were evaluated with BUSCO and with RNA-seq alignments.

529 Subsequently, we built our final gene predictions using MAKER2. As evidence, we used  
530 (1) the gene models predicted by BRAKER, (2) a transcriptome assembly of each respective  
531 species (see above section 3.2.), (3) a protein sequence database containing proteins of *Ananas*  
532 *comosus comosus* (F135)<sup>28</sup> and *Ananas comosus bracteatus* (CB5)<sup>75</sup> and manually curated  
533 swissprot proteins from monocot species (64,748 sequences in total) and (4) a GFF file of complex  
534 repeats obtained from the masked genome (see above section 3.1.) and an extended repeat library  
535 containing both the EDTA-produced *Tillandsia*-specific repeats and the monocot repeat library  
536 from RepBase (7,857 sequences in total). By only providing masking information of complex  
537 repeats and setting the model organism to “simple” in the repeat masking options, hardmasking in  
538 MAKER2 was limited to complex repeats while simple repeats were soft-masked, which makes  
539 these available for gene prediction. MAKER2 predicts genes both *ab initio* and based on the given  
540 evidence using AUGUSTUS.

541 We evaluated the resulting set of predicted gene models by mapping the RNA-seq data  
542 (section 2.1.) back to both the transcript and full gene model sequences and running BUSCO in  
543 transcriptome mode. We also calculated the proportion of masked content in these gene models to  
544 ascertain that MAKER2 hadn't predicted TEs as genes. A second run of MAKER, which included  
545 training AUGUSTUS based on the predicted models from the first round, resulted in lower  
546 BUSCO scores and was not further used.

547 We functionally annotated the final set of gene models in Blast2Go v.5.2.5<sup>76</sup> using the  
548 Viridiplantae database.

549

#### 550 **5.4. Inferring gene orthology**

551

552 Orthology between gene models of *T. fasciculata*, *T. leiboldiana* and *Ananas comosus*  
553 was inferred using Orthofinder v.2.4.0<sup>29</sup>. Protein sequences produced by MAKER2 of inferred  
554 gene models were used for *T. fasciculata* and *T. leiboldiana*. For *A. comosus*, the publicly  
555 available gene models of F153 were used (SRA BioProject PRJNA371634). The full Orthofinder  
556 pipeline was run without additional settings. Counts per orthogroup and the individual genes  
557 belonging to each orthogroup were extracted from the output file  
558 `Phylogenetic_Hierarchical_Orthogroups/N0.tsv`.

559 Orthofinder was run a second time on gene models present only on main contigs (See  
560 Results). For each gene model, the longest isoform was selected, and gene models with protein  
561 sequences shorter than 40 amino acids were removed. This resulted in 27,024, 30,091 and  
562 31,194 input sequences for *A. comosus*, *T. fasciculata* and *T. leiboldiana* respectively. Then, the  
563 steps mentioned above were repeated.

564

## 565 **5.5. Gene model assessment and curation**

566

567           Gene model sets were assessed and curated using several criteria. Gene models with  
568 annotations indicating a repetitive nature (transposons and viral sequences) together with all their  
569 orthologs were marked with “NO\_ORTHOLOGY” in the GFF file and excluded from downstream  
570 analyses. Using the per-exon expression data obtained in our mRNA-seq experiment (see below,  
571 section 10.) and information gathered on the length of the CDS and the presence / absence of a  
572 start and stop codon, we further classified our gene models into ROBUST and NOT-ROBUST  
573 categories. A gene model was considered ROBUST (i) if all exons are expressed or, (ii) if both  
574 start and stop codons are present and the CDS has a minimum length of 50 amino-acids.

575

## 576 **5.6. Analyzing TE class abundances**

577

578           By rerunning EDTA with step --anno, we obtained TE abundances and detailed annotation  
579 of repetitive content for the whole assembly. Per-contig abundances of each class were calculated  
580 with a custom python script (available at <https://github.com/cgrootcrego/>). Using this curated TE  
581 library, the assemblies were masked again with RepeatMasker for downstream analyses. The  
582 resulting TE class abundances reported by RepeatMasker were then compared between species  
583 and reported.

584

## 585 **5.7. Spatial distribution of repetitive, genic and GC content**

586

587           The spatial distribution of genes, transposable elements and GC content as shown in Fig.  
588 2a, was analysed on a per-window basis, using windows of 1 Mb. Gene counts were quantified  
589 as the number of genes starting in every window, based on genes with assigned orthology,  
590 including both single and multicopy gene models. Repetitive content was measured as the  
591 proportion of masked bases in each window, stemming from the hard-masked assembly using the  
592 curated TE library. Per-window gene counts and proportion of repetitive bases was then  
593 visualized using the R package *circize*<sup>78</sup>. GC content was calculated as the proportion of G and  
594 C bases per 1 Mb windows. Correlation between genic, repetitive and GC content was calculated  
595 and tested for significance using the Kendall Rank Correlation Coefficient, after testing for  
596 normality using the Shapiro-Wilk test.

597           Repetitive, GC and gene content as shown in Fig. 2b was estimated directly from the  
598 soft-masked reference genomes using 100 kb non-overlapping sliding windows as described in  
599 Leroy et al. 2021<sup>79</sup>. TE content corresponds to the proportion of soft-masked positions per  
600 window, using the curated TE library (see above, section 6.) as basis for soft-masking in  
601 RepeatMasker. As compared to the version of Leroy et al. 2021, this script was modified to  
602 estimate GC content in repetitive regions only. In addition to this, we estimated the genic  
603 fraction by considering the total number of genomic positions falling in genes based on the GFF  
604 files (feature = “gene”) divided by the size of the window (100 kb). This estimate was derived  
605 for the same window boundaries as used for GC and TE content to be able to compare all  
606 statistics. The relative per-window proportion of genic bases corresponding to non-robust genes  
607 (see above, section 5) was also estimated by dividing the number of non-robust gene positions  
608 with the total number of gene positions.

609

## 610 **5.8. Synteny between *T. fasciculata* and *T. leiboldiana***

611

612 Synteny was inferred with GENESPACE<sup>30</sup>, using orthology information obtained with  
613 Orthofinder of the gene models from *A. comosus*, *T. fasciculata* and *T. leiboldiana*. This provided  
614 a first, visual graphical to detect large-scale rearrangements. We used GENESPACE with default  
615 parameters, except that we generated the syntenic map (riparian plot) using minGenes2plot=200.  
616 Other methods have also been used to confirm the chromosomal rearrangements and to identify  
617 the genomic breakpoints more precisely (see SI Note 6).

618

## 619 **5.9. Gene family evolution**

620

621 Gene family counts were corrected for multi-copy orthogroups due to unusual coverage  
622 distribution, especially in *T. fasciculata* (see SI Note 7). The distribution of gene counts per  
623 multicopy orthogroup was compared between *T. fasciculata* and *T. leiboldiana* with a non-  
624 parametric test (Mann-Whitney U). Using the log-ratio of per-species gene count, we investigated  
625 which gene families experienced large changes in gene count compared to the background (see SI  
626 Note 8).

627 Functional characterization of multicopy families was done with a GO term enrichment  
628 analysis of the underlying genes using the Fisher's exact test in TopGo<sup>81</sup>. Enrichment analyses  
629 were done on all genes belonging to multicopy orthogroups, on a subset of genes belonging to  
630 families that are larger in *T. fasciculata* and on a subset of genes belonging to families that are  
631 larger in *T. leiboldiana*. The top 100 significantly enriched GO terms were then evaluated. GO

632 terms putatively associated with key innovation traits were used to list multicopy gene families of  
633 interest.

634

## 635 **5.10 d<sub>N</sub>/d<sub>S</sub> analysis**

636

### 637 **5.10.1. On single-copy orthologous pairs**

638

639 One-to-one orthologous genes were subjected to a test of positive selection using the non-  
640 synonymous to synonymous substitution ratio ( $\omega = d_N/d_S$ ). Gene pairs where both genes were  
641 incomplete (missing start and/or stop codon) or where the difference in total length was more than  
642 20 % of the length of either gene were removed to avoid misalignments. We performed codon-  
643 aware alignments using the alignSequences program from MACSE v.2.05<sup>82</sup> with options -  
644 local\_realign\_init 1 -local\_realign\_dec 1 for optimization. Pairwise d<sub>N</sub>/d<sub>S</sub> ratios were estimated  
645 with the codeML function of PAML v.4.9.<sup>60</sup>. Using a single-ratio model across sites and branches  
646 (Nssites = 0, model = 0), we tested for a fixed  $\omega = 1$  as null hypothesis, against an unfixed  $\omega$  as  
647 the alternative hypothesis. Automization of codeML was achieved with a modified script from  
648 AlignmentProcessor<sup>83</sup>. The results of codeML under both the null and alternative model were  
649 compiled and significance of the result was calculated with the likelihood-ratio test<sup>84</sup>. Multiple-  
650 testing correction was applied with the Benjamini-Hochberg method and an FDR threshold of  
651 0.05. Orthologous gene pairs with a d<sub>N</sub>/d<sub>S</sub> ratio larger than one and an adjusted p-value under 0.05  
652 were considered candidate genes under divergent selection.

653 The d<sub>N</sub>/d<sub>S</sub> values of all orthologous gene pairs with five or more variant sites in the MACSE  
654 alignment were used to obtain per-scaffold distributions of d<sub>N</sub>/d<sub>S</sub> values in both genomes. We

655 visualized  $d_N/d_S$  distributions of all main scaffolds in both assemblies with boxplots and used  
656 density plots to visualize the  $d_N/d_S$  distribution in rearranged chromosomes compared to all non-  
657 rearranged chromosomes. To test whether these distributions were significantly different, we ran  
658 a non-parametric test (Mann-Whitney U) between the distribution of each single rearranged  
659 chromosome and that of all non-rearranged chromosomes in each assembly.

660

### 661 **5.10.2. On duplicated orthogroups**

662

663 We also performed tests of selection using  $d_N/d_S$  on all orthogroups that were consisted of  
664 a single gene in *A. comosus* and a duplicated gene in either *T. leiboldiana* (1:1:2), or *T. fasciculata*  
665 (1:2:1). Only orthogroups that maintained this conformation after size correction (SI Note 7) were  
666 used in this analysis. Pairwise alignments were performed between the ortholog of one species and  
667 either paralog of the other species using MACSE. Then,  $\omega$  was estimated in the same way as  
668 mentioned above.

669

## 670 **5.11. RNA-seq experiment capturing CAM and C3 expression differences**

671

### 672 **5.11.1. Experiment set-up and sampling**

673

674 To capture gene expression patterns related to CAM, we designed an RNA-seq experiment  
675 where individuals of *T. fasciculata* (CAM) and *T. leiboldiana* (C3) were sampled at six time points  
676 throughout a 24-hour cycle. Six plants of each species were placed in a PERCIVAL climatic  
677 cabinet at 22 °C and a relative humidity (rH) of 68 % for 4 weeks, with a 12-hour light cycle. Light



678 was provided by fluorescent lamps with a spectrum ranging from 400 to 700 nm. The light intensity  
679 was set at 124  $\mu\text{mol}/\text{m}^2\text{s}$ . The plants acclimatised to these conditions for 4 weeks prior to sampling,  
680 during which they were watered every second day.

681 Leaf material from each plant was sampled every 4 hours in a 24-hour cycle starting one  
682 hour after lights went off. One leaf was pulled out of the base at each time-point without cutting.  
683 The base and tip of the leaf were then removed, and the middle of the leaf immediately placed in  
684 liquid nitrogen, then stored at  $-80\text{ }^\circ\text{C}$ .

685

### 686 **5.11.2. RNA extraction and sequencing**

687

688 Total RNA was extracted using the QIAGEN RNeasy® Mini Kit in an RNase free  
689 laboratory. Samples were digested using the kit's RLT buffer with 1 % Beta-mercaptoethanol.  
690 Elution was done in two steps. The purity and concentration of the extractions was measured using  
691 Nanodrop, and RIN and fragmentation profiles were obtained with a Fragment Analyzer™ system.  
692 RNA libraries were prepared by the Vienna Biocenter Core Facilities (VBCF) using a NEBNext  
693 stranded mRNA kit before sequencing 150-bp paired-end reads on one lane of Illumina NovaSeq  
694 S4.

695

### 696 **5.11.3. RNA-seq data processing**

697

698 The raw RNA-seq data was evaluated with FastQC<sup>85</sup> and MultiQC<sup>86</sup>, then quality trimmed  
699 using AdapterRemoval v.2.3.1<sup>76</sup> with settings `--trimns --trimqualities --minquality 20 --`  
700 `trimwindows 12 --minlength 36`. The trimmed data was then aligned to both the *T. fasciculata* and

701 *T. leiboldiana* genomes using STAR v.2.7.9<sup>18</sup> using GFF files to specify exonic regions. Because  
702 mapping bias was lowest when mapping to *T. fasciculata*, our main analyses have been performed  
703 on the reads mapped to this genome. However, the alignments to *T. leiboldiana* were used for  
704 verification or expansion of the main analysis (SI Note 10).

705

#### 706 **5.11.4. Co-expression analysis**

707

708 We quantified read counts per exon using FeatureCounts from the Subread package  
709 v.2.0.3.<sup>36</sup> for paired-end and reversely stranded reads (-p -s 2). The counts were then summed up  
710 across exons per gene to obtain gene-level counts. The composition of the count data was  
711 investigated with PCA in EdgeR<sup>37</sup>. Then, counts were normalized using the TMM method in  
712 EdgeR, and every gene with a mean cpm < 1 was removed. We ran a differential gene expression  
713 (DE) analysis between species and timepoints in maSigPro<sup>38</sup>, with *T. leiboldiana* (C3) as the  
714 baseline. Significant DE genes were then clustered using the hclust algorithm into modules, with  
715 the number of modules being determined with the K-means algorithm. GO term enrichments were  
716 performed for each cluster using the R package TopGO<sup>29</sup> and expression curves were plotted by  
717 taking the average expression across all replicates per species at each time point with a custom R  
718 script. Expression curves for entire clusters (Fig. S6) were plotted by median-centering the  
719 log(CPM) of each gene and timepoint against the median of all genes at each time point, while  
720 expression curves for individual genes or gene families (Fig. 4c, S5, S7) report average CPM.

721

722

723 **5.12. Intersecting findings of gene family evolution, TE insertion and differential gene**  
724 **expression**

725

726 **5.12.1 Transposable element insertions and differential gene expression**

727

728 Intronic TE insertions were obtained using *bedtools intersect* on the GFF files of the TE  
729 and gene annotations of both species. We used the full transcript length of a gene (feature =  
730 “mRNA” in GFF file) for this analyses, and only applied “known” TE annotations. This resulted  
731 in a dataset reporting the number of TE insertions per gene. We then performed two tests on the  
732 resulting TE counts per gene: (1) whether the proportion of genes with one or more TE insertions  
733 is elevated in DE genes compared to the full gene set (chi-square test), and (2) whether the rate of  
734 TE insertions per gene measured, as the total count of intersections for each gene annotation with  
735 a TE annotation, is elevated in DE genes compared to non-DE genes (Mann-Whitney U test).

736

737 **5.12.2. Gene family evolution and differential gene expression**

738

739 Orthogroups were split based on relative family size in *T. fasciculata* (F) versus *T. leiboldiana*  
740 (L) in the following categories: Single-copy orthogroups (F = 1 : L = 1), orthogroups with family  
741 size larger in *T. fasciculata* (F > L), orthogroups with family size smaller in *T. fasciculata* (F <  
742 L), orthogroups with equal family sizes that are larger than 1 (F = L), and orthogroups unique to  
743 one species (F:0 or 0:L). We counted the number of orthogroups belonging to each category both  
744 for the full orthogroup set and for the subset of orthogroups containing DE genes (DE  
745 orthogroups). We then tested whether counts in each orthogroup category were enriched in DE

746 orthogroups compared to all orthogroups using the chi-square test of independence in R. The  
747 contribution of each category to the total Chi-square score was calculated as  $\frac{r^2}{\chi^2}$ , with  $r$  the  
748 respective residual, and then converted to percentage.

749 To study the effect of the reference genome used on our findings on gene family evolution in  
750 DE genes, we performed the same analysis on read counts obtained from mapping to *T.*  
751 *leiboldiana* (SI Note 10) and combined these findings in resulting statistics and figures.

752

## 753 6. Acknowledgments

754

755 *In memoriam of Christian Lexer – we will treasure your enthusiasm, guidance and memory*  
756 *always.*

757 This work was financially supported by the Austrian Science Fund (FWF) through the doctoral  
758 programme (DK) grant W1225-B20 to a faculty team including O.P., FWF grant P35275 to O.P.,  
759 and by the professorship start-up grant of Christian Lexer at the University of Vienna BE772002.

760 We thank Joachim Hermisson, Magnus Nordborg, Andrew Clark, Nicholas Barton, Virginie

761 Courtier-Orgogozo, John Parsch, Andreas Futschik, Aglaia Szukala, Florian Schwarz, Marta

762 Pelizzolla and Ahmad Muhammad for insightful discussions, advice, and feedback. We thank Gert

763 Bachmann and Eline de Vos for help with the setup of the RNA-seq experiment; Peter Bak,

764 Andreas Franzke, Nils Köster and Helmut & Lieselotte Hromadnik for their generous donations

765 of *Tillandsia* accessions. We also thank Barbara Knickmann, Viktor Vagovics and Manfred

766 Speckmaier for the care of *Tillandsia* plants at the Botanical Garden of the University of Vienna.

767 Computational resources were provided by the Life Science Computer Cluster (LiSC) of the

768 University of Vienna and the Vienna Scientific Cluster.

769

## 770 **7. Author Contributions**

771

772 This study was conceived by CL, JH, OP, TL and CGC. Sampling was conducted by MHJB, WT,  
773 GY and MDH. Laboratory work was conducted by MHJB, SS, TB, LACS and CGC. Cytogenetic  
774 work was performed by HWS and EMT. The RNA-Seq experiment and DE analysis was  
775 conducted under the guidance of KH and OP. Analyses were performed by CGC, JH, GY, TL and  
776 FB. The manuscript was primarily written by CGC and amended following the dedicated reading  
777 and feedback of all co-authors, especially KH, TL and OP.

778

## 779 **8. Data Availability**

780

781 The genome assemblies, annotations and raw PacBio and Illumina sequences are available at  
782 NCBI-SRA under BioProject [PRJNA927306](#). Hi-C and Chicago data is accessible on request.  
783 The list of orthogroups, counts table used for RNA-seq analyses and full GO term enrichment  
784 results, along with all scripts written for this manuscript are available on a github repository at  
785 [https://github.com/cgrootcrego/Tillandsia\\_Genomes](https://github.com/cgrootcrego/Tillandsia_Genomes).

786

## 787 **9. References**

788

789

- 790 1. Miller, A. H. Some ecologic and morphologic considerations in the evolution of higher  
791 taxonomic categories. *Ornithologie als biologische Wissenschaft* **28**, 84–88 (1949).
- 792 2. Hunter, J. P. Key innovations and the ecology of macroevolution. *Trends Ecol. Evol.* **13**,  
793 31–36 (1998).

- 794 3. Winter, K. & Smith, J. A. C. *Crassulacean Acid Metabolism: Biochemistry, Ecophysiology*  
795 *and Evolution*. (Springer, 2012).
- 796 4. Borland, A. M. *et al.* Engineering crassulacean acid metabolism to improve water-use  
797 efficiency. *Trends Plant Sci.* **19**, 327–338 (2014).
- 798 5. Silvera, K. *et al.* Evolution along the crassulacean acid metabolism continuum. *Funct. Plant*  
799 *Biol.* **37**, 995–1010 (2010).
- 800 6. Cicconardi, F. *et al.* Chromosome Fusion Affects Genetic Diversity and Evolutionary  
801 Turnover of Functional Loci but Consistently Depends on Chromosome Size. *Mol. Biol.*  
802 *Evol.* **38**, 4449–4462 (2021).
- 803 7. McGee, M. D. *et al.* The ecological and genomic basis of explosive adaptive radiation.  
804 *Nature* **586**, 75–79 (2020).
- 805 8. Brawand, D. *et al.* The genomic substrate for adaptive radiation in African cichlid fish.  
806 *Nature* **513**, 375–381 (2015).
- 807 9. Baduel, P., Quadrana, L., Hunter, B., Bomblies, K. & Colot, V. Relaxed purifying selection  
808 in autopolyploids drives transposable element over-accumulation which provides variants  
809 for local adaptation. *Nat. Commun.* **10**, 5818 (2019).
- 810 10. Weissensteiner, M. H. *et al.* Discovery and population genomics of structural variation in a  
811 songbird genus. *Nat. Commun.* **11**, 3403 (2020).
- 812 11. Luo, J., Sun, X., Cormack, B. P. & Boeke, J. D. Karyotype engineering by chromosome  
813 fusion leads to reproductive isolation in yeast. *Nature* **560**, 392–396 (2018).
- 814 12. Lowry, D. B. & Willis, J. H. A widespread chromosomal inversion polymorphism  
815 contributes to a major life-history transition, local adaptation, and reproductive isolation.  
816 *PLoS Biol.* **8**, (2010).

- 817 13. Ricci, M., Peona, V., Guichard, E., Taccioli, C. & Boattini, A. Transposable Elements  
818 Activity is Positively Related to Rate of Speciation in Mammals. *J. Mol. Evol.* **86**, 303–310  
819 (2018).
- 820 14. Davey, J. W. *et al.* Major Improvements to the *Heliconius melpomene* Genome Assembly  
821 Used to Confirm 10 Chromosome Fusion Events in 6 Million Years of Butterfly Evolution.  
822 *G3* **6**, 695–708 (2016).
- 823 15. Katju, V. & Bergthorsson, U. Copy-number changes in evolution: rates, fitness effects and  
824 adaptive significance. *Front. Genet.* **4**, 273 (2013).
- 825 16. Arnegard, M. E., Zwickl, D. J., Lu, Y. & Zakon, H. H. Old gene duplication facilitates  
826 origin and diversification of an innovative communication system—twice. *Proceedings of*  
827 *the National Academy of Sciences* **107**, 22172–22177 (2010).
- 828 17. Moriyama, Y. *et al.* Evolution of the fish heart by sub/neofunctionalization of an elastin  
829 gene. *Nat. Commun.* **7**, 10397 (2016).
- 830 18. Mondragón-Palomino, M. & Theissen, G. Why are orchid flowers so diverse? Reduction of  
831 evolutionary constraints by paralogues of class B floral homeotic genes. *Ann. Bot.* **104**, 583–  
832 594 (2009).
- 833 19. Givnish, T. J. *et al.* Adaptive radiation, correlated and contingent evolution, and net species  
834 diversification in Bromeliaceae. *Mol. Phylogenet. Evol.* **71**, 55–78 (2014).
- 835 20. Barfuss, M. H. J. *et al.* Taxonomic revision of bromeliaceae subfam. Tillandsioideae based  
836 on a multi-locus DNA sequence phylogeny and morphology. *Phytotaxa* **279**, 1–97 (2016).
- 837 21. Gitaí, J., Paule, J., Zizka, G., Schulte, K. & Benko-Iseppon, A. M. Chromosome numbers  
838 and DNA content in Bromeliaceae: Additional data and critical review. *Bot. J. Linn. Soc.*  
839 **176**, 349–368 (2014).

- 840 22. De La Harpe, M. *et al.* Genomic footprints of repeated evolution of CAM photosynthesis in  
841 a Neotropical species radiation. *Plant Cell Environ.* **43**, 2987–3001 (2020).
- 842 23. Benzing, D. H. & Bennett, B. *Bromeliaceae: Profile of an Adaptive Radiation.* (Cambridge  
843 University Press, 2000).
- 844 24. Crayn, D. M., Winter, K., Schulte, K. & Smith, J. A. C. Photosynthetic pathways in  
845 Bromeliaceae: Phylogenetic and ecological significance of CAM and C3 based on carbon  
846 isotope ratios for 1893 species. *Bot. J. Linn. Soc.* **178**, 169–221 (2015).
- 847 25. Ou, S. *et al.* Benchmarking transposable element annotation methods for creation of a  
848 streamlined, comprehensive pipeline. *Genome Biol.* **20**, 275 (2019).
- 849 26. Cresse, A. D., Hulbert, S. H., Brown, W. E., Lucas, J. R. & Bennetzen, J. L. Mu1-related  
850 transposable elements of maize preferentially insert into low copy number DNA. *Genetics*  
851 **140**, 315–324 (1995).
- 852 27. Brown, G. K. & Gilmartin, A. J. Chromosome Numbers in Bromeliaceae. *Am. J. Bot.* **76**,  
853 657–665 (1989).
- 854 28. Ming, R. *et al.* The pineapple genome and the evolution of CAM photosynthesis. *Nat.*  
855 *Genet.* **47**, 1435–1442 (2015).
- 856 29. Emms, D. M. & Kelly, S. OrthoFinder: Phylogenetic orthology inference for comparative  
857 genomics. *Genome Biol.* **20**, 238 (2019).
- 858 30. Lovell, J. T. *et al.* GENESPACE tracks regions of interest and gene copy number variation  
859 across multiple genomes. *Elife* **11**, e78526 (2022).
- 860 31. Araújo, W. L. *et al.* Antisense inhibition of the iron-sulphur subunit of succinate  
861 dehydrogenase enhances photosynthesis and growth in tomato via an organic acid-mediated  
862 effect on stomatal aperture. *Plant Cell* **23**, 600–627 (2011).



- 863 32. Liu, L. *et al.* XAP5 CIRCADIAN TIMEKEEPER specifically modulates 3' splice site  
864 recognition and is important for circadian clock regulation partly by alternative splicing of  
865 LHY and TIC. *Plant Physiol. Biochem.* **172**, 151–157 (2022).
- 866 33. Hayashi, S. *et al.* The glycerophosphoryl diester phosphodiesterase-like proteins SHV3 and  
867 its homologs play important roles in cell wall organization. *Plant Cell Physiol.* **49**, 1522–  
868 1535 (2008).
- 869 34. Weiland, M., Mancuso, S. & Baluska, F. Signalling via glutamate and GLRs in *Arabidopsis*  
870 *thaliana*. *Funct. Plant Biol.* **43**, 1–25 (2015).
- 871 35. Kong, D. *et al.* L-Met Activates *Arabidopsis* GLR Ca<sup>2+</sup> Channels Upstream of ROS  
872 Production and Regulates Stomatal Movement. *Cell Rep.* **17**, 2553–2561 (2016).
- 873 36. Philippe, F., Verdu, I., Morère-Le Paven, M.-C., Limami, A. M. & Planchet, E. Involvement  
874 of *Medicago truncatula* glutamate receptor-like channels in nitric oxide production under  
875 short-term water deficit stress. *J. Plant Physiol.* **236**, 1–6 (2019).
- 876 37. Heyduk, K. *et al.* Shared expression of crassulacean acid metabolism (CAM) genes pre-  
877 dates the origin of CAM in the genus *Yucca*. *J. Exp. Bot.* **70**, 6597–6609 (2019).
- 878 38. Tay, I. Y. Y., Odang, K. B. & Cheung, C. Y. M. Metabolic Modeling of the C3-CAM  
879 Continuum Revealed the Establishment of a Starch/Sugar-Malate Cycle in CAM Evolution.  
880 *Front. Plant Sci.* **11**, 2221 (2021).
- 881 39. Deng, H. *et al.* Evolutionary history of PEPC genes in green plants: Implications for the  
882 evolution of CAM in orchids. *Mol. Phylogenet. Evol.* **94**, 559–564 (2016).
- 883 40. Zhu, F. & Ming, R. Global identification and expression analysis of pineapple aquaporins  
884 revealed their roles in CAM photosynthesis, boron uptake and fruit domestication.  
885 *Euphytica* **215**, 132 (2019).

- 886 41. Simpson, G. G. *The Major Features of Evolution*. (Columbia University Press, 1953).
- 887 42. Wickell, D. *et al.* Underwater CAM photosynthesis elucidated by Isoetes genome. *Nature*  
888 *Communications* 2021 12:1 **12**, 1–13 (2021).
- 889 43. Heyduk, K., McAssey, E. V. & Leebens-Mack, J. Differential timing of gene expression and  
890 recruitment in independent origins of CAM in the Agavoideae (Asparagaceae). *New Phytol.*  
891 **235**, 2111–2126 (2022).
- 892 44. Cai, J. *et al.* The genome sequence of the orchid *Phalaenopsis equestris*. *Nat. Genet.* **47**, 65–  
893 72 (2015).
- 894 45. Silvera, K., Winter, K., Rodriguez, B. L., Albion, R. L. & Cushman, J. C. Multiple isoforms  
895 of phosphoenolpyruvate carboxylase in the Orchidaceae (subtribe Oncidiinae): implications  
896 for the evolution of crassulacean acid metabolism. *J. Exp. Bot.* **65**, 3623–3636 (2014).
- 897 46. Ohno, S. *Evolution by gene duplication*. (Springer Berlin, 1970).
- 898 47. Pedro, D. L. F. *et al.* An Atlas of Plant Transposable Elements. *F1000Res.* **10**, 1194 (2021).
- 899 48. Yardeni, G. *et al.* Taxon-specific or universal? Using target capture to study the  
900 evolutionary history of rapid radiations. *Mol. Ecol. Resour.* (2021) doi:10.1111/1755-  
901 0998.13523.
- 902 49. Liu, L. *et al.* Draft genome of *Puya raimondii* (Bromeliaceae), the Queen of the Andes.  
903 *Genomics* **113**, 2537–2546 (2021).
- 904 50. de Vos, J. M., Augustijnen, H., Bätischer, L. & Lucek, K. Speciation through chromosomal  
905 fusion and fission in Lepidoptera. *Philos. Trans. R. Soc. Lond. B Biol. Sci.* **375**, 20190539  
906 (2020).
- 907 51. Faria, R. & Navarro, A. Chromosomal speciation revisited: rearranging theory with pieces  
908 of evidence. *Trends Ecol. Evol.* **25**, 660–669 (2010).

- 909 52. Mérot, C., Oomen, R. A., Tigano, A. & Wellenreuther, M. A Roadmap for Understanding  
910 the Evolutionary Significance of Structural Genomic Variation. *Trends Ecol. Evol.* **35**, 561–  
911 572 (2020).
- 912 53. Galbraith, D. W. *et al.* Rapid flow cytometric analysis of the cell cycle in intact plant  
913 tissues. *Science* **220**, 1049–1051 (1983).
- 914 54. Temsch, E. M. Genome size in liverworts. *Preslia* **82**, 63–80 (2010).
- 915 55. Temsch, E. M., Koutecký, P., Urfus, T., Šmarda, P. & Doležel, J. Reference standards for  
916 flow cytometric estimation of absolute nuclear DNA content in plants. *Cytometry A* **101**,  
917 710–724 (2022).
- 918 56. Otto, F. J., Oldiges, H., Göhde, W. & Jain, V. K. Flow cytometric measurement of nuclear  
919 DNA content variations as a potential in vivo mutagenicity test. *Cytometry* **2**, 189–191  
920 (1981).
- 921 57. Jang, T.-S. & Weiss-Schneeweiss, H. Formamide-Free Genomic in situ Hybridization  
922 Allows Unambiguous Discrimination of Highly Similar Parental Genomes in Diploid  
923 Hybrids and Allopolyploids. *Cytogenet. Genome Res.* **146**, 325–331 (2015).
- 924 58. Putnam, N. H. *et al.* Chromosome-scale shotgun assembly using an in vitro method for long-  
925 range linkage. *Genome Res.* **26**, 342–350 (2016).
- 926 59. Lieberman-Aiden, E. *et al.* Comprehensive mapping of long-range interactions reveals  
927 folding principles of the human genome. *Science* **326**, 289–293 (2009).
- 928 60. Schubert, M., Lindgreen, S. & Orlando, L. AdapterRemoval v2: rapid adapter trimming,  
929 identification, and read merging. *BMC Res. Notes* **9**, 88 (2016).
- 930 61. Koren, S. *et al.* Canu: scalable and accurate long-read assembly via adaptive k-mer  
931 weighting and repeat separation. *Genome Res.* **27**, 722–736 (2017).

- 932 62. Roach, M. J., Schmidt, S. A. & Borneman, A. R. Purge Haplotigs: allelic contig  
933 reassignment for third-gen diploid genome assemblies. *BMC Bioinformatics* **19**, 460 (2018).
- 934 63. Li, H. Minimap2: pairwise alignment for nucleotide sequences. *Bioinformatics* **34**, 3094–  
935 3100 (2018).
- 936 64. Walker, B. J. *et al.* Pilon: an integrated tool for comprehensive microbial variant detection  
937 and genome assembly improvement. *PLoS One* **9**, e112963 (2014).
- 938 65. Li, H. Aligning sequence reads, clone sequences and assembly contigs with BWA-MEM.  
939 *arXiv [q-bio.GN]* (2013).
- 940 66. Waterhouse, R. M. *et al.* BUSCO Applications from Quality Assessments to Gene  
941 Prediction and Phylogenomics. *Mol. Biol. Evol.* **35**, 543–548 (2018).
- 942 67. Smit, A. F. A., Hubley, R. & Green, P. RepeatMasker Open-4.0.  
943 <http://www.repeatmasker.org> (2013-2015).
- 944 68. Grabherr, M. G. *et al.* Full-length transcriptome assembly from RNA-Seq data without a  
945 reference genome. *Nat. Biotechnol.* **29**, 644–652 (2011).
- 946 69. Hoff, K. J., Lomsadze, A., Borodovsky, M. & Stanke, M. Whole-genome annotation with  
947 BRAKER. in *Gene prediction* 65–95 (Humana, 2019).
- 948 70. Campbell, M. S., Holt, C., Moore, B. & Yandell, M. Genome Annotation and Curation  
949 Using MAKER and MAKER-P. *Curr. Protoc. Bioinformatics* **2014**, 4.11.1-4.11.39 (2014).
- 950 71. Stanke, M., Diekhans, M., Baertsch, R. & Haussler, D. Using native and syntenically  
951 mapped cDNA alignments to improve de novo gene finding. *Bioinformatics* **24**, 637–644  
952 (2008).
- 953 72. Chen, L.-Y. *et al.* The bracteatus pineapple genome and domestication of clonally  
954 propagated crops. *Nat. Genet.* **51**, 1549–1558 (2019).

- 955 73. Götz, S. *et al.* High-throughput functional annotation and data mining with the Blast2GO  
956 suite. *Nucleic Acids Res.* **36**, 3420–3435 (2008).
- 957 74. Gu, Z., Gu, L., Eils, R., Schlesner, M. & Brors, B. Circlize implements and enhances  
958 circular visualization in R. *Bioinformatics* **30**, 2811–2812 (2014).
- 959 75. Leroy, T. *et al.* A bird’s white-eye view on avian sex chromosome evolution. *Peer*  
960 *Community Journal* **1**, (2021).
- 961 76. Alexa, A. & Rahnenführer, J. Gene set enrichment analysis with topGO. *Bioconductor*  
962 *Improv* **27**, 1–26 (2009).
- 963 77. Ranwez, V., Douzery, E. J. P., Cambon, C., Chantret, N. & Delsuc, F. MACSE v2: Toolkit  
964 for the Alignment of Coding Sequences Accounting for Frameshifts and Stop Codons. *Mol.*  
965 *Biol. Evol.* **35**, 2582–2584 (2018).
- 966 78. Yang, Z. PAML 4: Phylogenetic Analysis by Maximum Likelihood. *Mol. Biol. Evol.* **24**,  
967 1586–1591 (2007).
- 968 79. *AlignmentProcessor: Prepares CDS fasta Alignments for use with several programs.*  
969 (Github).
- 970 80. Wong, W. S. W., Yang, Z., Goldman, N. & Nielsen, R. Accuracy and power of statistical  
971 methods for detecting adaptive evolution in protein coding sequences and for identifying  
972 positively selected sites. *Genetics* **168**, 1041–1051 (2004).
- 973 81. Babraham Bioinformatics - FastQC A Quality Control tool for High Throughput Sequence  
974 Data. <https://www.bioinformatics.babraham.ac.uk/projects/fastqc/>.
- 975 82. Ewels, P., Magnusson, M., Lundin, S. & Käller, M. MultiQC: summarize analysis results for  
976 multiple tools and samples in a single report. *Bioinformatics* **32**, 3047–3048 (2016).
- 977 83. Dobin, A. *et al.* STAR: Ultrafast universal RNA-seq aligner. *Bioinformatics* **29**, 15–21

978 (2013).

979 84. Liao, Y., Smyth, G. K. & Shi, W. FeatureCounts: An efficient general purpose program for  
980 assigning sequence reads to genomic features. *Bioinformatics* **30**, 923–930 (2014).

981 85. Robinson, M. D., McCarthy, D. J. & Smyth, G. K. edgeR: A Bioconductor package for  
982 differential expression analysis of digital gene expression data. *Bioinformatics* **26**, 139–140  
983 (2009).

984 86. Conesa, A., Nueda, M. J., Ferrer, A. & Talón, M. maSigPro: a method to identify  
985 significantly differential expression profiles in time-course microarray experiments.  
986 *Bioinformatics* **22**, 1096–1102 (2006).

987

a) *Tillandsia fasciculata*  
(CAM)

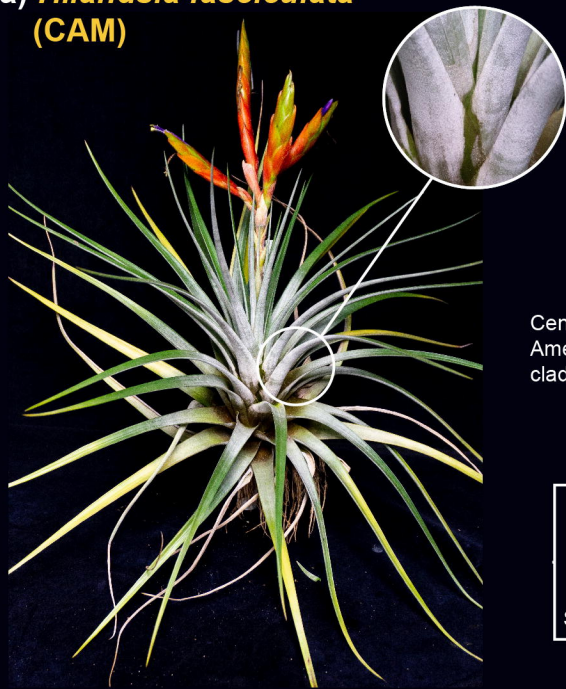

- ★ CAM species
- ★ C3 species
- Ancestrally CAM
- Ancestrally C3
- Ancestrally WHZ

c)

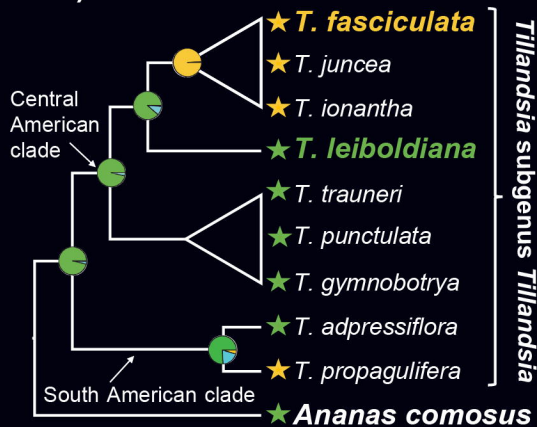

b) *Tillandsia leiboldiana*  
(C3)

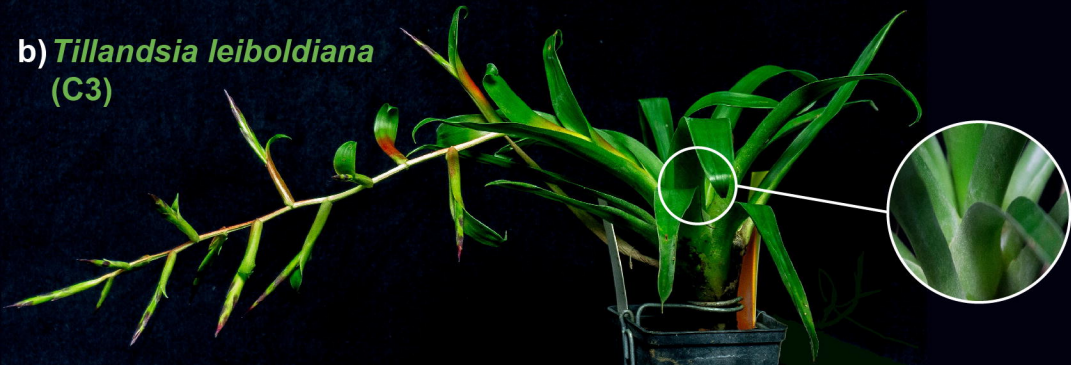

**a**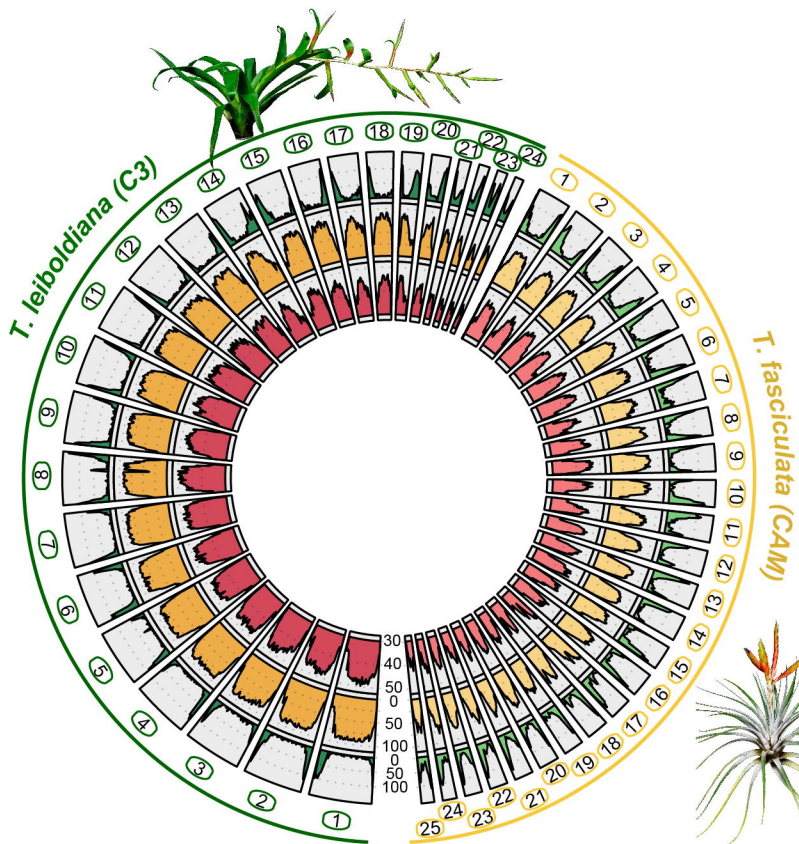**c**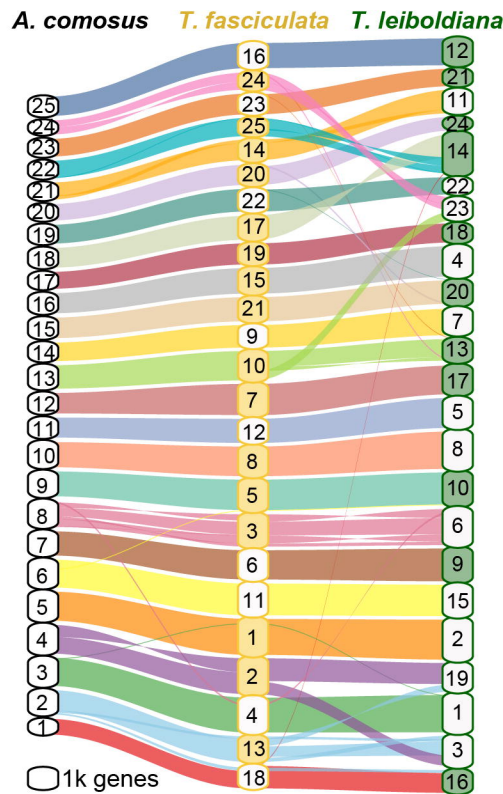**b**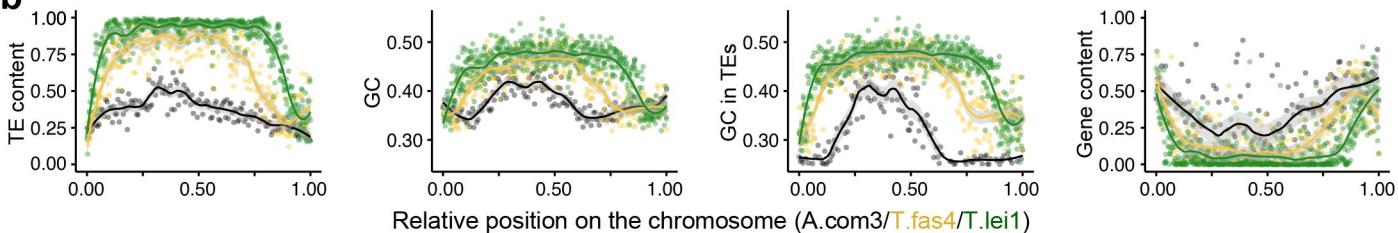



**a**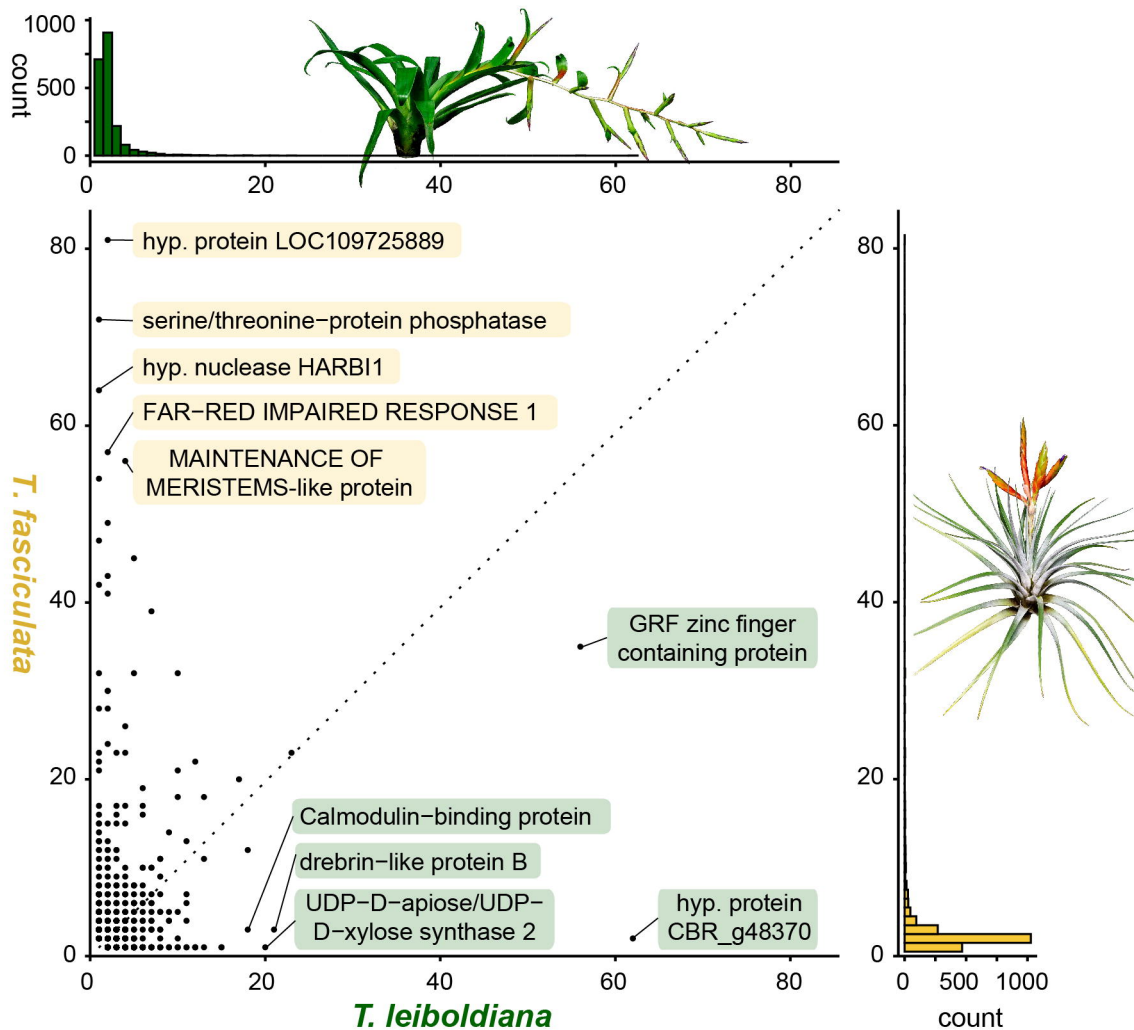**b**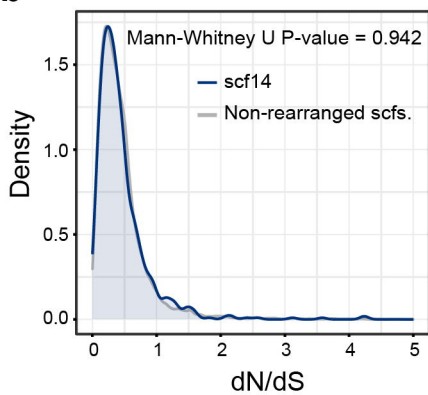**c**

| Orthogroup | dN/dS    | adj-P   | Function                                             |
|------------|----------|---------|------------------------------------------------------|
| OG0002972  | $\infty$ | 0.00162 | jacalin-related lectin 3-like                        |
| OG0005000  | $\infty$ | 0.00628 | cucumber peeling cupredoxin-like                     |
| OG0006253  | $\infty$ | 0.00066 | mitochondrial prohibitin-3                           |
| OG0009278  | $\infty$ | 0.00155 | chloroplatic Peroxiredoxin-2E-2                      |
| OG0012770  | $\infty$ | 0.01374 | metallo-hydrolase/oxidoreductase superfamily protein |
| OG0011786  | 9.3      | 0.00008 | U-box_domain-containing_protein                      |
| OG0015603  | 8.1      | 0.01575 | anaphase-promoting complex subunit CDC27             |
| OG0009004  | 3.1      | 0.01148 | Hydroquinone glycosyltransferase                     |
| OG0008977  | 2.6      | 0.00512 | glutamate receptor 2.8-like                          |
| OG0010014  | 2.0      | 0.00603 | Glycerophosphodiester phosphodiesterase GDPDL7       |

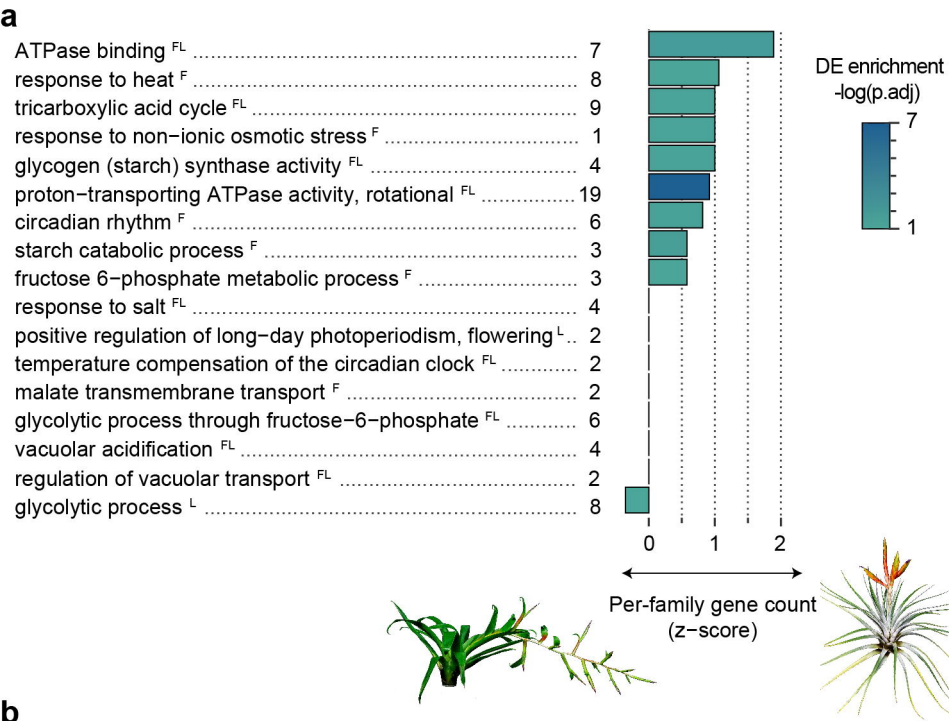

**b**

|                        | Whole genome | DE in <i>T. leiboldiana</i> (C3) | DE in <i>T. fasciculata</i> (CAM) |
|------------------------|--------------|----------------------------------|-----------------------------------|
| Total orthogroup count | 18697        | 714                              | 738                               |
| % of 1:1 OGs           | 0.75         | 0.69*                            | 0.66*                             |
| % of F:L OGs (F > L)   | 0.05         | 0.07*                            | 0.16***                           |
| % of F:L OGs (F < L)   | 0.03         | 0.06**                           | 0.02                              |
| % of F:L OGs (F = L)   | 0.03         | 0.08**                           | 0.07**                            |
| % of F:0 OGs           | 0.06         | 0.00                             | 0.06                              |
| % of 0:L OGs           | 0.07         | 0.08                             | 0.00                              |

**c**

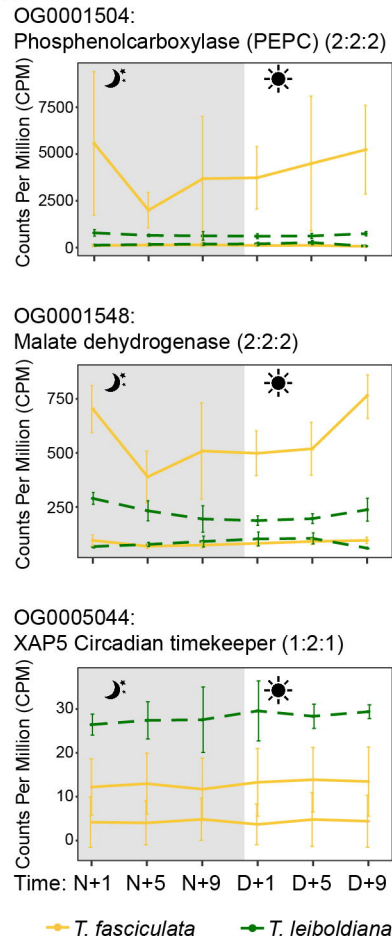

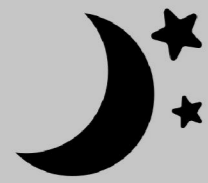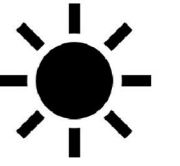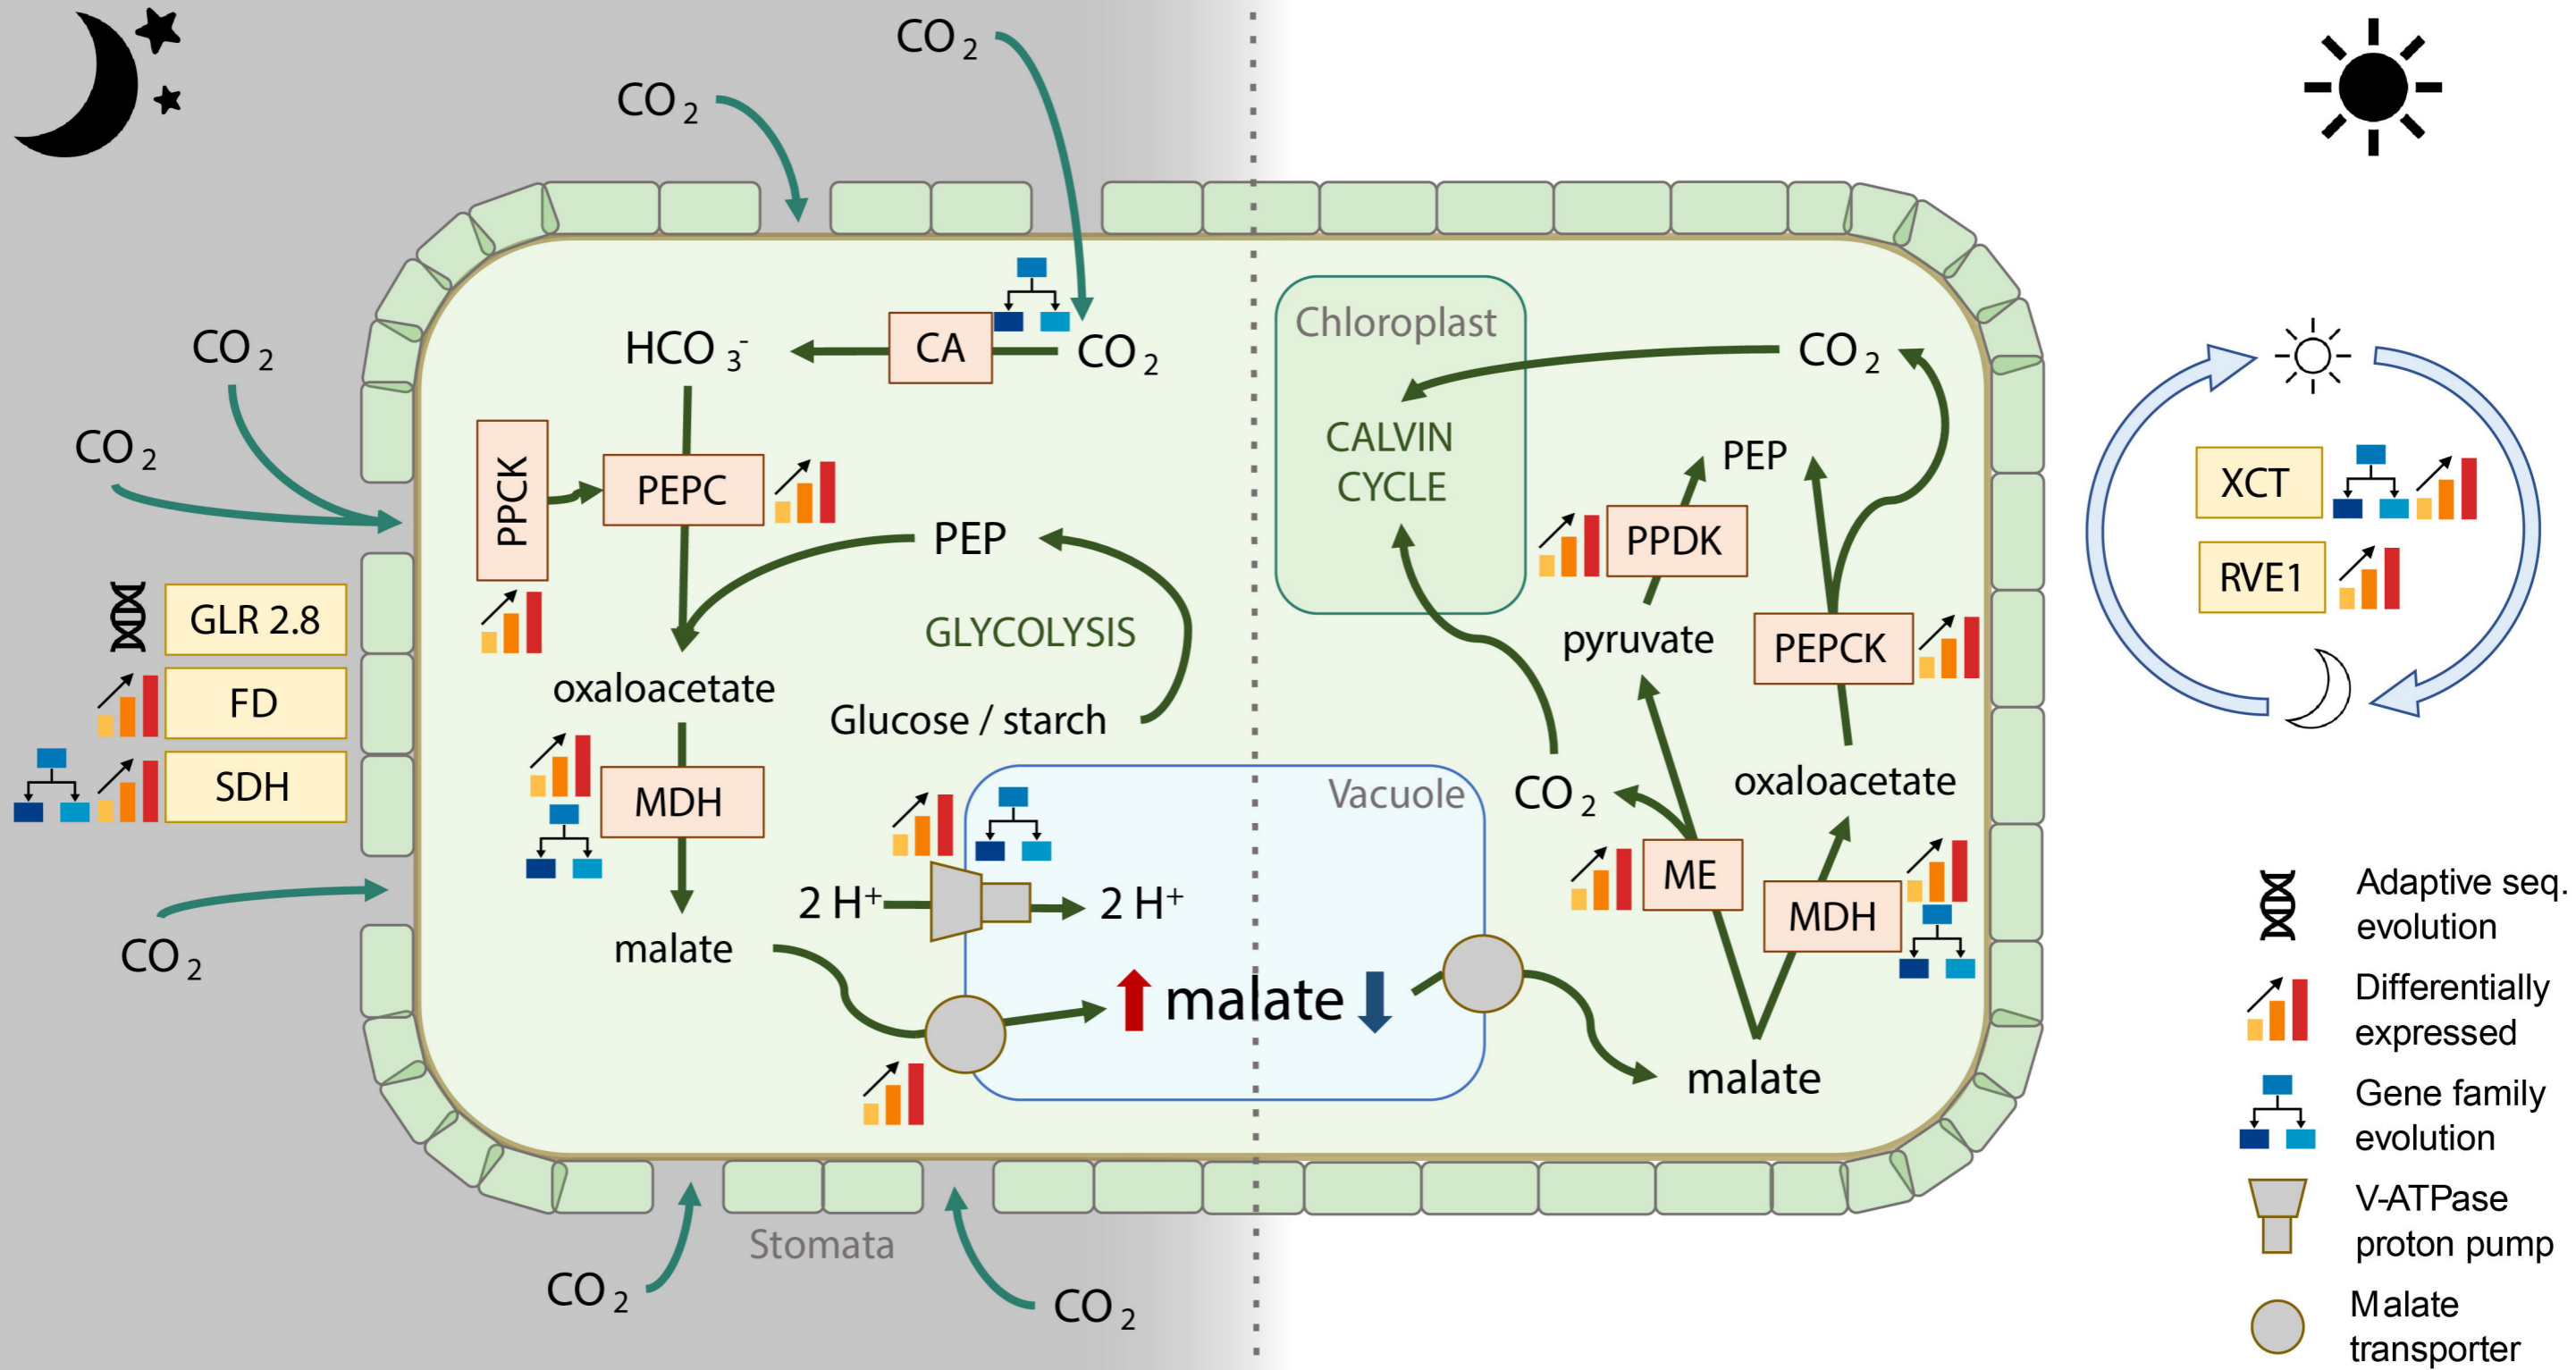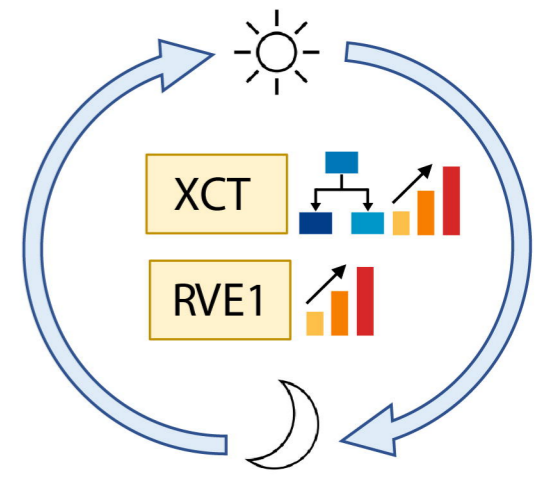

Source: https://www.biorxiv.org/content/10.1101/2023.02.01.526631v1.full.pdf
