# Supplementary material for: CAM evolution is associated with gene family expansion in an explosive bromeliad radiation
Source: bioRxiv or medRxiv preprint supplement (doi:10.1101/2023.02.01.526631), 2024-03-04
Supplement: Supplementary file [file media-1.pdf]

1 *Supplementary Information*

2  
3 “Short structural variation fuelled CAM evolution within an explosive bromeliad  
4 radiation”  
5  
6

7 Groot Crego, C.; Hess, J.; Yardeni, G.; de La Harpe, M.; Beclin, F.; Cauz-Santos, L.A.; Saadain,  
8 S.; Barbará, T.; Temsch, EM; Weiss-Scheeweiss, H.; Barfuss, M.H.J.; Till, W.; Lexer, C.; Paun,  
9 O.; Leroy, T.  
10

11 **1. SUPPLEMENTARY FIGURES..... 2**

12 **2. SUPPLEMENTARY TABLES.....14**

13 **3. SUPPLEMENTARY NOTES.....21**

14 **NOTE 1: GENOME SIZE AND KARYOTYPE OF *T. FASCICULATA* AND *T. LEIBOLDIANA* .....21**

15 **NOTE 2: PRE-ASSEMBLY ESTIMATION OF PER-ACCESSION HETEROZYGOSITY .....21**

16 **NOTE 3: IDENTIFYING MAIN SCAFFOLDS IN DE NOVO ASSEMBLY .....22**

17 **NOTE 4: ON THE SUCCESS OF *DE NOVO* ASSEMBLY OF HIGHLY REPETITIVE GENOMES.....23**

18 **NOTE 5: ON THE SPATIAL DISTRIBUTION OF GC AND TE CONTENT IN BROMELIAD GENOMES.....24**

19 **NOTE 6: IDENTIFYING LARGE-SCALE REARRANGEMENTS BETWEEN *T. FASCICULATA* AND *T. LEIBOLDIANA* .....25**

20 **NOTE 7: CORRECTING MULTI-COPY GENE FAMILY SIZES .....26**

21 **NOTE 8: SELECTING RAPIDLY EVOLVING GENE FAMILIES .....27**

22 **NOTE 9: DETAILED DESCRIPTION OF CANDIDATE GENES FOR POSITIVE SELECTION.....28**

23 **NOTE 10: DIFFERENTIAL GENE EXPRESSION USING THE *T. LEIBOLDIANA* ASSEMBLY .....29**

24 **NOTE 11: DISTRIBUTION OF DE GENES ACROSS THE GENOME .....30**

25 **NOTE 12: LIMITATIONS OF THIS STUDY AND FUTURE DIRECTIONS.....30**

26 **4. REFERENCES.....31**

27

28

29

30 **1. Supplementary Figures**

31

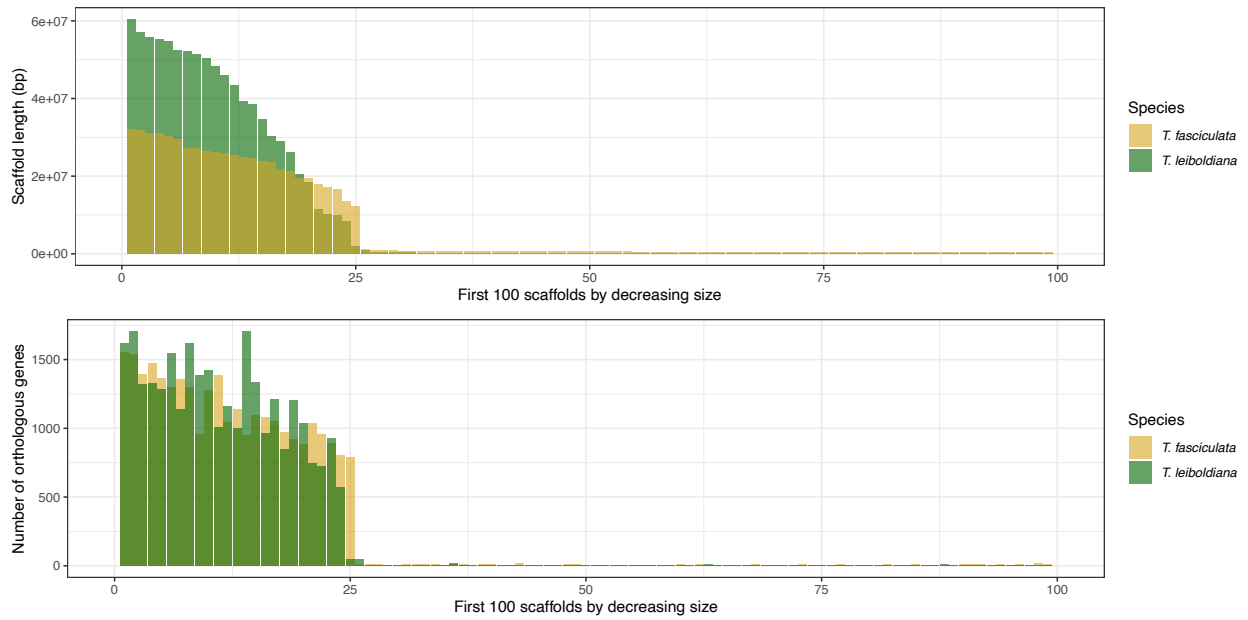

32

33 *Figure S1: Distribution of scaffold sizes (top) and count of orthologous genes per scaffold (bottom) for*  
34 *the top 100 largest scaffolds of both assemblies.*

35

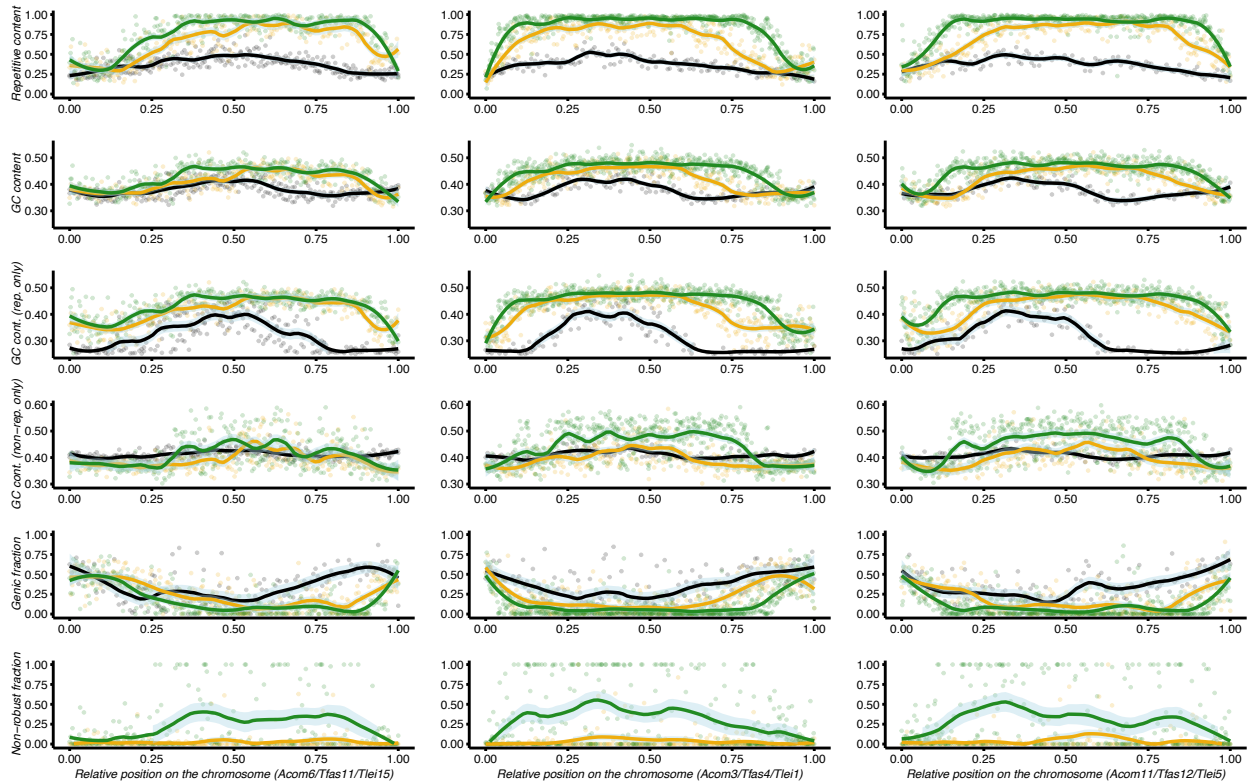

36

37 *Figure S2: TE, GC and gene content at three examples of syntenic chromosome triplets of A. comosus*  
 38 *(black), T. fasciculata (yellow) and T. leiboldiana (green). Each column represents a separate*  
 39 *chromosome triplet. Each dot corresponds to an estimate in a non-overlapping 100 kb window. The line*  
 40 *corresponds to the local regression (loess). Row-wise, from top to bottom, the plots show: (1) per-window*  
 41 *proportion of soft-masked position in the assemblies (repetitive content), (2) GC content at all non-N*  
 42 *positions (soft-masked or not), (3) GC content at soft-masked positions only, (4) GC content at non-*  
 43 *softmasked positions only, (5) per-window proportion of bases falling in genes (genic fraction) and (6)*  
 44 *the proportion of the genic fraction corresponding to non-robust genes (i.e. 1 minus this fraction*  
 45 *corresponds to “robust” gene regions). This latter information is only provided for our two reference*  
 46 *assemblies.*

**a*****T.lei* scaffold 14 (38,474,115 bp)**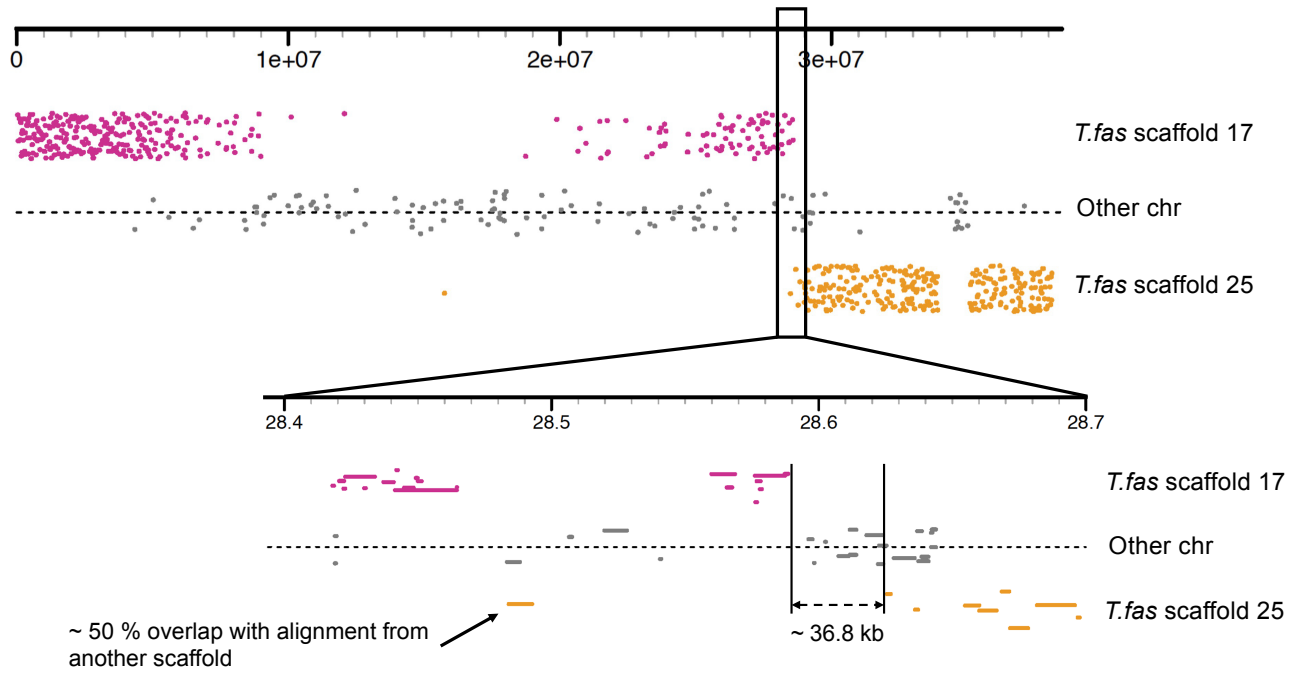**b*****T.fas* scaffold 2 (31,698,969 bp)**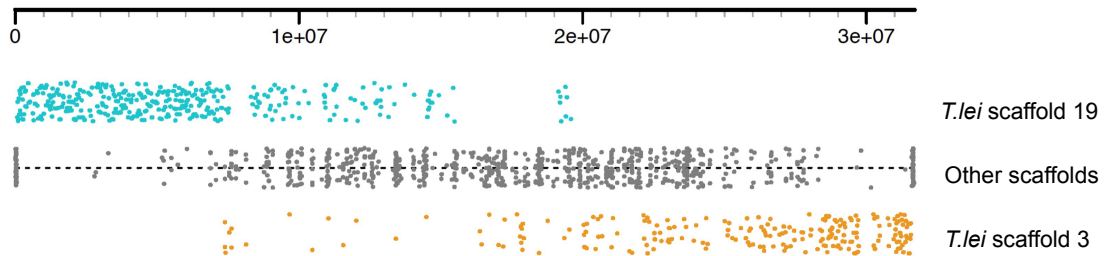***T.fas* scaffold 13 (24,881,768 bp)**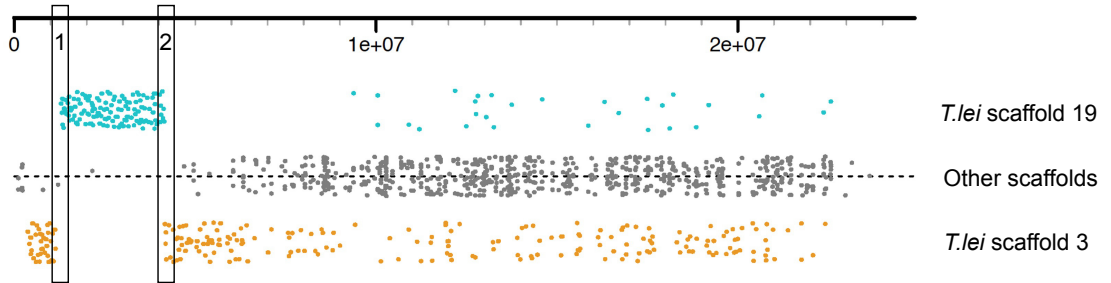

C

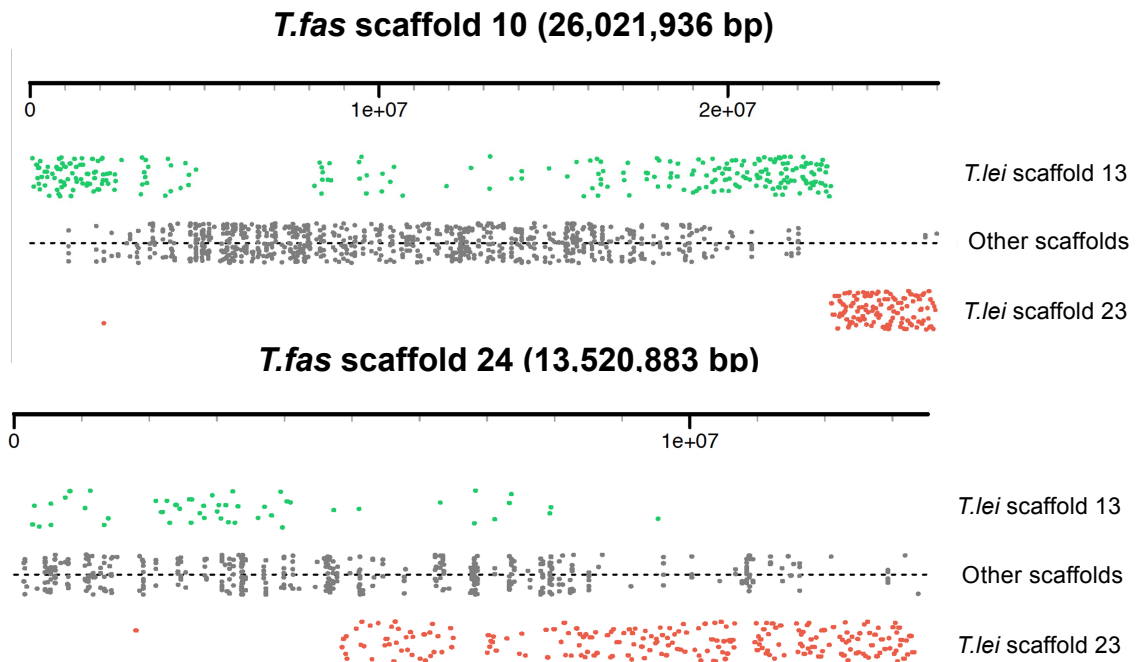

49 *Figure S3: In-depth visualisation of large-scale rearrangements between T. fasciculata and T. leiboldiana*  
 50 *based on local alignments with less than a 90 % overlap with any other alignment. a) Potential fusion of*  
 51 *scaffold 14 in T. leiboldiana, with enlargement of the breakpoint area. B) Translocation 1 – alignments*  
 52 *were too sparse to determine a breakpoint on scaffold 2. Breakpoint 1 on scaffold 13 in T.fasciculata was*  
 53 *not supported by raw PacBio alignments, however breakpoint 2 was. C) Translocation 2 – we find*  
 54 *PacBio alignment support for the breakpoint on scaffold 10, but alignments were too sparse on scaffold*  
 55 *24 to determine a breakpoint. For more in-depth analysis and visualization of PacBio alignments, see the*  
 56 *document 'Tfas\_Tlei\_rearrangements.pdf' on our github repository.*  
 57

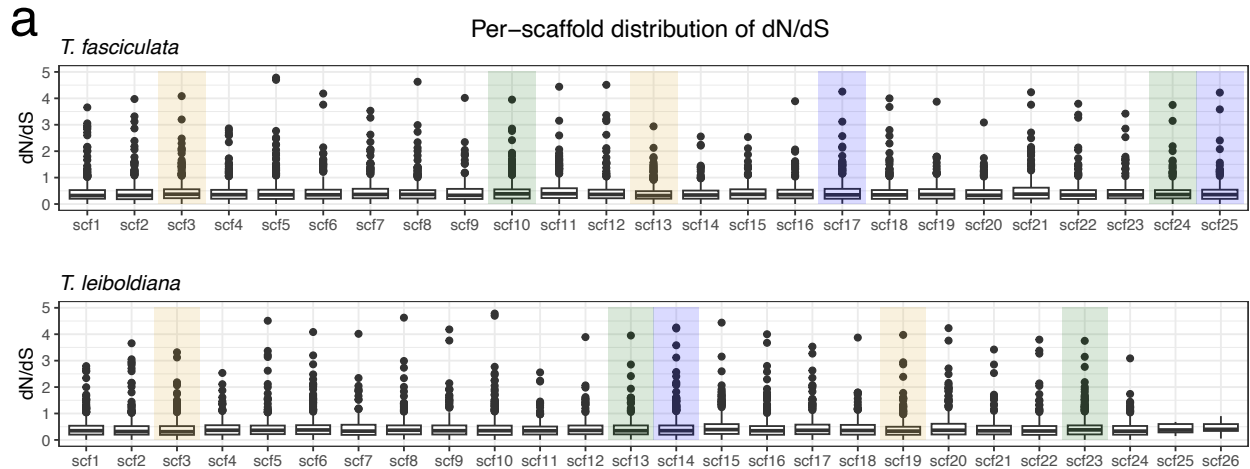

58

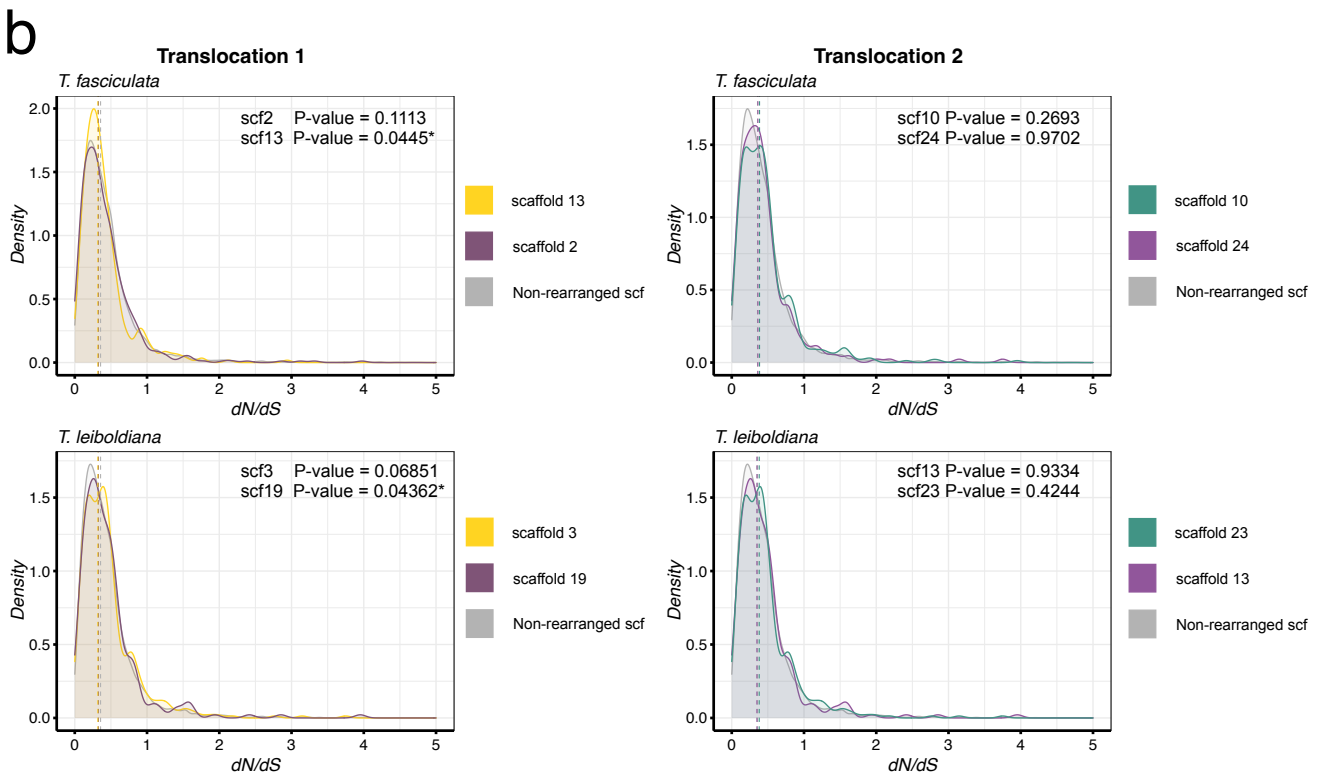

59

60 Figure S4: Genome-wide distribution of  $d_N/d_S$  values between single-copy orthologous genes. A) Boxplot  
 61 of  $d_N/d_S$  values in each scaffold of both assemblies. For ease of reading, the y-axis is cut-off at a  $d_N/d_S$   
 62 value of five. Therefore, candidate genes with high values are not shown here. Scaffolds highlighted in  
 63 colors are involved in the three reported large-scale rearrangements: (1) chromosomal fusion in *T.*  
 64 *leiboldiana* (blue), (2) translocation 1 (yellow), and (3) translocation 2 (green) B) Distribution of  $d_N/d_S$   
 65 values of all non-rearranged chromosomes versus chromosomes involved in translocations. P-values  
 66 were obtained through the Mann Whitney U test.

67

OG00013607: PEPC-kinase

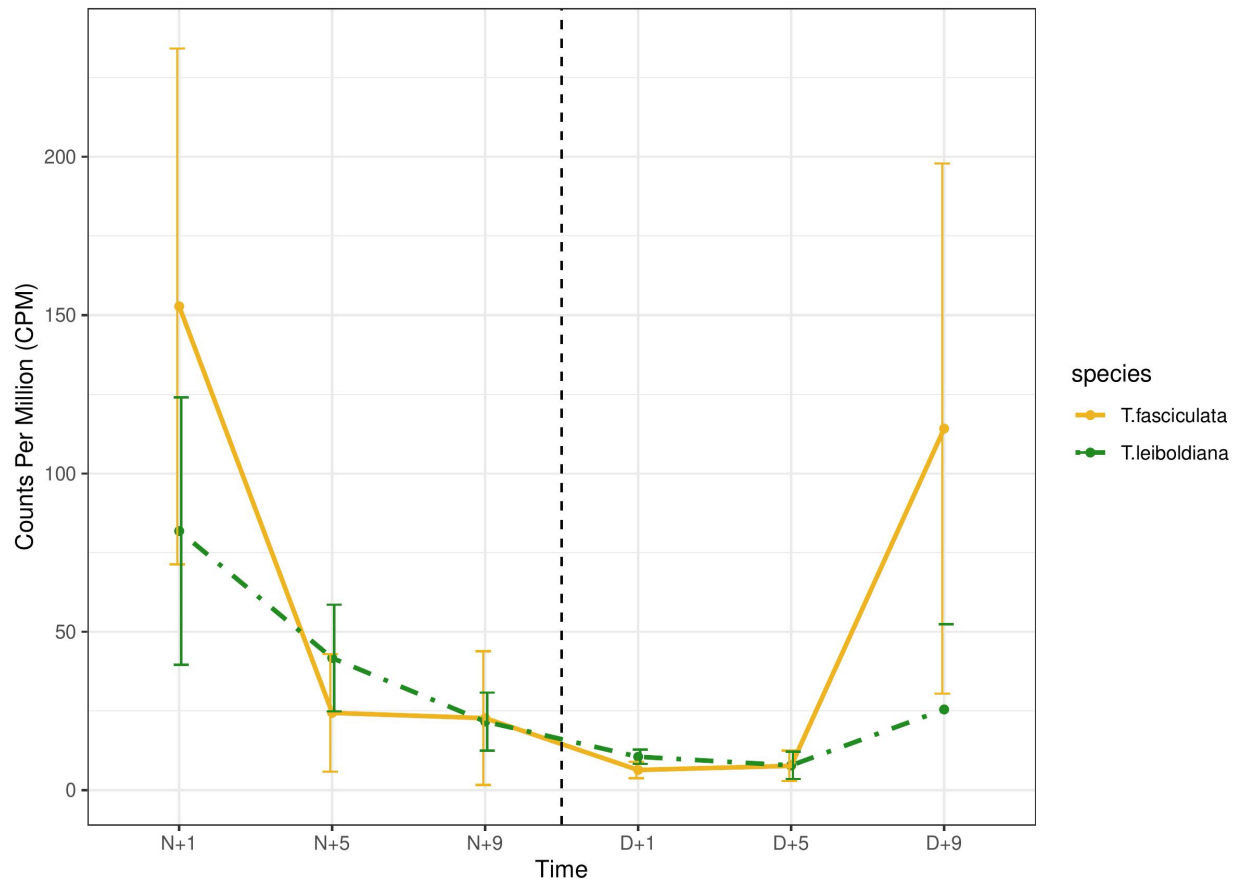

68

69 *Figure S5: Average expression curve of PEPC kinase in T. fasciculata and T. leiboldiana with standard*  
70 *deviation. The dashed vertical line marks the point where the light was switched on. Time is indicated in*  
71 *hours after the lights go off (N=Night) and after they go on (D=Day).*

72

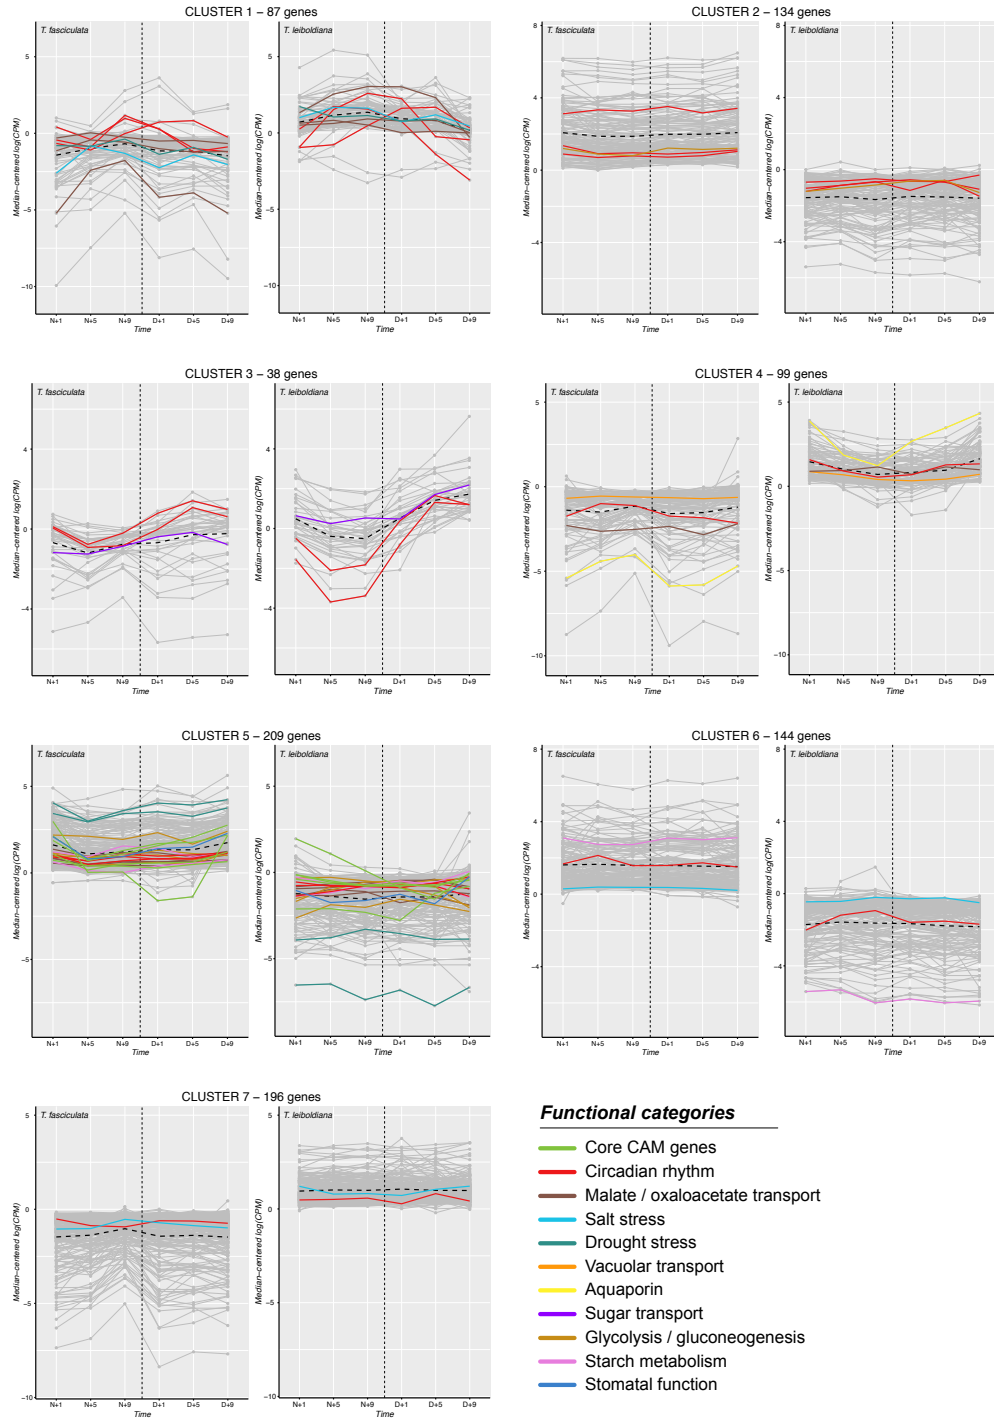

73

74 *Figure S6: Per-gene expression curves of all differentially expressed genes, spread over 7 co-expression*  
 75 *clusters inferred with MaSigPro (and T. fasciculata as reference genome). The dashed vertical line marks*  
 76 *the point where the light was switched on. Time is indicated in hours after the lights go off (N=Night) and*  
 77 *after they go on (D=Day). Highlighted expression curves represent candidate genes underlying CAM-*  
 78 *related functions. The colors correspond to specific subfunctions, laid out in the legend below.*



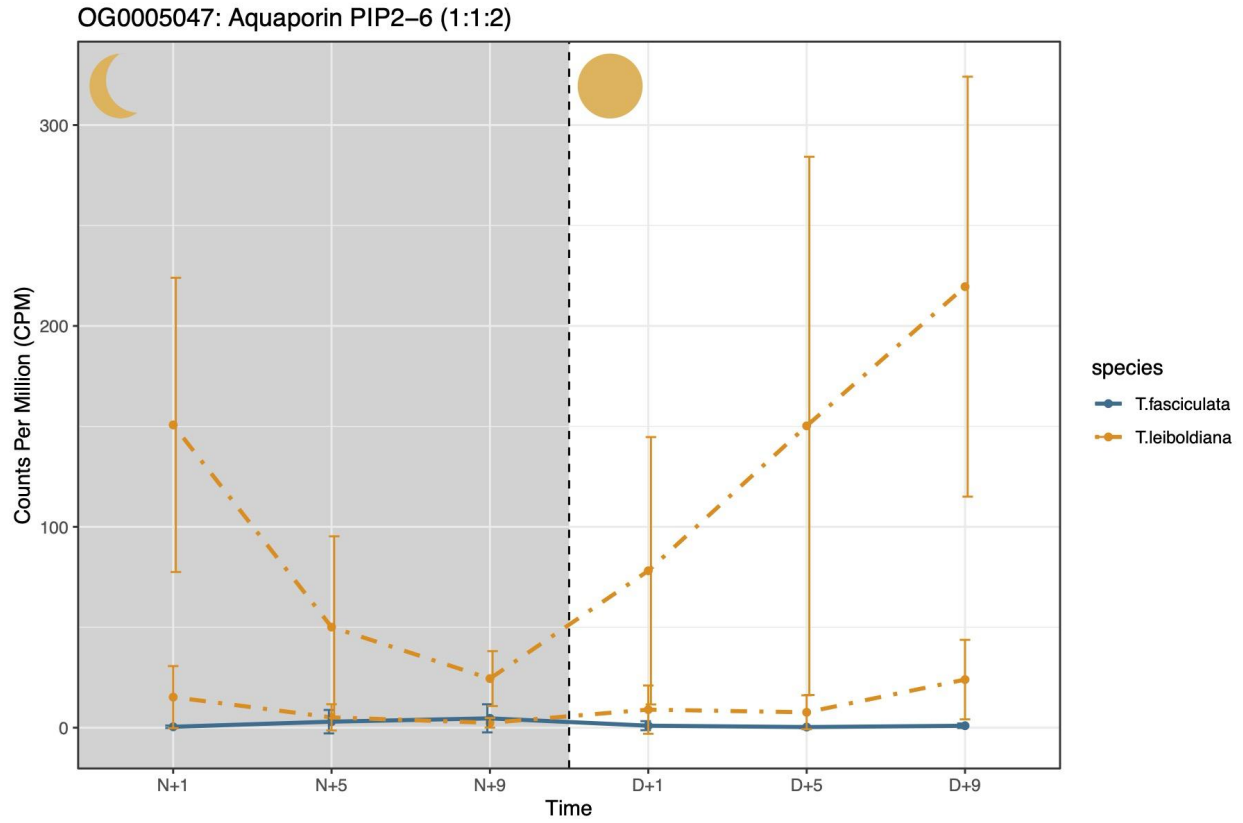

80

81 *Figure S7: Average expression curve of Aquaporin PIP2-6 in T. fasciculata and T. leiboldiana with*  
 82 *standard deviation. The dashed vertical line marks the point where the light was switched on. Time is*  
 83 *indicated in hours after the lights go off (N=Night) and after they go on (D=Day).*

84

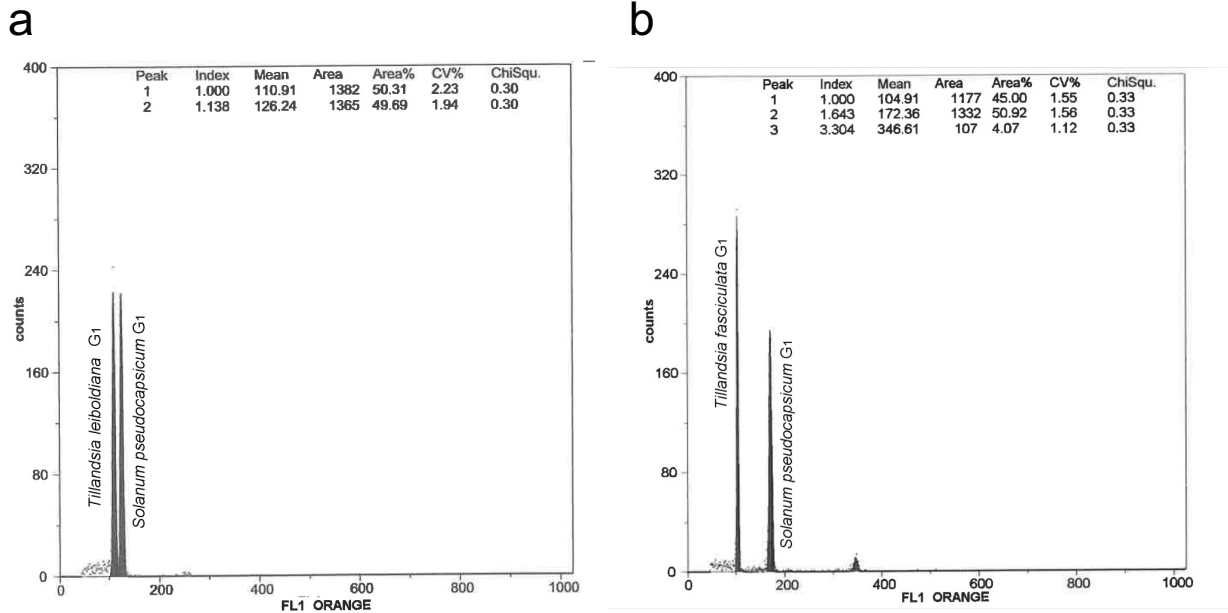

85  
 86 *Figure S8: Genome size measurement histograms of each one exemplary run of Tillandsia fasciculata and*  
 87 *T. leiboldiana showing the mean G<sub>1</sub> nuclei peak positions on the x-axis (fluorescence intensity) of the*  
 88 *samples and the standard organism (Solanum pseudocapsicum, 1.295pg/1C).*  
 89

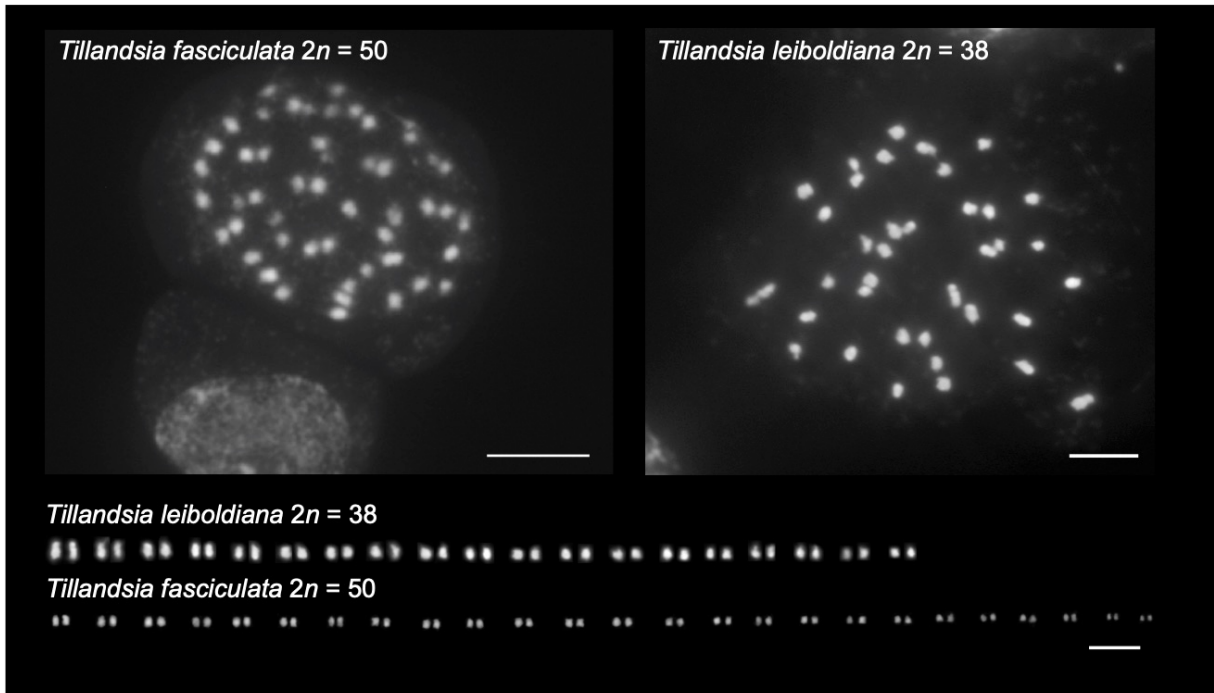

90  
 91 *Figure S9: Mitotic metaphase chromosomes and karyotypes of Tillandsia fasciculata and Tillandsia*  
 92 *leiboldiana. Scale bar, 5µm.*

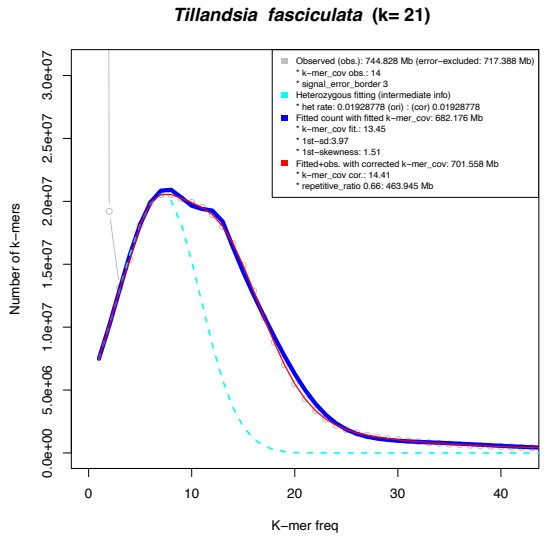

Genome size estimation by error-excluding, fitting, and correcting

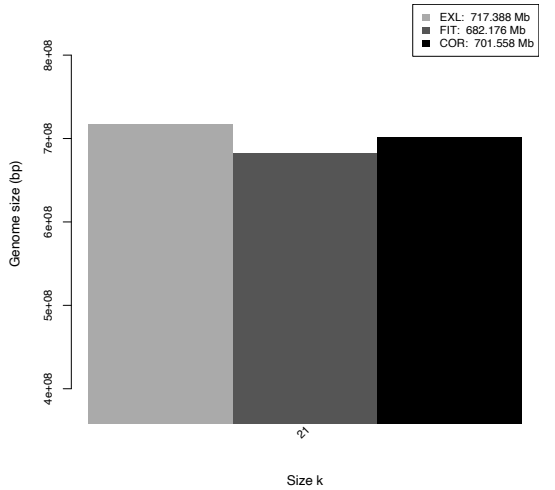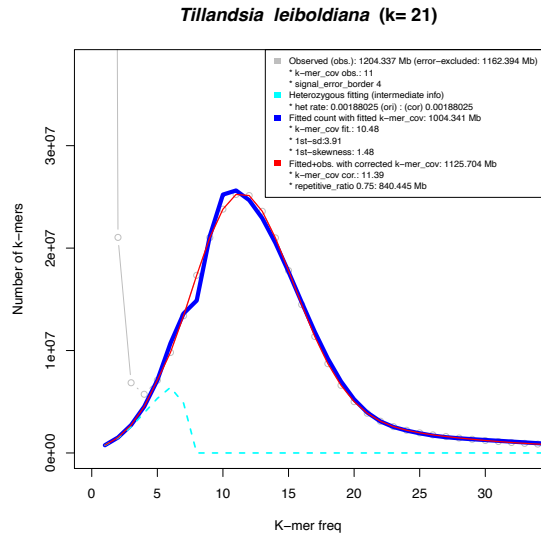

Genome size estimation by error-excluding, fitting, and correcting

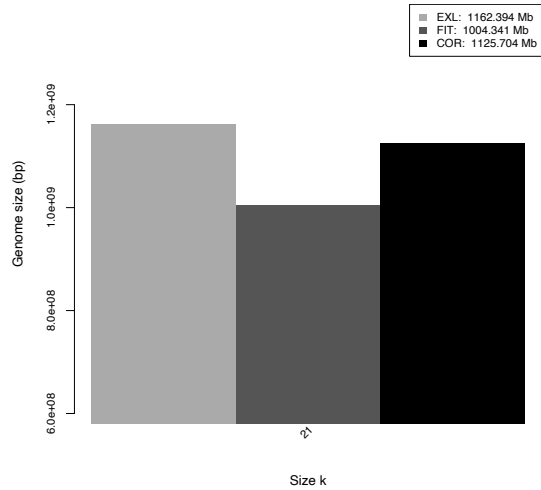

94

95 *Figure S10: Heterozygosity and genome size estimation with a k-mer based approach implemented in*  
 96 *findGSE for Tillandsia fasciculata (left) and T. leiboldiana (right).*

97

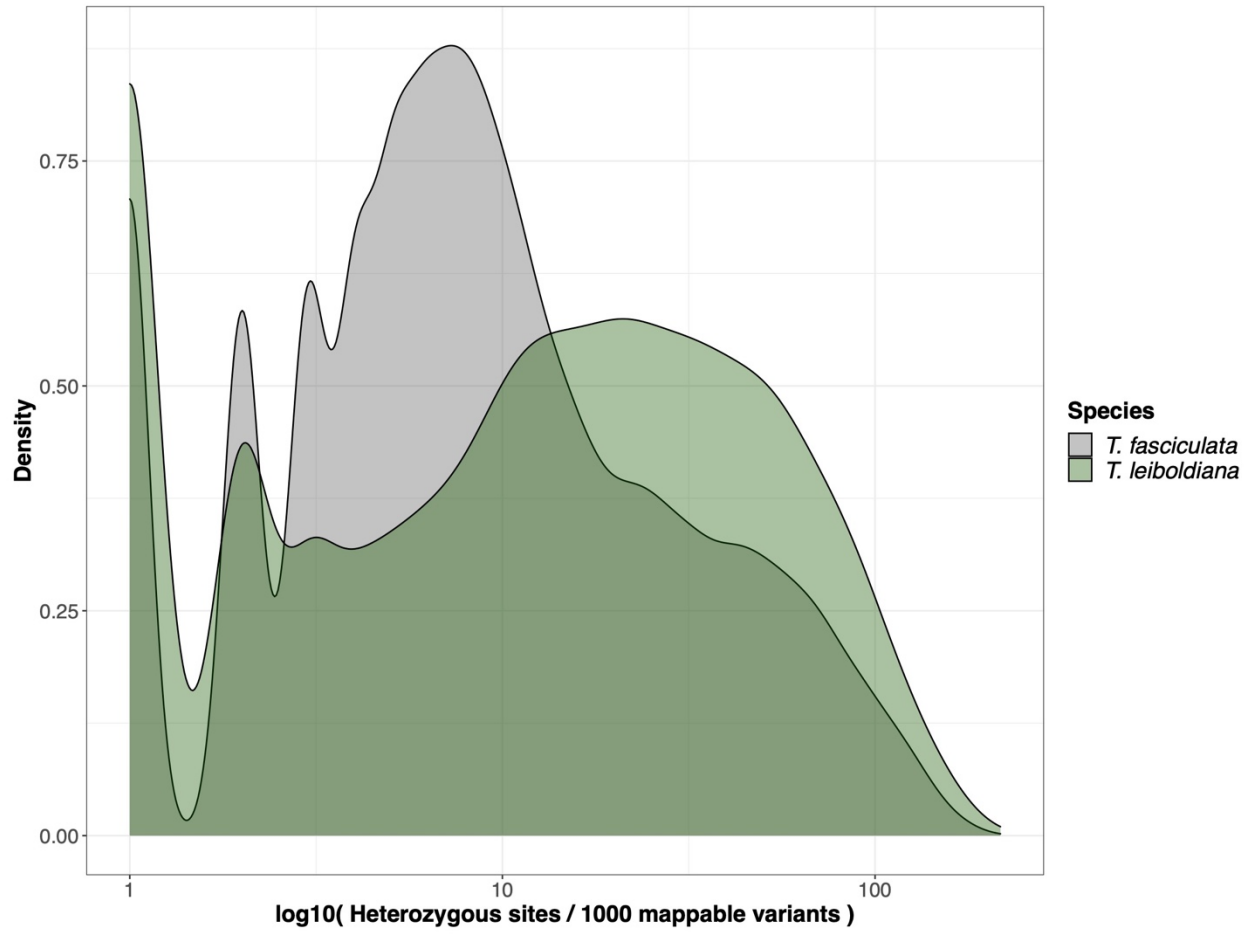

98

99 *Figure S11: Distribution of heterozygous sites per 1000 mappable variants on a logarithmic scale.*

100

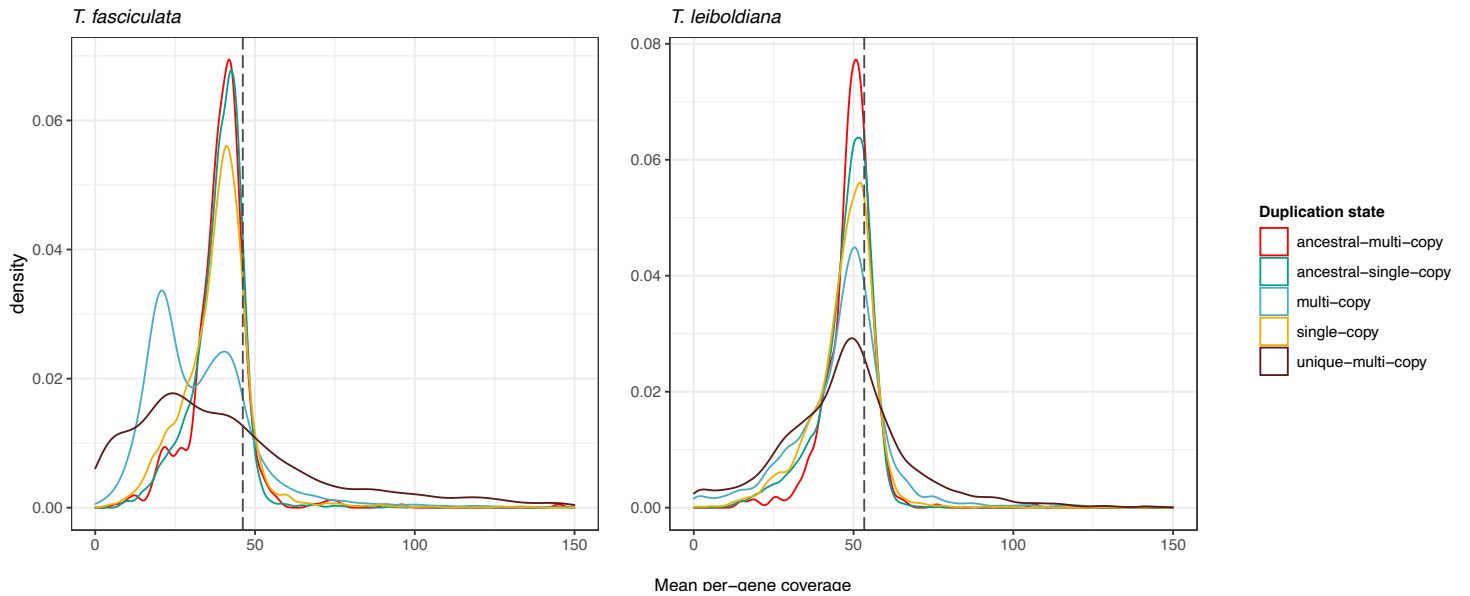

103 *Figure S12: Mean per-gene coverage distribution across different gene family categories in T. fasciculata*  
 104 *(left) and T. leiboldiana (right). For further explanation of the different categories, see SI Note 7. Grey*  
 105 *dashed lines indicate the whole-genome mean coverage.*

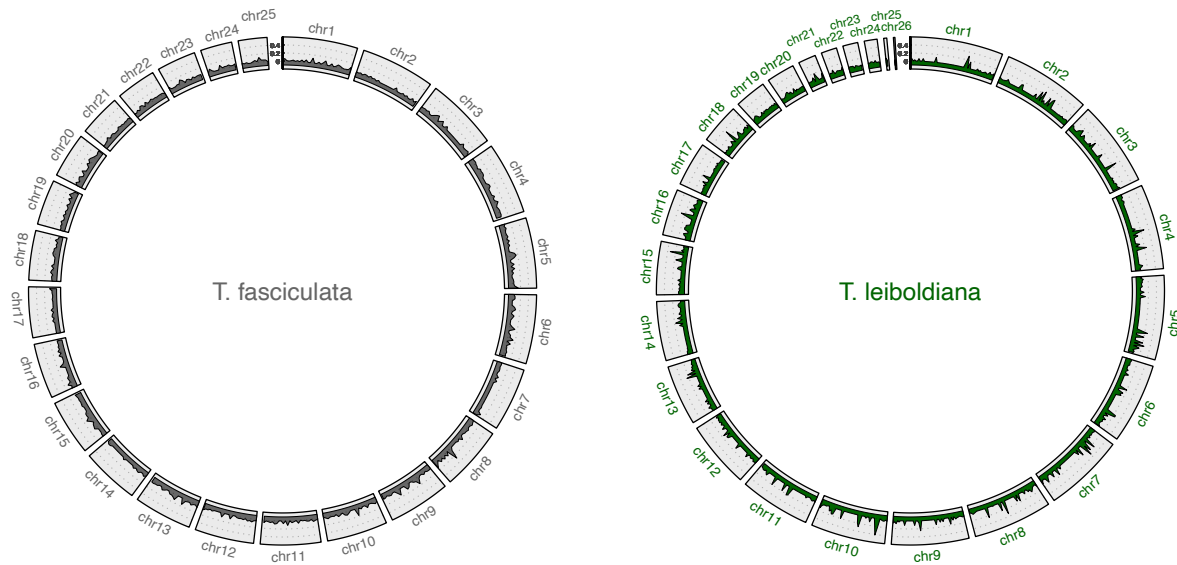

108 *Figure S13: Proportion of genes per 1 Mb window that are differentially expressed across the T.*  
 109 *fasciculata (left) and T. leiboldiana (right) assembly.*

## 2. Supplementary tables

| Table S1: Information on sampling and collection of accessions used in this study.  |                                 |                        |            |                            |                               |            |                                                                                                             |                                                    |  |
|-------------------------------------------------------------------------------------|---------------------------------|------------------------|------------|----------------------------|-------------------------------|------------|-------------------------------------------------------------------------------------------------------------|----------------------------------------------------|--|
| Source                                                                              | Accession code                  | Herbarium accession    | DNA No.    | Collector                  | Species                       | Country    | Locality                                                                                                    | Comment                                            |  |
| Genome Assembly                                                                     |                                 |                        |            |                            |                               |            |                                                                                                             |                                                    |  |
| Botanical Garden of the University of Vienna                                        | HBV 0024657 (B179/91)           | WU 0013642             | MHUB-B1940 | W. & S. Till 7116          | <i>Tillandsia fasciculata</i> | Costa Rica | Prov. Puntarenas, SW declivities of Cordillera de Tilaran, along the road from Sta. Elena to Rancho Grande. |                                                    |  |
| Botanical Garden of the University of Vienna                                        | HBV 0024715 (B82/91)            | WU 0003058             | MHUB-B1942 | W. & S. Till 7112          | <i>Tillandsia leiboldiana</i> | Costa Rica | Prov. Alajuela, 2 km N San Raron                                                                            |                                                    |  |
| RNA-SEQ for Gene Annotation                                                         |                                 |                        |            |                            |                               |            |                                                                                                             |                                                    |  |
| Botanical Garden of the University of Vienna                                        | HBV 0026950 (B103/94)           | WU 0008321             | MHUB-B1839 | G. Nobile 9106             | <i>Tillandsia fasciculata</i> | Guatemala  | Depto. Solola, Lago de Atitlan                                                                              | Originally sequenced for De La Harpe et al. (2020) |  |
| Botanical Garden of the University of Vienna                                        | HBV 0024656 (B108/94)           | WU 0002124             | MHUB-B360  | K.-D. & R. Ehlers EM890701 | <i>Tillandsia fasciculata</i> | Mexico     | Estado, Chiapas, Sumidero Canyon bei Totikla Gutierrez                                                      | Originally sequenced for De La Harpe et al. (2020) |  |
| Botanical Garden of the University of Vienna                                        | HBV 0025322 (B100/91)           | WU 0013632             | MHUB-B2295 | W. & S. Till 7005          | <i>Tillandsia fasciculata</i> | Costa Rica | Prov. Heredia, Barva north of Heredia                                                                       | Originally sequenced for De La Harpe et al. (2020) |  |
| Botanical Garden of the University of Vienna                                        | HBV 0000663 (B84/91, BRCO00613) | WU 0001725; WU 0003008 | MHUB-B323  | W. & S. Till 7043          | <i>Tillandsia leiboldiana</i> | Costa Rica | Prov. Cartago, Turubaba, Centro Agronomico Tropical de Investigacion y Enseñanza (CAITIE)                   |                                                    |  |
| RNA-SEQ for Time Course Experiment                                                  |                                 |                        |            |                            |                               |            |                                                                                                             |                                                    |  |
| Botanical Garden of the University of Vienna                                        | HBV 0025322 (B100/91)           | s. d.                  | MHUB-B2295 | W. & S. Till 7005          | <i>Tillandsia fasciculata</i> | Costa Rica | Prov. Heredia, Barva north of Heredia                                                                       | Tras_E in RNA-seq analysis                         |  |
| Botanical Garden of the University of Vienna                                        | HBV 0025194 (B293/96)           | s. d.                  | MHUB-B2296 | S. Schatzl 7759            | <i>Tillandsia fasciculata</i> | Mexico     | Estado, Jalisco, ca. 20 km S of Porto Valiente alic                                                         | Tras_B in RNA-seq analysis                         |  |
| Botanical Garden of the University of Vienna                                        | HBV 0025334 (B98B53-1)          | WU 0008562; WU 0013708 | MHUB-B1838 | E. Kamm s.n.               | <i>Tillandsia fasciculata</i> | Honduras   | s. d.                                                                                                       | Tras_C in RNA-seq analysis                         |  |
| Botanical Garden of the University of Vienna                                        | HBV 0024655 (B99/91) (90/91)    | WU 0013632; WU 0013754 | MHUB-B1941 | W. & S. Till 7004          | <i>Tillandsia fasciculata</i> | Costa Rica | Prov. Heredia, Barva north of Heredia                                                                       | Tras_D in RNA-seq analysis                         |  |
| Botanical Garden of the University of Vienna                                        | HBV 0025326 (B90/91)            | s. d.                  | MHUB-B2297 | W. & S. Till 7006 (7004)   | <i>Tillandsia fasciculata</i> | Costa Rica | Prov. Heredia, Barva north of Heredia                                                                       | Tras_A in RNA-seq analysis                         |  |
| Botanical Garden of the University of Vienna                                        | HBV 0024657 (B179/91)           | WU 0013642             | MHUB-B1940 | W. & S. Till 7116          | <i>Tillandsia fasciculata</i> | Costa Rica | Prov. Puntarenas, SW declivities of Cordillera de Tilaran, along the road from Sta. Elena to Rancho Grande. | Tras_F in RNA-seq analysis                         |  |
| Botanical Garden of the University of Vienna                                        | HBV 0032437 (Bak 126)           | s. d.                  | MHUB-B1960 | s. d. (DBG Sept. 2011)     | <i>Tillandsia leiboldiana</i> | Costa Rica | above Carteso                                                                                               | Tras_A in RNA-seq analysis                         |  |
| Botanical Garden of the University of Vienna (Com. Bak BV)                          | HBV 0032433 (Bak 27)            | s. d.                  | MHUB-B1957 | P. Bak s.n.                | <i>Tillandsia leiboldiana</i> | Costa Rica | s. d.                                                                                                       | Tras_C in RNA-seq analysis                         |  |
| Botanical Garden of the University of Vienna                                        | HBV 0024715 (B82/91)            | WU 0003058             | MHUB-B1942 | W. & S. Till 7112          | <i>Tillandsia leiboldiana</i> | Costa Rica | Prov. Alajuela, 2 km N San Raron                                                                            | Tras_D in RNA-seq analysis                         |  |
| Botanical Garden of the University of Vienna (Com. Bak BV)                          | HBV 0032436 (Bak 119)           | s. d.                  | MHUB-B1959 | s. d. (DBG Sept. 2011)     | <i>Tillandsia leiboldiana</i> | Mexico     | Estado, Puebla, Amixlan                                                                                     | Tras_E in RNA-seq analysis                         |  |
| Botanical Garden of the University of Vienna (Com. Bak BV)                          | HBV 0032434 (Bak 37)            | s. d.                  | MHUB-B1958 | P. Bak s.n.                | <i>Tillandsia leiboldiana</i> | Costa Rica | s. d.                                                                                                       | Tras_F in RNA-seq analysis                         |  |
| Botanical Garden of the University of Vienna (Com. Bak BV)                          | HBV 0032435 (Bak 45)            | s. d.                  | MHUB-B1956 | P. Bak s.n.                | <i>Tillandsia leiboldiana</i> | Honduras   | s. d.                                                                                                       | Tras_G in RNA-seq analysis                         |  |
| Abbreviations in Table:                                                             |                                 |                        |            |                            |                               |            |                                                                                                             |                                                    |  |
| WU = Institutional Code (Wien Universität)                                          |                                 |                        |            |                            |                               |            |                                                                                                             |                                                    |  |
| HBV = Hortus Botanicus Vindobonensis (Botanical Garden of the University of Vienna) |                                 |                        |            |                            |                               |            |                                                                                                             |                                                    |  |
| DBG = Deutsche Bromelien-Gesellschaft (German Bromeliad Society)                    |                                 |                        |            |                            |                               |            |                                                                                                             |                                                    |  |
| s.n. = sin numero (without number)                                                  |                                 |                        |            |                            |                               |            |                                                                                                             |                                                    |  |
| s. d. = sin datos (without data)                                                    |                                 |                        |            |                            |                               |            |                                                                                                             |                                                    |  |

111

112

113

114

115

116

Table S2: Summary statistics of the *T. fasciculata* and *T. leiboldiana* assembly and gene annotation

| Assembly statistics                  | <i>T. fasciculata</i> | <i>T. leiboldiana</i> |
|--------------------------------------|-----------------------|-----------------------|
| Total length (bp)                    | 837,577,910           | 1,198,225,148         |
| Total scaffold count (> 1 kb)        | 2,321                 | 10,433                |
| Total contig count                   | 8,625                 | 20,447                |
| N50 (Mb)                             | 23,642                | 43,365                |
| N90 (Kb)                             | 145,438               | 27,985                |
| L50                                  | 16                    | 12                    |
| L90                                  | 565                   | 2,898                 |
| GC content                           | 42.81 %               | 44.73 %               |
| Uniquely mapping RNA-seq reads       | 69.13 %               | 92.37 %               |
| Complete BUSCO genes                 | 91.8 %                | 88.1 %                |
| Duplicated BUSCO genes               | 6.2 %                 | 1.9 %                 |
| Fragmented BUSCO genes               | 5.2 %                 | 5.4 %                 |
| Gene model statistics                | <i>T. fasciculata</i> | <i>T. leiboldiana</i> |
| Gene model count                     | 34,886                | 38,180                |
| Average length (bp)                  | 4,090                 | 4,225                 |
| Complete BUSCO genes                 | 89.7 %                | 85.3 %                |
| Duplicated BUSCO genes               | 11.6 %                | 6.5 %                 |
| Fragmented BUSCO genes               | 5.2 %                 | 7.9 %                 |
| Uniquely mapping RNA-seq reads       | 64.61 %               | 84.76 %               |
| Gene models with AED-score > 0.5     | 93 %                  | 89.9 %                |
| Scaffolds containing gene models     | 1,191                 | 2,621                 |
| Statistics of functional annotation  | <i>T. fasciculata</i> | <i>T. leiboldiana</i> |
| Gene models with BLAST               | 31,883                | 33,971                |
| Gene models with GO terms            | 26,505                | 27,148                |
| Gene models with Blast2Go annotation | 24,319                | 24,633                |

117  
118  
119  
120  
121  
122  
123  
124  
125  
126  
127  
128

| Table S3: Abundances of LTR, TIR and Helitron classes in main contigs of <i>T. fasciculata</i> and <i>T. leiboldiana</i> |               |                               |                   |                      |                               |                   |                      |
|--------------------------------------------------------------------------------------------------------------------------|---------------|-------------------------------|-------------------|----------------------|-------------------------------|-------------------|----------------------|
| Class                                                                                                                    | Type          | <i>Tillandsia fasciculata</i> |                   |                      | <i>Tillandsia leiboldiana</i> |                   |                      |
|                                                                                                                          |               | Element count                 | Total length (bp) | Proportion of genome | Element count                 | Total length (bp) | Proportion of genome |
| LTR                                                                                                                      | Total         | 692,254                       | 392,992,866       | 65.52 %              | 1,268,380                     | 697,969,745       | 77.07 %              |
|                                                                                                                          | Copia         | 85,077                        | 72,241,681        | 12.04 %              | 226,304                       | 117,239,901       | 12.95 %              |
|                                                                                                                          | Gypsy         | 136,750                       | 130,003,938       | 21.67 %              | 243,366                       | 215,847,337       | 23.84 %              |
|                                                                                                                          | Unknown       | 179,371                       | 110,637,301       | 18.45 %              | 357,701                       | 222,072,889       | 24.52 %              |
|                                                                                                                          | Total         | 401,198                       | 312,882,920       | 52.16 %              | 827,371                       | 555,160,127       | 61.31 %              |
| TIR                                                                                                                      | CACTA         | 26,027                        | 6,822,973         | 1.14 %               | 22,788                        | 6,785,096         | 0.75 %               |
|                                                                                                                          | Mutator       | 78,405                        | 20,912,187        | 3.49 %               | 227,557                       | 87,286,075        | 9.64 %               |
|                                                                                                                          | PIF_Harbinger | 13,059                        | 3,335,951         | 0.56 %               | 14,124                        | 3,580,678         | 0.4 %                |
|                                                                                                                          | Tc1_Mariner   | 3,435                         | 648,896           | 0.11 %               | 1,589                         | 372,253           | 0.04 %               |
|                                                                                                                          | hAT           | 31,871                        | 8,365,061         | 1.39 %               | 21,951                        | 6,587,992         | 0.73 %               |
|                                                                                                                          | Total         | 152,797                       | 40,085,068        | 6.69 %               | 288,009                       | 104,612,094       | 11.56 %              |
| Helitron                                                                                                                 | Helitron      | 118,069                       | 35,165,625        | 5.86 %               | 130,790                       | 33,461,880        | 3.7 %                |



Table S4: Orthology statistics before and after curation (removal of plastid genes and size correction). Size correction was not applied to *A. comosus*, however, unique genes to this species were removed from the dataset.

| General and single-copy statistics                                            | Before curation   |                       |                       |         | After curation    |                       |                       |  |
|-------------------------------------------------------------------------------|-------------------|-----------------------|-----------------------|---------|-------------------|-----------------------|-----------------------|--|
|                                                                               | <i>A. comosus</i> | <i>T. fasciculata</i> | <i>T. leiboldiana</i> |         | <i>A. comosus</i> | <i>T. fasciculata</i> | <i>T. leiboldiana</i> |  |
| Number of genes assigned to orthogroups                                       | 21,045            | 26,325                | 23,584                | 20,416  | 24,397            | 22,968                | -                     |  |
| Proportion of input sequences assigned                                        | 78 %              | 87.5 %                | 75 %                  | -       | -                 | -                     | -                     |  |
| Number of single-copy genes in a given species                                | 12,794            | 14,311                | 15,537                | 12,602  | 15,236            | 15,479                | -                     |  |
| Proportion                                                                    | 52.5 %            | 54.36 %               | 65.88 %               | 61.73 % | 62.45 %           | 67.39 %               | -                     |  |
| Number of single-copy orthologues (1:1:1)                                     | 10,012            | 10,012                | 10,012                | 10,707  | 10,707            | 10,707                | -                     |  |
| Proportion                                                                    | 47.57 %           | 38.03 %               | 42.45 %               | 52.44 % | 43.89 %           | 46.62 %               | -                     |  |
| Number of single-copy orthologues in <i>Tillandsia</i>                        | -                 | 13,128                | 13,128                | -       | 14,086            | 14,086                | -                     |  |
| Proportion                                                                    | -                 | 49.87 %               | 55.66 %               | -       | 57.74 %           | 61.33 %               | -                     |  |
| <b>Multi-copy statistics</b>                                                  |                   |                       |                       |         |                   |                       |                       |  |
| Number of multi-copy genes in a given species                                 | 8,260             | 12,014                | 8,011                 | 7,809   | 9,161             | 7,489                 | -                     |  |
| Proportion                                                                    | 39.25 %           | 45.64 %               | 33.97 %               | 38.25 % | 37.55 %           | 32.6 %                | -                     |  |
| Number of genes in orthogroups with family size <i>T. fas</i> > <i>T. lei</i> | 2,594             | 6,976                 | 2,709                 | 1,178   | 4,170             | 1,356                 | -                     |  |
| Proportion                                                                    | 12.33 %           | 26.50 %               | 11.49 %               | 5.77 %  | 17.09 %           | 5.9 %                 | -                     |  |
| Number of genes in orthogroups with family size <i>T. fas</i> < <i>T. lei</i> | 817               | 905                   | 2,222                 | 725     | 833               | 2,079                 | -                     |  |
| Proportion                                                                    | 3.88 %            | 3.44 %                | 9.42 %                | 35.51 % | 34.14 %           | 9.05 %                | -                     |  |
| Number of genes in orthogroups with family size <i>T. fas</i> = <i>T. lei</i> | 1,244             | 1,265                 | 1,265                 | 1,291   | 1,258             | 1,258                 | -                     |  |
| Proportion                                                                    | 5.91 %            | 4.81 %                | 5.36 %                | 6.32 %  | 4.6 %             | 4.6 %                 | -                     |  |
| <b>Unique gene statistics</b>                                                 |                   |                       |                       |         |                   |                       |                       |  |
| Number of unique genes                                                        | -                 | 3,101                 | 3,192                 | -       | 3,051             | 3,154                 | -                     |  |
| Proportion                                                                    | -                 | 14.74 %               | 13.53 %               | -       | 12.51 %           | 13.73 %               | -                     |  |

Table S5: List of potentially CAM-related expanded gene families in either *T. fasciculata* or *T. leiboldiana*.

| Orthogroup           | Conformation of gene family size ( <i>A.comos</i> )                                                                                                                                                                                                                                                                                                               | Function                                                                        | Description                                                                                                                                                                                                                                                                                                                                                                                                                      | Differentially expressed |
|----------------------|-------------------------------------------------------------------------------------------------------------------------------------------------------------------------------------------------------------------------------------------------------------------------------------------------------------------------------------------------------------------|---------------------------------------------------------------------------------|----------------------------------------------------------------------------------------------------------------------------------------------------------------------------------------------------------------------------------------------------------------------------------------------------------------------------------------------------------------------------------------------------------------------------------|--------------------------|
| OG0005285            | 1 : 1 : 2                                                                                                                                                                                                                                                                                                                                                         | Malate dehydrogenase, cytoplasmic                                               | Catalyses the conversion of malate to oxaloacetate bidirectionally in the cytoplasm                                                                                                                                                                                                                                                                                                                                              | No                       |
| OG0002059            | 2 : 2 : 1                                                                                                                                                                                                                                                                                                                                                         | NAD-dependent malate dehydrogenase, mitochondrial                               | Catalyses the conversion of malate to oxaloacetate bidirectionally in the mitochondrial matrix                                                                                                                                                                                                                                                                                                                                   | No                       |
| OG0000469            | 0 : 15 : 1                                                                                                                                                                                                                                                                                                                                                        | Cytosolic enolase 3                                                             | Catalyses the conversion of 2-phosphoglycerate (2-PG) to phosphoenolpyruvate (PEP)                                                                                                                                                                                                                                                                                                                                               | No                       |
| OG0000555            | 0 : 7 : 1                                                                                                                                                                                                                                                                                                                                                         | enolase                                                                         | Catalyses the conversion of 2-phosphoglycerate (2-PG) to phosphoenolpyruvate (PEP)                                                                                                                                                                                                                                                                                                                                               | No                       |
| OG0005044            | 1 : 2 : 1                                                                                                                                                                                                                                                                                                                                                         | Protein XAP5 CIRCADIAN TIMEKEEPER                                               | Involved in the regulation of light response[1], the circadian clock[2], and disease resistance[3].                                                                                                                                                                                                                                                                                                                              | Yes                      |
| OG0000539, OG0004427 | 2 : 8 : 3 , 1 : 2 : 1                                                                                                                                                                                                                                                                                                                                             | Vacuolar-type proton ATPase subunit H                                           | Subunit of a proton pump involved in the acidification of intracellular organelles. Subunit H has a regulatory role in the activity of the ATPase, not in the assembly.                                                                                                                                                                                                                                                          | Yes, No                  |
| OG0001440            | 2 : 2 : 1                                                                                                                                                                                                                                                                                                                                                         | Succinate dehydrogenase [ubiquinone] flavoprotein subunit, mitochondrial (SDHA) | Subunit of the Succinate-ubiquinone oxidoreductase complex (complex II), which is simultaneously a member of the mitochondrial respiratory chain and of the tricarboxylic acid cycle. SDHA converts succinate to fumarate and FAD to FADH <sub>2</sub> , therefore playing a role in both pathways. Succinate dehydrogenase has been linked to photosynthetic activity and regulation of stomatal opening in <i>Solanum</i> [4]. | No                       |
| OG0003437            | 1 : 2 : 1                                                                                                                                                                                                                                                                                                                                                         | succinate dehydrogenase subunit 6, mitochondrial                                | Plant-specific [5] subunit of the succinate dehydrogenase complex involved in anchoring the complex to the membrane[6].                                                                                                                                                                                                                                                                                                          | Yes                      |
| OG0005172            | 1 : 2 : 1                                                                                                                                                                                                                                                                                                                                                         | isocitrate dehydrogenase [NAD] catalytic subunit 5, mitochondrial               | Member of the tricarboxylic acid cycle                                                                                                                                                                                                                                                                                                                                                                                           | Yes                      |
| OG0000601            | 3 : 3 : 2                                                                                                                                                                                                                                                                                                                                                         | V-type_proton_ATPase_16_kDa_proteolipid_subunit_c1                              | Vacuolar proton pump potentially linked to CAM through circadian rhythm regulation and/or malate transport (See Fig. 5)                                                                                                                                                                                                                                                                                                          | Yes                      |
| OG0002114            | 1 : 1 : 3                                                                                                                                                                                                                                                                                                                                                         | Regulator of V-ATPase in vacuolar membrane protein 1                            | Regulator of vacuolar proton pump                                                                                                                                                                                                                                                                                                                                                                                                | No                       |
| OG0000320            | 4 : 4 : 5                                                                                                                                                                                                                                                                                                                                                         | glyceraldehyde-3-phosphate dehydrogenase 2, cytosolic                           | Member of the glycolysis                                                                                                                                                                                                                                                                                                                                                                                                         | No                       |
| OG0001933            | 2 : 1 : 2                                                                                                                                                                                                                                                                                                                                                         | phosphoglycerate kinase, chloroplastic                                          | Member of the glycolysis                                                                                                                                                                                                                                                                                                                                                                                                         | No                       |
| OG0000507            | 7 : 1 : 2                                                                                                                                                                                                                                                                                                                                                         | Isocitrate_dehydrogenase_NADP_1.1.1.42                                          | Member of the tricarboxylic acid cycle                                                                                                                                                                                                                                                                                                                                                                                           | No                       |
| Citations            |                                                                                                                                                                                                                                                                                                                                                                   |                                                                                 |                                                                                                                                                                                                                                                                                                                                                                                                                                  |                          |
| [1]                  | Ellen L. Martin-Tryon, Stacey L. Harmer, XAP5 CIRCADIAN TIMEKEEPER Coordinates Light Signals for Proper Timing of Photomorphogenesis and the Circadian Clock in <i>Arabidopsis</i> , <i>The Plant Cell</i> , Volume 20, Issue 5, May 2008, Pages 1244–1259, <a href="https://doi.org/10.1105/tpc.107.056655">https://doi.org/10.1105/tpc.107.056655</a>           |                                                                                 |                                                                                                                                                                                                                                                                                                                                                                                                                                  |                          |
| [2]                  | Liu, Lei, Xiaoyun Li, Li Yuan, Guofang Zhang, Hui Gao, Xiaodong Xu, and Hongtao Zhao. "XAP5 CIRCADIAN TIMEKEEPER specifically modulates 3' splice site recognition and is important for circadian clock regulation partly by alternative splicing of LHY and TIC." <i>Plant Physiology and Biochemistry</i> 172 (2022): 151-157.                                  |                                                                                 |                                                                                                                                                                                                                                                                                                                                                                                                                                  |                          |
| [3]                  | Xu, Yong-Ju, Yang Lei, Ran Li, Ling-Li Zhang, Zhi-Xue Zhao, Jing-Hao Zhao, Jing Fan et al. "XAP5 CIRCADIAN TIMEKEEPER Positively Regulates RESISTANCE TO POWDERY MILDEW. 1–Mediated Immunity in <i>Arabidopsis</i> ." <i>Frontiers in Plant Science</i> 8 (2017): 2044.                                                                                           |                                                                                 |                                                                                                                                                                                                                                                                                                                                                                                                                                  |                          |
| [4]                  | Araújo WL, Nunes-Nesi A, Osorio S, et al. Antisense inhibition of the iron-sulphur subunit of succinate dehydrogenase enhances photosynthesis and growth in tomato via an organic acid-mediated effect on stomatal aperture. <i>Plant Cell</i> . 2011;23(2):600-627. doi:10.1105/tpc.110.081224                                                                   |                                                                                 |                                                                                                                                                                                                                                                                                                                                                                                                                                  |                          |
| [5]                  | Millar AH, Eubel H, Jansch L, Kruff V, Heazlewood JL, Braun HP. Mitochondrial cytochrome c oxidase and succinate dehydrogenase complexes contain plant specific subunits. <i>Plant Mol Biol</i> . 2004;56(1):77-90. doi:10.1007/s11103-004-2316-2                                                                                                                 |                                                                                 |                                                                                                                                                                                                                                                                                                                                                                                                                                  |                          |
| [6]                  | Christine Schikowsky, Jennifer Senkler, Hans-Peter Braun, SDH6 and SDH7 Contribute to Anchoring Succinate Dehydrogenase to the Inner Mitochondrial Membrane in <i>Arabidopsis thaliana</i> , <i>Plant Physiology</i> , Volume 173, Issue 2, February 2017, Pages 1094–1108, <a href="https://doi.org/10.1104/pp.16.01675">https://doi.org/10.1104/pp.16.01675</a> |                                                                                 |                                                                                                                                                                                                                                                                                                                                                                                                                                  |                          |

Table S6: Full list of candidate genes for adaptive sequence evolution.

| One-to-one orthologues |                                     |        |              |                                      |  |
|------------------------|-------------------------------------|--------|--------------|--------------------------------------|--|
| Orthogroup             | Genes                               | dN/dS  | adj. p-value | Function                             |  |
| OG0002972              | Tfasc_v1.01130-RA, Tlei_v1.02341-RA | Inf    | 0,00162      | jacalin-related lectin 3-like        |  |
| OG0005000              | Tfasc_v1.24851-RA, Tlei_v1.26186-RA | Inf    | 0,00628      | cucumber peeling cupredoxin-like     |  |
| OG0006253              | Tfasc_v1.06027-RA, Tlei_v1.01410-RA | Inf    | 0,00066      | mitochondrial prohibitin-3           |  |
| OG0008124              | Tfasc_v1.15280-RB, Tlei_v1.22017-RA | 3,1536 | 0,01368      | isoform X1                           |  |
| OG0008528              | Tfasc_v1.04577-RA, Tlei_v1.08412-RA | 8,17   | 0,01292      | hypothetical protein ACMD2_08159     |  |
| OG0008977              | Tfasc_v1.16327-RA, Tlei_v1.06894-RA | 2,6204 | 0,00512      | glutamate receptor 2.8-like          |  |
| OG0009004              | Tfasc_v1.16390-RA, Tlei_v1.06962-RA | 3,1379 | 0,01148      | Hydroquinone glycosyltransferase     |  |
| OG0009278              | Tfasc_v1.29917-RA, Tlei_v1.20972-RA | Inf    | 0,00155      | chloroplastic Peroxiredoxin-2-E-2    |  |
| OG0010014              | Tfasc_v1.26649-RA, Tlei_v1.28282-RA | 2,0042 | 0,00603      | GDPDL7                               |  |
| OG0011786              | Tfasc_v1.12421-RA, Tlei_v1.10008-RA | 9,2985 | 0,00008      | U-box domain-containing protein      |  |
| OG0012770              | Tfasc_v1.15761-RA, Tlei_v1.22494-RA | Inf    | 0,01374      | superfamily protein                  |  |
| OG0015603              | Tfasc_v1.14595-RA, Tlei_v1.21364-RA | 8,0697 | 0,01575      | CDC27                                |  |
| OG0019176              | Tfasc_v1.13382-RA, Tlei_v1.18537-RA | 2,8534 | 0,00561      | uncharacterized protein LOC109718296 |  |
| 1:1:2 orthologues      |                                     |        |              |                                      |  |
| OG0003849              | Tfasc_v1.03397-RA, Tlei_v1.09369-RA | Inf    | 0,00697      | kinesin-like protein KIN-10C         |  |
|                        | Tfasc_v1.03397-RA, Tlei_v1.09368-RA | 4,1684 | 0,09607      |                                      |  |
| 1:2:1 orthologues      |                                     |        |              |                                      |  |
| OG0003795              | Tfasc_v1.16138-RA, Tlei_v1.06694-RA | 6,2573 | 0,02611      | Ubiquitin-conjugating enzyme E2      |  |
|                        | Tfasc_v1.16140-RA, Tlei_v1.06694-RA | 0,2438 | 0,03386      |                                      |  |
| OG0004404              | Tfasc_v1.08653-RA, Tlei_v1.17093-RA | 3,9913 | 0,02787      | protein ECERIFERUM 1-like            |  |
|                        | Tfasc_v1.21655-RA, Tlei_v1.17093-RA | 0,1733 | 0,00059      |                                      |  |

| Table S7: Description of gene clusters inferred in co-expression analyses from maSigPro |                                                                                                                                                                                                                                                             |                                                                                                                                                                                                                                                                                                                                                                                                                                                                                                                                                                                                                                                                                                                                                                                                                                                                                                                                                                                                                                                                                                                                                                                                                                                                                                                                                                                                                                                                                                                                                                                                                                                                                                                                                                                                                       |                                                                                                                                                                                                                                                                                                                                                                                                                                                                                                                                                                                                                                                                                                                                       |
|-----------------------------------------------------------------------------------------|-------------------------------------------------------------------------------------------------------------------------------------------------------------------------------------------------------------------------------------------------------------|-----------------------------------------------------------------------------------------------------------------------------------------------------------------------------------------------------------------------------------------------------------------------------------------------------------------------------------------------------------------------------------------------------------------------------------------------------------------------------------------------------------------------------------------------------------------------------------------------------------------------------------------------------------------------------------------------------------------------------------------------------------------------------------------------------------------------------------------------------------------------------------------------------------------------------------------------------------------------------------------------------------------------------------------------------------------------------------------------------------------------------------------------------------------------------------------------------------------------------------------------------------------------------------------------------------------------------------------------------------------------------------------------------------------------------------------------------------------------------------------------------------------------------------------------------------------------------------------------------------------------------------------------------------------------------------------------------------------------------------------------------------------------------------------------------------------------|---------------------------------------------------------------------------------------------------------------------------------------------------------------------------------------------------------------------------------------------------------------------------------------------------------------------------------------------------------------------------------------------------------------------------------------------------------------------------------------------------------------------------------------------------------------------------------------------------------------------------------------------------------------------------------------------------------------------------------------|
| Cluster                                                                                 | Number of genes                                                                                                                                                                                                                                             | Genes of interest                                                                                                                                                                                                                                                                                                                                                                                                                                                                                                                                                                                                                                                                                                                                                                                                                                                                                                                                                                                                                                                                                                                                                                                                                                                                                                                                                                                                                                                                                                                                                                                                                                                                                                                                                                                                     | GO terms of interest                                                                                                                                                                                                                                                                                                                                                                                                                                                                                                                                                                                                                                                                                                                  |
| 1                                                                                       | 87                                                                                                                                                                                                                                                          | Tfasc_v1.23066: protein LNK1-like;<br>Tfasc_v1.19779: Dicarboxylate transporter 1, chloroplastic;<br>Tfasc_v1.08739: mitochondrial uncoupling protein 5-like;<br>Tfasc_v1.00158: ABC transporter G family member 5-like;<br>Tfasc_v1.01823: Protein REVEILLE 1 [1];<br>Tfasc_v1.03880: Transcription factor PCF2 [2];<br>Tfasc_v1.06881*: protein LHY-like isoform X1 [2];<br>Tfasc_v1.09028: aluminum-activated malate transporter 9-like isoform X1 [1]                                                                                                                                                                                                                                                                                                                                                                                                                                                                                                                                                                                                                                                                                                                                                                                                                                                                                                                                                                                                                                                                                                                                                                                                                                                                                                                                                             | GO:1902356: oxaloacetate(2-) transmembrane transport;<br>GO:0071423: malate transmembrane transport;<br>GO:1902074: response to salt;<br>GO:0071472: cellular response to salt stress;<br>GO:1902584: positive regulation of response to water deprivation;<br>GO:1901002: positive regulation of response to salt stress;<br>GO:0015131: oxaloacetate transmembrane transporter activity;<br>GO:0015140: malate transmembrane transporter activity                                                                                                                                                                                                                                                                                   |
| 2                                                                                       | 134                                                                                                                                                                                                                                                         | Tfasc_v1.25154: V-type proton ATPase catalytic subunit A [3];<br>Tfasc_v1.11797: protein XAP5 CIRCADIAN TIMEKEEPER [3];<br>Tfasc_v1.21051: V-type proton ATPase subunit e1;<br>Tfasc_v1.15469*: Acyl-coenzyme A thioesterase [2];<br>Tfasc_v1.19221: Pyrophosphate-fructose 6-phosphate 1-phosphotransferase subunit alpha;<br>Tfasc_v1.12690*: pentatricopeptide repeat-containing protein At1g09900-like [2];                                                                                                                                                                                                                                                                                                                                                                                                                                                                                                                                                                                                                                                                                                                                                                                                                                                                                                                                                                                                                                                                                                                                                                                                                                                                                                                                                                                                       | GO:0033179: proton-transporting V-type ATPase, V0 domain;<br>GO:0047334: diphosphate-fructose-6-phosphate 1-phosphotransferase activity                                                                                                                                                                                                                                                                                                                                                                                                                                                                                                                                                                                               |
| 3                                                                                       | 38                                                                                                                                                                                                                                                          | Tfasc_v1.09150: protein HOMOLOG OF MAMMALIAN LYST-INTERACTING PROTEIN 5;<br>Tfasc_v1.03774: probable aquaporin PIP2-6 [4];<br>Tfasc_v1.14176*: long chain acyl-CoA synthetase 4-like [2];<br>Tfasc_v1.24696: V-type proton ATPase subunit H-like [5];<br>Tfasc_v1.25341: pyrophosphate-energized vacuolar membrane proton pump [3];<br>Tfasc_v1.28097: F-box/kelch-repeat protein SKIP25 [2]                                                                                                                                                                                                                                                                                                                                                                                                                                                                                                                                                                                                                                                                                                                                                                                                                                                                                                                                                                                                                                                                                                                                                                                                                                                                                                                                                                                                                          | GO:0007623: circadian rhythm;<br>GO:0010378: temperature compensation of the circadian clock;<br>GO:0046323: glucose import;<br>GO:0009637: response to blue light;<br>GO:0048578: positive regulation of long-day photoperiodism, flowering;<br>GO:0071482: cellular response to light stimulus                                                                                                                                                                                                                                                                                                                                                                                                                                      |
| 4                                                                                       | 99                                                                                                                                                                                                                                                          | Tfasc_v1.09150: protein HOMOLOG OF MAMMALIAN LYST-INTERACTING PROTEIN 5;<br>Tfasc_v1.03774: probable aquaporin PIP2-6 [4];<br>Tfasc_v1.14176: long chain acyl-CoA synthetase 4-like [2];<br>Tfasc_v1.24696: V-type proton ATPase subunit H-like [5];<br>Tfasc_v1.25341: pyrophosphate-energized vacuolar membrane proton pump [3];<br>Tfasc_v1.28097: F-box/kelch-repeat protein SKIP25 [2]                                                                                                                                                                                                                                                                                                                                                                                                                                                                                                                                                                                                                                                                                                                                                                                                                                                                                                                                                                                                                                                                                                                                                                                                                                                                                                                                                                                                                           | GO:1903335: regulation of vacuolar transport;<br>GO:0002221: vacuolar proton-transporting V-type ATPase, V1 domain                                                                                                                                                                                                                                                                                                                                                                                                                                                                                                                                                                                                                    |
| 5                                                                                       | 209                                                                                                                                                                                                                                                         | Tfasc_v1.01733: V-type proton ATPase 16 kDa proteolipid subunit [2];<br>Tfasc_v1.16595: soluble starch synthase I;<br>Tfasc_v1.21461: Pyruvate kinase, cytosolic isozyme [2][6];<br>Tfasc_v1.16311: Phosphoenolpyruvate carboxylase (PEPC) [7];<br>Tfasc_v1.03126: malate dehydrogenase [7];<br>Tfasc_v1.03128: PEPC kinase [7];<br>Tfasc_v1.06749: phosphogluconate phosphatase DSP4, amyloplastic isoform X1;<br>Tfasc_v1.09378: V-type proton ATPase subunit d2 [2][5];<br>Tfasc_v1.20370: ATP-dependent 6-phosphofructokinase 5, chloroplastic;<br>Tfasc_v1.24086: ATP-dependent 6-phosphofructokinase 3;<br>Tfasc_v1.17156: aconitate hydratase;<br>Tfasc_v1.04514: glucose-6-phosphate isomerase, cytosolic;<br>Tfasc_v1.07899: phosphoenolpyruvate carboxylase (ATP);<br>Tfasc_v1.26280: protein MAEA homolog;<br>Tfasc_v1.27863: pyruvate decarboxylase 1;<br>Tfasc_v1.03307: V-type proton ATPase subunit a3 [5];<br>Tfasc_v1.00598: nuclear pore complex protein NUP50A-like [2];<br>Tfasc_v1.01511: late embryogenesis abundant protein Lea5-like [8];<br>Tfasc_v1.03613*: probable pyruvate, phosphate dikinase regulatory protein, chloroplastic [2][7];<br>Tfasc_v1.14299: late embryogenesis abundant protein group 8 protein [8];<br>Tfasc_v1.14724: V-type proton ATPase subunit B 2 [3];<br>Tfasc_v1.15525: protein YLS7-like [2];<br>Tfasc_v1.16080: V-type proton ATPase subunit c'2 [2][5];<br>Tfasc_v1.17712: V-type proton ATPase subunit C [3];<br>Tfasc_v1.18209: V-type proton ATPase subunit G 1-like [3];<br>Tfasc_v1.19718: F-box protein At1g55000 [2];<br>Tfasc_v1.19742: V-type proton ATPase subunit H [5];<br>Tfasc_v1.26860: gamma-aminobutyrate transaminase 1, mitochondrial [2];<br>Tfasc_v1.28537: protein FD [9];<br>Tfasc_v1.28610: uncharacterized protein LOC109727440 [9] | GO:0005983: starch catabolic process;<br>GO:0061615: glycolytic process through fructose-6-phosphate;<br>GO:0006099: tricarboxylic acid cycle;<br>GO:0006094: gluconeogenesis;<br>GO:0006002: fructose 6-phosphate metabolic process;<br>GO:0045721: negative regulation of gluconeogenesis;<br>GO:0007035: vacuolar acidification;<br>GO:0006107: oxaloacetate metabolic process;<br>GO:0004737: pyruvate decarboxylase activity;<br>GO:0004612: phosphoenolpyruvate carboxylase (ATP) activity;<br>GO:0008964: phosphoenolpyruvate carboxylase activity;<br>GO:0046961: proton-transporting ATPase activity, rotational mechanism;<br>GO:0047780: citrate hydratase activity;<br>GO:0004347: glucose-6-phosphate isomerase activity |
| 6                                                                                       | 144                                                                                                                                                                                                                                                         | Tfasc_v1.20354: sucrose transport protein SUT1-like [3];<br>Tfasc_v1.25107: VMA21-like domain-containing protein;<br>Tfasc_v1.06152*: Protein EDS1L [2];<br>Tfasc_v1.08627: WAT1-related protein [2];<br>Tfasc_v1.16433: arabinogalactan peptide 16-like [2];<br>Tfasc_v1.24231*: replication stress response regulator SDE2 [2];<br>Tfasc_v1.30364*: protein FLX-like 4 [2];<br>Tfasc_v1.25107: VMA21-like domain-containing protein;<br>Tfasc_v1.26899: obg-like ATPase 1;<br>Tfasc_v1.25528: granule-bound starch synthase                                                                                                                                                                                                                                                                                                                                                                                                                                                                                                                                                                                                                                                                                                                                                                                                                                                                                                                                                                                                                                                                                                                                                                                                                                                                                         | GO:0015770: sucrose transport;<br>GO:0015768: maltose transport;<br>GO:0070072: vacuolar proton-transporting V-type ATPase complex assembly;<br>GO:1901001: negative regulation of response to salt stress;<br>GO:0005364: maltose:proton symporter activity;<br>GO:0003985: acetyl-CoA C-acetyltransferase activity;<br>GO:0004373: glycogen (starch) synthase activity                                                                                                                                                                                                                                                                                                                                                              |
| 7                                                                                       | 196                                                                                                                                                                                                                                                         | Tfasc_v1.30467: isocitrate dehydrogenase [NAD] catalytic subunit 5, mitochondrial;<br>Tfasc_v1.21339: catalase isozyme 1;<br>Tfasc_v1.12645: flavonoid 3',5'-hydroxylase 2-like [2];<br>Tfasc_v1.25055*: berberine bridge enzyme-like 18 [2];<br>Tfasc_v1.29220: ABC transporter C family member 14-like [3]                                                                                                                                                                                                                                                                                                                                                                                                                                                                                                                                                                                                                                                                                                                                                                                                                                                                                                                                                                                                                                                                                                                                                                                                                                                                                                                                                                                                                                                                                                          | GO:1902074: response to salt;<br>GO:1900034: regulation of cellular response to heat;<br>GO:0004449: isocitrate dehydrogenase (NAD+) activity                                                                                                                                                                                                                                                                                                                                                                                                                                                                                                                                                                                         |
|                                                                                         |                                                                                                                                                                                                                                                             | * Candidate gene for adaptive sequence evolution in CAMC3 shifts reported in [2]                                                                                                                                                                                                                                                                                                                                                                                                                                                                                                                                                                                                                                                                                                                                                                                                                                                                                                                                                                                                                                                                                                                                                                                                                                                                                                                                                                                                                                                                                                                                                                                                                                                                                                                                      |                                                                                                                                                                                                                                                                                                                                                                                                                                                                                                                                                                                                                                                                                                                                       |
| Citations                                                                               |                                                                                                                                                                                                                                                             |                                                                                                                                                                                                                                                                                                                                                                                                                                                                                                                                                                                                                                                                                                                                                                                                                                                                                                                                                                                                                                                                                                                                                                                                                                                                                                                                                                                                                                                                                                                                                                                                                                                                                                                                                                                                                       |                                                                                                                                                                                                                                                                                                                                                                                                                                                                                                                                                                                                                                                                                                                                       |
| [1]                                                                                     | Wai, Ching M. et al. 2017. "Temporal and Spatial Transcriptomic and MicroRNA Dynamics of CAM Photosynthesis in Pineapple." <i>The Plant Journal</i> 92(1): 19–30.                                                                                           |                                                                                                                                                                                                                                                                                                                                                                                                                                                                                                                                                                                                                                                                                                                                                                                                                                                                                                                                                                                                                                                                                                                                                                                                                                                                                                                                                                                                                                                                                                                                                                                                                                                                                                                                                                                                                       |                                                                                                                                                                                                                                                                                                                                                                                                                                                                                                                                                                                                                                                                                                                                       |
| [2]                                                                                     | De La Harpe, M. et al. 2020. "Genomic footprints of repeated evolution of CAM photosynthesis in a Neotropical species radiation." <i>Plant, Cell and Environment</i> 43(12): 2987-3001.                                                                     |                                                                                                                                                                                                                                                                                                                                                                                                                                                                                                                                                                                                                                                                                                                                                                                                                                                                                                                                                                                                                                                                                                                                                                                                                                                                                                                                                                                                                                                                                                                                                                                                                                                                                                                                                                                                                       |                                                                                                                                                                                                                                                                                                                                                                                                                                                                                                                                                                                                                                                                                                                                       |
| [3]                                                                                     | McClung, C. Robertson. 2006. "Plant Circadian Rhythms." <i>The Plant Cell</i> 18(4): 792–803.                                                                                                                                                               |                                                                                                                                                                                                                                                                                                                                                                                                                                                                                                                                                                                                                                                                                                                                                                                                                                                                                                                                                                                                                                                                                                                                                                                                                                                                                                                                                                                                                                                                                                                                                                                                                                                                                                                                                                                                                       |                                                                                                                                                                                                                                                                                                                                                                                                                                                                                                                                                                                                                                                                                                                                       |
| [4]                                                                                     | Vera-Estrella, R. et al. 2012. "Day/Night Regulation of Aquaporins during the CAM Cycle in Mesembryanthemum Crystallinum." <i>Plant, Cell &amp; Environment</i> 35(3): 485–501.                                                                             |                                                                                                                                                                                                                                                                                                                                                                                                                                                                                                                                                                                                                                                                                                                                                                                                                                                                                                                                                                                                                                                                                                                                                                                                                                                                                                                                                                                                                                                                                                                                                                                                                                                                                                                                                                                                                       |                                                                                                                                                                                                                                                                                                                                                                                                                                                                                                                                                                                                                                                                                                                                       |
| [5]                                                                                     | Cosentino, Cristian et al. 2013. "Proteomic Analysis of Mesembryanthemum Crystallinum Leaf Microsomal Fractions Finds an Imbalance in V-ATPase Stoichiometry during the Salt-Induced Transition from C3 to CAM." <i>Biochemical Journal</i> 450(2): 407–15. |                                                                                                                                                                                                                                                                                                                                                                                                                                                                                                                                                                                                                                                                                                                                                                                                                                                                                                                                                                                                                                                                                                                                                                                                                                                                                                                                                                                                                                                                                                                                                                                                                                                                                                                                                                                                                       |                                                                                                                                                                                                                                                                                                                                                                                                                                                                                                                                                                                                                                                                                                                                       |
| [6]                                                                                     | Cushman, John C. et al. 2008. "Large-Scale mRNA Expression Profiling in the Common Ice Plant, Mesembryanthemum Crystallinum, Performing C3 Photosynthesis and Crassulacean Acid Metabolism (CAM)." <i>Journal of Experimental Botany</i> 59(7): 1875–94.    |                                                                                                                                                                                                                                                                                                                                                                                                                                                                                                                                                                                                                                                                                                                                                                                                                                                                                                                                                                                                                                                                                                                                                                                                                                                                                                                                                                                                                                                                                                                                                                                                                                                                                                                                                                                                                       |                                                                                                                                                                                                                                                                                                                                                                                                                                                                                                                                                                                                                                                                                                                                       |
| [7]                                                                                     | Ming, Ray et al. 2015. "The Pineapple Genome and the Evolution of CAM Photosynthesis." <i>Nature Genetics</i> 47(12): 1435–42.                                                                                                                              |                                                                                                                                                                                                                                                                                                                                                                                                                                                                                                                                                                                                                                                                                                                                                                                                                                                                                                                                                                                                                                                                                                                                                                                                                                                                                                                                                                                                                                                                                                                                                                                                                                                                                                                                                                                                                       |                                                                                                                                                                                                                                                                                                                                                                                                                                                                                                                                                                                                                                                                                                                                       |
| [8]                                                                                     | Xiao, B., et al. 2007. "Over-Expression of a LEA Gene in Rice Improves Drought Resistance under the Field Conditions." <i>Theoretical and Applied Genetics</i> 115(1): 35–46.                                                                               |                                                                                                                                                                                                                                                                                                                                                                                                                                                                                                                                                                                                                                                                                                                                                                                                                                                                                                                                                                                                                                                                                                                                                                                                                                                                                                                                                                                                                                                                                                                                                                                                                                                                                                                                                                                                                       |                                                                                                                                                                                                                                                                                                                                                                                                                                                                                                                                                                                                                                                                                                                                       |
| [9]                                                                                     | Christin, Pascal-Antoine et al. 2014. "Shared Origins of a Key Enzyme during the Evolution of C4 and CAM Metabolism." <i>Journal of Experimental Botany</i> 65(13): 3609–21.                                                                                |                                                                                                                                                                                                                                                                                                                                                                                                                                                                                                                                                                                                                                                                                                                                                                                                                                                                                                                                                                                                                                                                                                                                                                                                                                                                                                                                                                                                                                                                                                                                                                                                                                                                                                                                                                                                                       |                                                                                                                                                                                                                                                                                                                                                                                                                                                                                                                                                                                                                                                                                                                                       |

### 138 3. Supplementary Notes

139

#### 140 **Note 1: Genome size and karyotype of *T. fasciculata* and *T. leiboldiana***

141

142 The genome size of both specimens used for *de novo* assembly was measured with flow cytometry  
143 (See Methods, section 1.1.), estimating genome sizes of approximately 790 and 1,130 Mb for  
144 *Tillandsia fasciculata* and *T. leiboldiana* respectively (Fig. S8). These estimates are slightly higher  
145 than those obtained computationally with a kmer-based approach implemented in findGSE<sup>1</sup> (k =  
146 21, 701 and 1,125 Mb respectively, Fig. S10); but deviations of genome size in computational  
147 approaches have been reported frequently<sup>1-3</sup>. We also obtained a karyotype for both species using  
148 root material (See Methods, section 5.1.2.). We observe a change in karyotype between the two  
149 species resulting in a reduction by six chromosome pairs in *T. leiboldiana* compared to *T.*  
150 *fasciculata*, which carries the base karyotype of  $2n = 50$  encountered in *Tillandsioideae*<sup>4</sup> (Fig. S9).  
151 This is in accordance with chromosome counts reported by Brown and Gilmartin (1989)<sup>4</sup>.

152

#### 153 **Note 2: Pre-assembly estimation of per-accession heterozygosity**

154

155 Heterozygosity estimates of the chosen accessions along with several other candidate accessions  
156 from the Botanical Gardens of the University of Vienna were obtained with short-read Illumina  
157 data before *de novo* assembly, with the aim to select accessions with lowest heterozygosity and to  
158 make adjustments during *de novo* assembly to account for potentially elevated rates of  
159 heterozygosity. This short-read data was later used for polishing purposes and the sequencing  
160 details can be found in the Methods section *Plant material selection and sequencing*.  
161 Heterozygosity estimates were obtained by two approaches: a k-mer based approach and a  
162 reference-based approach. For the k-mer based approach, findGSE<sup>5</sup> was used with a k = 21 to  
163 obtain k-mer peaks of heterozygosity. For the reference-based approach, reads were trimmed with  
164 Trimmomatic<sup>6</sup> and mapped with GSNAP<sup>7</sup> to the *Tillandsia adpressiflora* pseudoreference built  
165 by De la Harpe and colleagues<sup>8</sup>. After filtering for low mapping quality and marking duplicates,  
166 variants were called for all accessions using freebayes<sup>9</sup>. Variants with an individual depth under 5  
167 and above 45 were removed and no missing data was retained. Then, heterozygous sites per 1000  
168 mappable sites were counted with a custom-made python script, filtering for allele balance

169 between 0.25 and 0.75. This yielded between 51,000 and 58,000 windows, translating to roughly  
170 a 50 Mb portion of the genome. We expect these windows to be enriched for genic and other  
171 conserved regions, therefore resulting in an underestimate, though for relative comparisons, we  
172 regard this approach as valid. Both the k-mer (Fig. S10) and reference-based approach (Fig. S11)  
173 showed that heterozygosity is elevated in *T. fasciculata* compared to *T. leiboldiana*. This result is  
174 consistent with the nucleotide diversity estimates reported by Yardeni et al.<sup>10</sup> based on sequencing  
175 of 1776 targeted loci in several Tillandsia species, including *T. leiboldiana* ( $\pi_S=5.7 \times 10^{-3}$ ) and *T.*  
176 *fasciculata* ( $\pi_S=8.1 \times 10^{-3}$ ). The relatively moderate levels of diversity in these species helped us to  
177 obtain assemblies with such a remarkable contiguity (Table S2), despite their very high repetitive  
178 content (see Supplementary Note 4).

179

### 180 **Note 3: Identifying main scaffolds in de novo assembly**

181

182 After scaffolding with Hi-C data, the resulting *de novo* assemblies contained a total of 2,321 and  
183 10,443 scaffolds (> 1 kb) for *T. fasciculata* and *T. leiboldiana* respectively. However, more than  
184 99 % of one-to-one orthologous gene pairs are located on the 25 and 26 largest scaffolds of both  
185 assemblies respectively, while 90.7 % and 87.6 % of all gene models are on these scaffolds.  
186 Therefore, the remaining scaffolds mainly consist of repetitive content, virtually corresponding to  
187 short, duplicated regions in the assembly. The mean proportion of repetitive content in the  
188 remaining scaffolds is indeed much higher than in main scaffolds (94.9 % and 91 % in small  
189 scaffolds of *T. fasciculata* and *T. leiboldiana*, versus 65.5 and 77.1% in the “main” scaffolds (see  
190 main text)). In addition, these “main” scaffolds contain the vast majority of the assembly (72 %  
191 and 75.5 % of the total assembly length). While the sizes of the longest 25 and 24 scaffolds are  
192 over 1 Mb, other scaffold sizes steeply decline afterwards (Fig. S1). Given this, we decided to  
193 regard these scaffolds as representative for the respective genomes and excluded all secondary  
194 scaffolds from downstream analyses from this point onwards. Though scaffolds 26 and 25 in *T.*  
195 *leiboldiana* are smaller than 1 Mb, they contain a substantial number of orthologous genes (Fig.  
196 S1) and were therefore maintained in all analyses.

197

198

199

200 **Note 4: On the success of *de novo* assembly of highly repetitive genomes**

201

202 The highly repetitive content observed in many plant genomes often causes fragmented genome  
203 assemblies. Despite considerable progress thanks to long-read sequencing technologies<sup>13</sup>, little to  
204 no genomic resources are available yet for some plant clades, particularly for species with the  
205 remaining challenge of a highly repetitive content<sup>10</sup>. The availability of long-read sequencing and  
206 chromatin conformation capture technologies have now enabled the assembly of particularly  
207 complex genomes with little fragmentation, in the best case at the chromosome-level. Our project  
208 was therefore launched and made possible because of these recent technological advances.

209 The kmer-based approach implemented in findGSE<sup>1</sup> (k = 21, see also SI Note 1 and 2)  
210 estimates the TE content directly from raw reads, *i.e.*, prior to generating *de novo* assemblies. We  
211 estimated that the repetitive content of *T. fasciculata* and *T. leiboldiana* was around 66 % and 75  
212 %, respectively. Based on *de novo* generated assemblies and TE annotations performed with  
213 EDTA, we observed remarkably consistent estimates (65.5 % and 77.1 % in *T. fasciculata* and *T.*  
214 *leiboldiana*, Table S3) on the main scaffolds (SI Note 3). Such values are one of the most elevated  
215 among plant genomes assembled at chromosome scale<sup>11</sup>.

216 Additionally, our analyses of spatial distribution of TE content highlight the extreme local  
217 levels of repetitive content in these genomes, especially in *T. leiboldiana*. In non-telomeric regions,  
218 the observed repetitive content most often reaches values above 80% for *T. fasciculata* and nearly  
219 100% for *T. leiboldiana* (Fig. 2b, Fig. S2).

220 Considering the extremely high repetitive content in centromeric regions, especially for *T.*  
221 *leiboldiana*, the limited fragmentation of our assembly can be considered as a success and therefore  
222 represent empirical evidence of the progress made in plant genomics, only twenty years after the  
223 release of the first plant genome. At the age of long-read sequencing and chromatin conformation  
224 capture technologies, the *de novo* sequencing of plant species associated with a highly repeated  
225 genomic content is becoming more and more feasible.

226

227

228

229

230

231 **Note 5: On the spatial distribution of GC and TE content in bromeliad genomes**

232

233 After finding that GC and genic content were negatively correlated in both *Tillandsia* genomes  
234 (See Results), we decided to study the link between GC content and repetitive content in all  
235 bromeliad genomes available to us at the time (*A. comosus*, *T. fasciculata* and *T. leiboldiana*)  
236 Using softmasked versions for all three genomes (see Materials and Methods), we computed the  
237 proportion of soft-masked bases across 100 kb windows. We also computed the overall GC content  
238 (considering both softmasked and non-softmasked positions), the GC content for soft-masked  
239 bases only, and the GC content for non-softmasked bases in the same windows. Based on this, the  
240 average TE content was estimated to be of 36.7 %, 67.9 % and 79.1% for *A. comosus*, *T. fasciculata*  
241 and *T. leiboldiana*, respectively. These three genomes therefore represent a gradient regarding the  
242 amount of TEs. After having reported the relatively well conserved synteny (Fig. 2c), we were  
243 able to estimate the evolution of the repetitive, GC and genic chromosomal landscapes across  
244 syntenic chromosomes. We selected three examples of syntenic triplets considering scaffolds with  
245 no main chromosomal rearrangements: triplets A.com 3 / T.fas 4 / T.lei 1 (Fig. 2b), A.com 6 /  
246 T.fas 11 / T.lei. 15 and A.com 11 / T.fas 12 / T.lei 5 (Fig. S2). We then considered a relative position  
247 of each window on the scaffold (window position/scaffold length) to account for the difference in  
248 length of the syntenic chromosomes in the three assemblies. From this visualization, it became  
249 clear that the GC content landscape is largely shaped by TE dynamics in the three genomes, since  
250 the GC% at non-repetitive content show no to little variation across the scaffold, except in *T.*  
251 *leiboldiana*. This contributed to building large GC-rich isochores in centromeric regions. Note  
252 here that our *de novo* TE libraries are not necessarily exhaustive and therefore a part of the  
253 repetitive content may have remained non-softmasked, which could partly or completely explain  
254 the pattern observed for GC at non-softmasked position in *T. leiboldiana*. Since this pattern is  
255 observed in all three species, regardless of the difference in repetitive content, this may be a family-  
256 wide phenomenon.

257

258

259

260

261



262 **Note 6: Identifying large-scale rearrangements between *T. fasciculata* and *T. leiboldiana***

263

264 Large-scale rearrangements were first perceived in the synteny analysis of the two  
265 assemblies. These were further investigated by whole-genome alignment of the two assemblies to  
266 each other, and to *A. comosus*, using nucmer<sup>12</sup> and visualised with Dot  
267 (<https://github.com/dnanexus/dot>).

268 Large rearrangements that were identified between *T. fasciculata* and *T. leiboldiana* were  
269 further investigated by performing LastZ alignments<sup>13</sup> of soft-masked genomes. LastZ was run  
270 with the following settings: --notransition, --step=10, --gapped, --chain, --gfextend, --format=maf.  
271 Local alignments were filtered by the 95th identity and length quartile as implemented in Leroy et  
272 al (2021)<sup>14</sup>. Additionally, alignments were filtered by uniqueness with a custom-made python  
273 script, by removing all alignments with more than a 90 % overlap. Final local alignments were  
274 visualised for each scaffold as in Leroy et al (2021). All scripts are available at:  
275 <https://shorturl.at/xLS15>.

276 The breakpoint area of confirmed rearrangements was defined as the region between the  
277 last alignment of a given scaffold and the first alignment of another scaffold. Rearrangements were  
278 then finally confirmed by investigating the alignment of long-read PacBio data to the assembly of  
279 the same species. Whenever no clear break could be identified in the long-read alignment within  
280 the breakpoint area, the rearrangement was considered as confirmed.

281 With these methods, we described three potential large-scale rearrangements. Scaffold 14  
282 in *T. leiboldiana* could be a fusion of scaffolds 17 and 25 in *T. fasciculata*, or scaffolds 17 and 25  
283 could be the result of a fission in a reversed scenario (Fig. S3a). We also detected two potential  
284 translocations (Fig. S3b for Translocation 1 and Fig. S3b for Translocation 2). All breakpoints  
285 were confirmed by alignment of raw PacBio reads, except for breakpoint 1 on scaffold 13 of *T.*  
286 *fasciculata* of Translocation 1 (Fig. S3b). However, breakpoint 2 on this scaffold was confirmed,  
287 which led us to maintain the translocation as a candidate rearrangement. For several scaffolds,  
288 local alignments were too sparse to determine a clear breakpoint (See Fig. S3). To see the PacBio  
289 alignment at each breakpoint, see the supplementary PDF file “Tfas\_Tlei\_rearrangements.pdf” on  
290 our github repository.

291 We studied the effects of large-scale rearrangement on the genomic distribution of  $d_N/d_S$   
292 values and, sperarately, on DE genes (See SI Note 11) to understand if there is a link between

293 chromosomal and functional evolution in *Tillandsia*. We did this by testing whether the  
294 distribution of  $d_N/d_S$  values in any of the rearranged chromosomes deviated from that of non-  
295 rearranged chromosomes (See Methods, section 9.1). Of the nine scaffolds involved in the three  
296 reported rearrangements, only two had a  $d_N/d_S$  distribution significantly deviating from that of non-  
297 rearranged chromosomes (scaffold 13 in *T. fasciculata* and scaffold 19 in *T. leiboldiana*, see Fig.  
298 S4b). The  $d_N/d_S$  values in these scaffolds, which are both involved in Translocation 1, were ever  
299 so slightly reduced compared to non-rearranged scaffolds (median scaffold 13 = 0.3197, other  
300 scaffolds in *T. fasciculata* = 0.3569; median scaffold 19 = 0.3326, other scaffolds in *T. leiboldiana*  
301 = 0.3591). An overall reduction in chromosome-wide  $d_N/d_S$  values can be expected in rearranged  
302 chromosomes due to an increase in linkage disequilibrium resulting from recombination  
303 suppression, which in turn increases background selection<sup>15,16</sup>. This can have important  
304 implications for both adaptation and speciation, as functional loci may be under increased selective  
305 constraint, and selection against introgression may also become stronger<sup>16</sup>. However, the  
306 significance of this reduction in  $d_N/d_S$  is very slight and only visible in two of nine rearranged  
307 scaffolds. Combined with our results on DE gene distribution across the genome, which show no  
308 signal of rearrangements playing a role in spatial distribution of ecologically relevant genes (See  
309 SI Note 11), we are cautious in heralding large-scale rearrangement as a key driving force of  
310 ecological diversification in *Tillandsia* until additional supporting evidence becomes available  
311 (See SI Note 12).

312

### 313 **Note 7: Correcting multi-copy gene family sizes**

314

315 Gene counts per orthogroup were evaluated using per-gene mean coverage to detect  
316 potential haplotig gene sequences that may have escaped Purge Haplotigs in the assembly step. To  
317 do this, whole-genome Illumina reads of both species (See Methods, section 2.1.) were aligned to  
318 their respective assemblies using Bowtie2<sup>17</sup> with the very-sensitive-local option. Bowtie2  
319 specifically assigns multi-mapping reads randomly, allowing the detection of artificial gene  
320 models thanks to a decreased overall coverage across the orthogroup, as reads from one biological  
321 copy are randomly distributed over two or more locations in the genome. Per-base coverage in  
322 genic regions was calculated using samtools depth and a bedfile specifying all locations of  
323 orthologous genes. We then calculated the average coverage per orthologous gene.

324 The distribution of per-gene mean coverage in each species' gene model set was then  
325 visualized using ggplot2<sup>18</sup> for different categories of genes: single-copy (only one gene model  
326 assigned to the orthogroup in the species investigated), multi-copy (more than one gene assigned  
327 to the orthogroup in the species investigated), ancestral single-copy (only one gene model assigned  
328 to the orthogroup in all species used in the orthology analysis) and ancestral multi-copy (multiple  
329 gene model assigned to the orthogroup in all species used in the orthology analysis and the number  
330 of gene models assigned is equal across species). This revealed that, while most categories of genes  
331 had a unimodal distribution centered around the average coverage across the genome, multi-copy  
332 and unique multi-copy families showed a bimodal or expanded distribution, especially in *T.*  
333 *fasciculata* (Fig. S12). This points at the presence of false gene copies in the annotation.  
334 Gene count sizes per orthogroup and species were therefore corrected by the ratio of the total  
335 coverage across all genes of one species in the orthogroup and the expected coverage, which was  
336 calculated as the product of the total number of genes in the orthogroup and the average coverage  
337 of single-copy genes in that species.

338 Size corrections were only applied on orthogroups containing multicopy genes. Plastid and  
339 mitochondrial genes were excluded from this analysis. We detected plastid genes with BLASTn  
340 against the *A. comosus* chloroplast sequence and the *Oryza* IRSGP-1 mitochondrial sequence.  
341 Additionally, all genes annotated as "ribosomal" were also excluded from the downstream gene  
342 family evolution analyses.

343 Originally, 9,210 genes in *T. fasciculata* and 6,257 genes in *T. leiboldiana* were assigned  
344 to orthogroups with multiple gene copies in at least one species. After correcting orthogroup sizes  
345 by coverage, we retained 6,261 and 4,693 gene models, respectively (Table S4).

346

#### 347 **Note 8: Selecting rapidly evolving gene families**

348

349 To better understand the distribution of gene size differences, the log-ratio was taken of *T.*  
350 *fasciculata* to *T. leiboldiana* gene counts, and the overall mean log-ratio was subtracted to correct  
351 for background rates of gene loss or duplication. Orthogroups were ranked by corrected log-ratios  
352 and the top and bottom 2 % were then selected for further analysis. Due to the relatively large  
353 proportion of one-to-one relationships (79 %) among orthogroups, all orthogroups with a family  
354 size change between *T. fasciculata* and *T. leiboldiana* were included in the top 2 % of gene changes

355 and therefore selected for GO term enrichment, which was performed separately for orthogroups  
356 with gene count larger in *T. fasciculata* (916 orthogroups) and larger in *T. leiboldiana* (583  
357 orthogroups).

358

### 359 **Note 9: Detailed description of candidate genes for positive selection**

360

361 Our  $d_N/d_S$  calculations pointed at 13 single-copy and 3 multi-copy genes exhibiting  
362 signatures of divergent selection between *T. fasciculata* and *T. leiboldiana*. The most relevant  
363 genes have been described in the main text and in Table 2, but here we provide more information  
364 on all candidate genes, which could be interesting for future work to investigate speciation genes  
365 in *Tillandsia*.

366 Among single-copy candidates, we found a Jacalin-related lectin (JLR, OG0002972),  
367 which are often associated with biotic and abiotic stimuli, though their biological function is  
368 largely unknown. In wheat, a mannose-specific JLR has been identified as a component of the  
369 defence system<sup>19</sup>. In rice, a JLR has been described as playing a role in salt stress response<sup>20</sup>.

370 Orthogroup OG0005000 codes for a cupredoxin (cupredoxin cucumber peeling-like).  
371 Cupredoxins are small proteins containing a copper centre which function as electron transfer  
372 shuttles between redox partners, but their more specific biological function is largely unknown<sup>21</sup>.  
373 However, they tend to play a role in respiration, photosynthesis and metabolism<sup>22</sup>, and therefore  
374 represent another interesting candidate for further investigations.

375 Another candidate for adaptive sequence evolution was a mitochondrial prohibitin-3  
376 (OG0006253), a subunit of the prohibitin complex. While the exact mechanism of prohibitin is  
377 unknown, it has been associated with mitochondrial biogenesis in *Nicotiana benthamiana*<sup>23</sup> and  
378 more specifically protection against salt stress in *Arabidopsis thaliana*<sup>24</sup>.

379 We recovered a hydroquinone glycosyltransferase (OG0009004), a broad-spectrum  
380 glycosyltransferase involved in the secondary metabolism of many phenolic compounds and  
381 xenobiotics<sup>25</sup>.

382 Orthogroup OG0009278 codes for chloroplastic Peroxiredoxin-2E-2, which is a member  
383 of the thiol peroxidase family. These enzymes play an important role in regulating Reactive  
384 Oxygen Species (ROS) by reducing hydroperoxides. Peroxiredoxin-2E-2 is present in

385 chloroplasts, especially in reproductive tissues, and its expression is sensitive to light and salt  
386 levels<sup>26</sup>.

387 The remaining single-copy orthogroups that are candidates for adaptive sequence evolution  
388 are involved in cell replication (OG0015603) or members of a broad gene superfamily  
389 (OG0012770).

390 In addition to single copy genes, we tested for adaptive sequence evolution in orthogroups  
391 with a 1:1:2 or 1:2:1 relationship, *i.e.* a single gene in *A. comosus* and a duplicated gene either in  
392 *T. leiboldiana* (1:1:2 , 108 genes), or *T. fasciculata* (1:2:1, 190). We recovered a gene family in  
393 1:2:1 conformation coding for a protein ECIFERUM 1-like, where one of two copies in *T.*  
394 *fasciculata* had  $\omega > 1$ . In *A. thaliana*, protein ECIFERUM-1 is involved in the biosynthesis of  
395 alkanes, which form hydrophobic cuticular waxes that protect the plant from desiccation. It has  
396 been shown that changes in expression of ECIFERUM-1 affect susceptibility to water stress and  
397 pathogens, therefore linking the protein with responses to biotic and abiotic stress<sup>27</sup>.

398 We also recovered one candidate orthogroup in 1:1:2 conformation coding for a kinesin-  
399 like protein KIN-10C. Members of the kinesin superfamily are molecular motors playing important  
400 roles in intracellular transport of vesicles and organelles, spindle formation and elongation,  
401 chromosome segregation, morphogenesis, and signal transduction<sup>28</sup>. Both *T. leiboldiana* gene  
402 copies showed elevated  $d_N/d_S$  ratios (See Table 1), though only one ratio was significant,  
403 suggesting that both gene copies have undergone significant evolution in *T. leiboldiana*.

404 Another candidate orthogroup in 1:2:1 conformation codes for a Ubiquitin-conjugating  
405 (UBC) enzyme E2, which plays an important role in the targeting of proteins by ubiquitination for  
406 the proteasome. In mung bean, a UBC E2 enhances osmotic stress tolerance<sup>29</sup>, and in Arabidopsis  
407 the overexpression of a soy bean<sup>30</sup> and peanut<sup>31</sup> UBC E2 protein increases drought and salt  
408 tolerance.

409

#### 410 **Note 10: Differential gene expression using the *T. leiboldiana* assembly**

411

412 In addition to the DE analysis using the *T. fasciculata* genome as reference, we performed a second  
413 DE analysis with the *T. leiboldiana* genome as reference to test whether the one-directional  
414 enrichment of multi-copy gene families is the result of a technical bias when using the *T.*  
415 *fasciculata* genome for DE analysis. It is indeed possible that differential gene expression in

416 additional copies of *T. leiboldiana* are missed, as these are not present in the *T. fasciculata* genome  
417 and may be too divergent to map onto a different copy. We indeed find enrichment for gene  
418 families with gene counts higher in *T. leiboldiana*, which occur twice as much compared to the  
419 whole genome (Chi-square  $P = 1.011568e^{-33}$ , Table 4). We also find a small increase of multicopy  
420 families with higher gene counts in *T. fasciculata* compared to the whole genome when using  
421 mapped reads to *T. leiboldiana* (See Results).

422

#### 423 **Note 11: Distribution of DE genes across the genome**

424

425 Using only robust gene annotations, we calculated the relative density of DE genes in 1 Mb  
426 windows across each genome, by dividing the DE gene count in each window by the total gene  
427 count. The result was then visualised with the R package *circlize*<sup>32</sup> (Fig. S13). Across the *T.*  
428 *fasciculata* genome, differentially expressed genes follow a similar distribution as all other genes,  
429 and we do not detect any peaks of high DE gene density. In *T. leiboldiana*, regions with elevated  
430 DE gene density can be seen on most chromosomes, though these are in interior regions where the  
431 total gene count in a window is generally low. Therefore, these peaks appear inflated by low  
432 sample size. We don't see any clear signal of increased DE density in rearranged chromosomes.

433

#### 434 **Note 12: Limitations of this study and future directions**

435

436 A few limitations of this study should be mentioned. First, a pairwise framework limits the  
437 array of methods available, and especially restricts us from using methods that rely on a phylogeny.  
438 Especially the tests of adaptive sequence evolution would benefit from further investigations with  
439 methods relying on a phylogenetic framework, to better understand which species experienced  
440 positive selection, and whether these cases of selection are repeated across CAM/C3 shifts. Despite  
441 the availability of the *A. comosus* reference genome, this species is too divergent from *Tillandsia*,  
442 making alignments of a notable portion of the genes unreliable. Additional genomic resources will  
443 be needed, but our current work paves the way towards achieving this goal. Interestingly, though  
444 we found no overlap between DE genes and genes undergoing adaptive sequence evolution, almost  
445 half of the genes identified as candidates of positive selection in CAM lineages after a CAM/C3

446 shift in a previous study using a phylogenetic framework were differentially expressed in this  
447 study<sup>8</sup>.

448 Secondly, our investigations on large-scale rearrangements were limited due to the available  
449 resources and remaining fragmentation in one of our *de novo* assemblies. While the *T. fasciculata*  
450 *de novo* assembly recovered all chromosomes in individual scaffolds, this is not the case for *T.*  
451 *leiboldiana*, which still has 26 main scaffolds despite counting 19 haploid chromosomes. This  
452 remaining fragmentation limited our study of rearrangement in *T. leiboldiana*, especially regarding  
453 the karyotype differences between both species, despite the detection of one fused scaffold. To  
454 further investigate the impact of these large-scale rearrangements on *Tillandsia* evolution,  
455 improvement of the *T. leiboldiana* assembly with additional genomic data will be necessary.  
456 Additionally, our analyses on the effect of large-scale rearrangement on functional sites (SI Note  
457 6) could also be expanded by a population-level study, which would allow for measurement of  
458 per-scaffold nuclear diversity and recombination rates, which may point at the role of  
459 rearrangement in shaping chromosome-wide recombination and selection landscapes. This would  
460 provide additional evidence that large-scale rearrangements played a role in the *Tillandsia*  
461 radiation, something that has already been reported in other radiating lineages, but that we can so  
462 far not confidently state for here. Since the cost of genome assemblies and sequencing is rapidly  
463 decreasing, a future large-scale study of rearrangements across *Tillandsia* including more species  
464 and accessions is becoming feasible.

465

#### 466 4. References

- 467 1. Al-Qurainy, F. *et al.* Estimation of Genome Size in the Endemic Species *Reseda pentagyna*  
468 and the Locally Rare Species *Reseda lutea* Using comparative Analyses of Flow Cytometry  
469 and K-Mer Approaches. *Plants* **10**, (2021).
- 470 2. Pflug, J. M., Holmes, V. R., Burrus, C., Johnston, J. S. & Maddison, D. R. Measuring Genome  
471 Sizes Using Read-Depth, k-mers, and Flow Cytometry: Methodological Comparisons in  
472 Beetles (Coleoptera). *G3* **10**, 3047–3060 (2020).
- 473 3. Elliott, T. A. & Gregory, T. R. What's in a genome? The C-value enigma and the evolution  
474 of eukaryotic genome content. *Philos. Trans. R. Soc. Lond. B Biol. Sci.* **370**, 20140331 (2015).

- 475 4. Brown, G. K. & Gilmartin, A. J. CHROMOSOME NUMBERS IN BROMELIACEAE. *Am.*  
476 *J. Bot.* **76**, 657–665 (1989).
- 477 5. Sun, H., Ding, J., Piednoël, M. & Schneeberger, K. findGSE: estimating genome size  
478 variation within human and Arabidopsis using k-mer frequencies. *Bioinformatics* **34**, 550–  
479 557 (2018).
- 480 6. Bolger, A. M., Lohse, M. & Usadel, B. Trimmomatic: A flexible trimmer for Illumina  
481 sequence data. *Bioinformatics* **30**, 2114–2120 (2014).
- 482 7. Wu, T. D., Reeder, J., Lawrence, M., Becker, G. & Brauer, M. J. GMAP and GSNAP for  
483 Genomic Sequence Alignment: Enhancements to Speed, Accuracy, and Functionality. in  
484 *Statistical Genomics: Methods and Protocols* (eds. Mathé, E. & Davis, S.) 283–334 (Springer  
485 New York, 2016).
- 486 8. De La Harpe, M. *et al.* Genomic footprints of repeated evolution of CAM photosynthesis in  
487 a Neotropical species radiation. *Plant Cell Environ.* ce.13847 (2020).
- 488 9. Garrison, E. & Marth, G. Haplotype-based variant detection from short-read sequencing.  
489 *arXiv [q-bio.GN]* (2012).
- 490 10. Marks, R. A., Hotaling, S., Frandsen, P. B. & VanBuren, R. Representation and participation  
491 across 20 years of plant genome sequencing. *Nat Plants* **7**, 1571–1578 (2021).
- 492 11. Pedro, D. L. F. *et al.* An Atlas of Plant Transposable Elements. *Fl000Res.* **10**, 1194 (2021).
- 493 12. Delcher, A. L., Phillippy, A., Carlton, J. & Salzberg, S. L. Fast algorithms for large-scale  
494 genome alignment and comparison. *Nucleic Acids Res.* **30**, 2478–2483 (2002).
- 495 13. Harris, R. S. Improved pairwise alignment of genomic DNA. (The Pennsylvania State  
496 University, 2007).
- 497 14. Leroy, T. *et al.* A bird’s white-eye view on avian sex chromosome evolution. Preprint at  
498 <https://doi.org/10.24072/pcjournal.70> (2021).
- 499 15. Mérot, C., Oomen, R. A., Tigano, A. & Wellenreuther, M. A Roadmap for Understanding the



500 Evolutionary Significance of Structural Genomic Variation. *Trends Ecol. Evol.* **35**, 561–572  
501 (2020).

502 16. Cicconardi, F. *et al.* Chromosome Fusion Affects Genetic Diversity and Evolutionary  
503 Turnover of Functional Loci but Consistently Depends on Chromosome Size. *Mol. Biol. Evol.*  
504 **38**, 4449–4462 (2021).

505 17. Langmead, B. & Salzberg, S. L. Fast gapped-read alignment with Bowtie 2. *Nat. Methods* **9**,  
506 357–359 (2012).

507 18. Wickham, H. *ggplot2: Elegant Graphics for Data Analysis*. (Springer-Verlag, 2016).

508 19. Xiang, Y. *et al.* A jacalin-related lectin-like gene in wheat is a component of the plant defence  
509 system. *J. Exp. Bot.* **62**, 5471–5483 (2011).

510 20. Zhang, W. *et al.* Isolation and characterization of a jacalin-related mannose-binding lectin  
511 from salt-stressed rice (*Oryza sativa*) plants. *Planta* **210**, 970–978 (2000).

512 21. Guss, J. M., Merritt, E. A., Phizackerley, R. P. & Freeman, H. C. The structure of a  
513 phycocyanin, the basic blue protein from cucumber, refined at 1.8 Å resolution. *J. Mol. Biol.*  
514 **262**, 686–705 (1996).

515 22. Choi, M. & Davidson, V. L. Cupredoxins--a study of how proteins may evolve to use metals  
516 for bioenergetic processes. *Metallomics* **3**, 140–151 (2011).

517 23. Ahn, C. S., Lee, J. H., Reum Hwang, A., Kim, W. T. & Pai, H.-S. Prohibitin is involved in  
518 mitochondrial biogenesis in plants. *Plant J.* **46**, 658–667 (2006).

519 24. Wang, Y., Ries, A., Wu, K., Yang, A. & Crawford, N. M. The Arabidopsis Prohibitin Gene  
520 PHB3 Functions in Nitric Oxide-Mediated Responses and in Hydrogen Peroxide-Induced  
521 Nitric Oxide Accumulation. *Plant Cell* **22**, 249–259 (2012).

522 25. Hefner, T., Arend, J., Warzecha, H., Siems, K. & Stöckigt, J. Arbutin synthase, a novel  
523 member of the NRD1beta glycosyltransferase family, is a unique multifunctional enzyme  
524 converting various natural products and xenobiotics. *Bioorg. Med. Chem.* **10**, 1731–1741

525 (2002).

526 26. Rouhier, N. & Jacquot, J.-P. The plant multigenic family of thiol peroxidases. *Free Radic.*  
527 *Biol. Med.* **38**, 1413–1421 (2005).

528 27. Bourdenx, B. *et al.* Overexpression of Arabidopsis ECERIFERUM1 promotes wax very-  
529 long-chain alkane biosynthesis and influences plant response to biotic and abiotic stresses.  
530 *Plant Physiol.* **156**, 29–45 (2011).

531 28. Li, J., Xu, Y. & Chong, K. The novel functions of kinesin motor proteins in plants.  
532 *Protoplasma* **249 Suppl 2**, S95-100 (2012).

533 29. Chung, E. *et al.* Overexpression of VrUBC1, a Mung Bean E2 Ubiquitin-Conjugating  
534 Enzyme, Enhances Osmotic Stress Tolerance in Arabidopsis. *PLoS One* **8**, e66056 (2013).

535 30. Zhou, G.-A., Chang, R.-Z. & Qiu, L.-J. Overexpression of soybean ubiquitin-conjugating  
536 enzyme gene GmUBC2 confers enhanced drought and salt tolerance through modulating  
537 abiotic stress-responsive gene expression in Arabidopsis. *Plant Mol. Biol.* **72**, 357–367  
538 (2010).

539 31. Wan, X., Mo, A., Liu, S., Yang, L. & Li, L. Constitutive expression of a peanut ubiquitin-  
540 conjugating enzyme gene in Arabidopsis confers improved water-stress tolerance through  
541 regulation of stress-responsive gene expression. *J. Biosci. Bioeng.* **111**, 478–484 (2011).

542 32. Gu, Z., Gu, L., Eils, R., Schlesner, M. & Brors, B. Circlize implements and enhances circular  
543 visualization in R. *Bioinformatics* **30**, 2811–2812 (2014).

544

545
